# Supplementary material for: Genome-wide meta-analysis and omics integration identifies novel genes associated with diabetic kidney disease
Source: PubMed Central journal article supplement (PMC9345823; doi:10.1007/s00125-022-05735-0), 2022-06-28

# Genome-wide meta-analysis and omics integration identifies novel genes associated with diabetic kidney disease

Niina Sandholm\*, Joanne B Cole\*, Viji Nair, Xin Sheng, Hongbo Liu, Emma Ahlqvist, Natalie van Zuydam, Emma H Dahlström, Damian Fermin, Laura J Smyth, Rany M Salem, Carol Forsblom, Erkka Valo, Valma Harjutsalo, Eoin P Brennan, Gareth J McKay, Darrell Andrews, Ross Doyle, Helen C Looker, Robert G Nelson, Colin Palmer, Amy Jayne McKnight, Catherine Godson, Alexander P Maxwell, Leif Groop, Mark I McCarthy, Matthias Kretzler, Katalin Susztak, Joel N Hirschhorn, Jose C Florez, Per-Henrik Groop, for the GENIE Consortium.

## Electronic Supplemental Material (ESM)

### Contents

|                                                                                                                                                                                                                                                                                                     |    |
|-----------------------------------------------------------------------------------------------------------------------------------------------------------------------------------------------------------------------------------------------------------------------------------------------------|----|
| ESM METHODS .....                                                                                                                                                                                                                                                                                   | 3  |
| ESM References.....                                                                                                                                                                                                                                                                                 | 11 |
| ESM Table 1: A total of ten case – control definitions for diabetic kidney disease (DKD; used as a general term to describe renal complications in diabetes).....                                                                                                                                   | 17 |
| ESM Table 2: Number of individuals in each cohort for each phenotypic comparison.....                                                                                                                                                                                                               | 18 |
| ESM Table 3: Key characteristics of the genotyping and statistical analyses in DNCRI and SUMMIT cohorts.....                                                                                                                                                                                        | 19 |
| ESM Table 4: List of related traits studied with LD score regression. ....                                                                                                                                                                                                                          | 20 |
| ESM Table 5: Association details for the novel genome-wide significant locus rs72831309 in <i>TENM2</i> ...22                                                                                                                                                                                       |    |
| ESM Table 6: Highly correlated reconstituted gene-sets that make-up the “basement membrane” meta-gene set derived in Marouli <i>et al.</i> .....                                                                                                                                                    | 23 |
| ESM Table 7: Association results for the lead SNPs at the MAGMA/PASCAL genes.....                                                                                                                                                                                                                   | 24 |
| ESM Table 8: TWAS results with $p < 1 \times 10^{-4}$ . ....                                                                                                                                                                                                                                        | 25 |
| ESM Table 9: eQTL and association data for SNPs that were selected by elastic net regression model in TWAS contributing to <i>AKIRIN2</i> TWAS association.....                                                                                                                                     | 26 |
| ESM Table 10: Kidney eQTL associations with $p < 1 \times 10^{-4}$ in tubular or glomerular eQTL data, or in the kidney eQTL meta-analysis for the lead SNPs. ....                                                                                                                                  | 27 |
| ESM Table 11: Significant kidney mQTL associations ( $p < 1.46 \times 10^{-11}$ Bonferroni-adjusted genome-wide significance; $1 \times 10^{-7}$ suggestive significance) for lead loci.....                                                                                                        | 28 |
| ESM Table 12: Correlation between glomerular and tubular gene expression and glomerulosclerosis, fibrosis, and eGFR in nephrectomy samples. ....                                                                                                                                                    | 29 |
| ESM Table 13: Gene centric summary of the lead genes .....                                                                                                                                                                                                                                          | 30 |
| ESM Table 14: Mendelian Randomization (MR) results for DKD (All vs Ctrl) .....                                                                                                                                                                                                                      | 32 |
| ESM Table 15. Egger intercepts for Mendelian Randomization analyses on DKD (all vs. Ctrl phenotype). ....                                                                                                                                                                                           | 33 |
| ESM Figure 1: Odds ratios required to detect association with $\geq 80\%$ statistical power, in function of the variant minor allele frequency [MAF]......                                                                                                                                          | 34 |
| ESM Figure 2: Manhattan and QQ-plots of the ten DKD GWAS meta-analysis results. ....                                                                                                                                                                                                                | 35 |
| ESM Figure 3: Regional association plot for the <i>COL4A3</i> gene region associated with Severe DKD, indicating a secondary association peak at chr2:228259302 (rs6436688, effect allele (A) frequency 56%, OR = 1.13 (95% confidence interval 1.08 – 1.19), p-value $1.79 \times 10^{-7}$ ). .... | 38 |
| ESM Figure 4: Regional association plots for the GWAS meta-analysis lead loci (A-K). ....                                                                                                                                                                                                           | 39 |

|                                                                                                                                                                                                         |    |
|---------------------------------------------------------------------------------------------------------------------------------------------------------------------------------------------------------|----|
| A: CKD+DKD chr5:166978230 (rs72831309).....                                                                                                                                                             | 39 |
| B: CKD chr2:3745215 (rs12615970).....                                                                                                                                                                   | 39 |
| C: Severe DKD chr2:228121101 (rs55703767).....                                                                                                                                                          | 40 |
| D: ESRD chr3:926345 (rs115061173).....                                                                                                                                                                  | 40 |
| F: ESRD vs. All chr3:36566312 (rs116216059).....                                                                                                                                                        | 42 |
| G: Severe DKD chr4:71358776 (rs191449639) .....                                                                                                                                                         | 43 |
| H: Micro chr7:99728546 (rs77273076) .....                                                                                                                                                               | 43 |
| I: ESRD vs. macro chr8:128100029 (rs551191707).....                                                                                                                                                     | 44 |
| J: Micro chr11:16937846 (rs183937294).....                                                                                                                                                              | 44 |
| K: CKD chr18:1811108 (rs185299109).....                                                                                                                                                                 | 45 |
| ESM Figure 5: Gene prioritization for the COL4A3 gene at lead SNP rs5570367 associated with Severe DKD using multiple intersecting gene prioritization approaches (PoPS, nearest gene, and MAGMA). .... | 46 |
| ESM Figure 6: Regional association plots for the gene-level analysis results from MAGMA and PASCAL analysis.....                                                                                        | 47 |
| A: CKD, <i>PTPRN</i> .....                                                                                                                                                                              | 47 |
| B: CKD, <i>RESP18</i> .....                                                                                                                                                                             | 47 |
| C: Severe DKD, <i>MFF</i> .....                                                                                                                                                                         | 48 |
| D: ESRD vs. macro, <i>EIF4E</i> .....                                                                                                                                                                   | 48 |
| E: DKD, <i>INIP</i> .....                                                                                                                                                                               | 49 |
| F: DKD, <i>SNX30</i> .....                                                                                                                                                                              | 49 |
| G: Severe DKD, <i>GPR158</i> .....                                                                                                                                                                      | 50 |
| H: ESRD vs. macro, <i>DCLK1</i> .....                                                                                                                                                                   | 50 |
| I: Severe DKD, <i>LSM14A</i> .....                                                                                                                                                                      | 51 |
| J: CKD extremes, <i>COL20A1</i> .....                                                                                                                                                                   | 51 |
| ESM Figure 7: TWAS QQ-plots and genomic control $\lambda$ GC inflation factors for A) tubular and B) glomerular expression.....                                                                         | 52 |
| ESM Figure 8: Tubular and glomerular gene expression of the lead genes correlate with multiple morphological and pathological renal parameters. ....                                                    | 54 |
| ESM Figure 9: Genetic correlation between DKD and related traits based on LD score regression. ....                                                                                                     | 55 |
| ESM Figure 10: Mendelian Randomization scatter plots for SNP effects for the metabolic traits vs. DKD (All vs. Ctrl).....                                                                               | 56 |
| ESM Figure 11: rs1260634 intronic in the <i>LSM14A</i> gene affects the predicted binding motifs for KLF12, KLF4, and SP8 (top to bottom).....                                                          | 57 |

## ESM METHODS

**Participating studies and phenotype definitions:** A total of ten case – control definitions for diabetic kidney disease (DKD) were included in DNCRI [1], based on either urinary albumin excretion rate (AER; divided into controls with normal AER, and cases with microalbuminuria, macroalbuminuria, or ESRD), estimated glomerular filtration rate (eGFR), or both, and harmonized to match and include all seven phenotypic definitions assessed in The SURrogate markers for Micro- and Macrovascular hard endpoints for Innovative diabetes Tools consortium (SUMMIT) type 1 diabetes (SUMMIT-1) analyses [2] and SUMMIT type 2 diabetes (SUMMIT-2) analyses [3] (**ESM Table 1**). All individuals (both cases and controls) had diabetes (either type 1 or type 2 diabetes) and cases had some form of kidney disease. The phenotypic comparisons are as follows: controls with normal AER vs. DKD cases with microalbuminuria or worse (“All vs. Ctrl”), macroalbuminuria or worse (“Severe DKD”), microalbuminuria alone (“Micro”), or “ESRD”; ESRD cases vs. everyone else (“ESRD vs. All”); controls with normal eGFR defined as  $eGFR \geq 60$  ml/min/1.73 m<sup>2</sup> vs. CKD defined as  $eGFR < 60$  ml/min/1.73 m<sup>2</sup> (“CKD”); and “CKD-DKD” based on both AER and eGFR, with controls with normal AER and eGFR vs. cases with microalbuminuria or worse and  $eGFR < 45$  ml/min/1.73 m<sup>2</sup>. For the three phenotypic comparisons not initially part of the SUMMIT analysis (normal AER vs. macroalbuminuria [“Macro”], ESRD vs. macroalbuminuria [“ESRD vs. macro”], and controls with  $eGFR \geq 60$  ml/min/1.73m<sup>2</sup> vs. CKD cases with  $eGFR < 15$  ml/min/1.73m<sup>2</sup> or ESRD [“CKD extremes”]), GWAS and meta-analysis were performed with three SUMMIT type 2 diabetes studies (Genetics of Diabetes Audit and Research, Tayside and Scotland [GoDARTS] 1 and 2, and Scania Diabetes Registry [SDR] type 2 diabetes cohort) and the SDR type 1 diabetes cohort. Individuals from the Finnish Diabetic Nephropathy Study (FinnDiane) were included in both the original DNCRI (N=6,019) and SUMMIT-1 analyses (N=3,415), but for the purpose of this meta-analysis, FinnDiane was only included in the DNCRI meta-analysis and therefore excluded from the SUMMIT-1 data (**ESM Table 2**). All contributing studies were performed in accordance with the Declaration of Helsinki and Declaration of Istanbul.

**Genome-wide association study (GWAS) and meta-analysis:** Genotyping and statistical analysis of the DNCRI [1] and SUMMIT [2, 3] cohorts have been previously described, and the statistical analyses were limited to the previously published results (apart from the three additional phenotypes for a subset of SUMMIT

cohorts mentioned above). Analysis plans were similar in both consortia, and the main characteristics are described in **ESM Table 3**. Imputation was performed using 1000Genomes Phase 3 reference panel in DNCRI, and the older 1000Genomes phase 1 panel in the SUMMIT cohorts. In both consortia, analyses were performed in unrelated individuals using the SNPtest additive score test, adjusting for age, sex, diabetes duration, the genetic principal components, and study-specific covariates (e.g., site or genotyping batch). Variants were filtered for INFO imputation quality score  $\geq 0.3$  (DNCRI) or  $\geq 0.4$  (SUMMIT) and minor allele count  $\geq 10$  in both cases and in controls. In SUMMIT, variants were further filtered to those with minor allele frequency (MAF)  $\geq 0.01$ . Within-consortium meta-analyses were performed with inverse-variance fixed effects meta-analysis based on the effect size estimates. Meta-analyses between DNCRI, SUMMIT-1, and SUMMIT-2 were performed with inverse-variance fixed effect methods based on the effect size estimates from the summary statistics for each of the three datasets with METAL software (released 2011-03-25) [4]. Finally, variants were limited to those found in at least two studies and reported in the 1000Genomes phase 3 reference panel. In addition, we performed meta-analyses for each DKD trait separately for individuals with type 1 diabetes (DNCRI and SUMMIT-1) and type 2 diabetes (SUMMIT-2), and calculated heterogeneity between type 1 and type 2 diabetes studies with METAL software [4]. Study-wise summary statistics were available for DNCRI and SUMMIT-1 studies. Regional association plots were plotted with LocusZoom [5]. We estimated the significance level for multiple testing correction using a method suggested previously [6]: correction for multiple testing was estimated with spectral decomposition of the GWAS Z-scores of the non-missing variants across the ten DKD traits, which suggested 5.36 effective tests, leading to a corrected significance threshold of  $p < 9.3 \times 10^{-9}$ .

The FinnDiane GWAS data, originally imputed together with the other DNCRI GWAS data sets using 1000Genomes Phase 3 reference panel, was re-imputed with a Finnish population-specific SISu v3 imputation reference panel. Samples were pre-phased with Eagle 2.3.5 [7], and genotype imputation was performed with Beagle 4.1 (version 08Jun17.d8b) [8].

We performed conditional analysis of the *COL4A3* locus with apparent secondary association peak using GCTA v1.93 $\beta$  [9] and FinnDiane GWAS data as the reference panel.

**Gene-prioritization analysis:** Gene prioritization at each of our top loci was performed using two complementary similarity-based gene prioritization approaches (PoPS v0.1 [10] and MAGMA v1.06b [11]), which integrate GWAS summary statistics with gene set enrichment analysis based on a variety of biological annotation datasets including gene expression, curated pathways, protein-protein interactions, and mouse gene knock-out studies.

For PoPS gene prioritization, MAGMA is first used to calculate gene-level association statistics for 18 383 protein-coding genes in the genome, which is used to assess feature enrichment. PoPS then calculates polygenic priority (PoP) scores for each gene based on its membership to enriched features. For each of our top loci, we annotated the PoPS prioritized gene as the one with the highest PoP score within a 500kb flanking window of each of our lead SNPs. Of note, the *PRNCRI* gene annotated as the nearest gene to SNP rs185299109 was not included in the PoPS protein-coding gene dataset and the CKD-associated SNP rs185299109 located in an intergenic region was also excluded from this analysis.

MAGMA gene prioritization was conducted using a recently developed extension to the method as described and implemented in Benchmarker software [12], enabling the explicit derivation of gene prioritization results from gene set enrichment analysis. Like the Benchmarker approach, we classified genes as members of each gene set using the top 50, 100, and 200 ranked genes, and obtained similar results from all three. To identify the PoPS features that contributed to the prioritization of *COL4A3*, we limited it to the selected marginal gene features (PoPS step 1), multiplied the *COL4A3* beta hats (PoPS step 2) by the *COL4A3* feature's scores, and ranked the features by the highest overall score.

**Gene-level analysis:** SNP summary statistics from the GWAS meta-analysis were aggregated by gene-level regression analysis using two related software programs designed for gene-level analysis, MAGMA v1.06b [11] and PASCAL v2016 [13], using default parameters. Both methods take into account pairwise SNP correlation within a defined gene region (MAGMA 5kb flanking; PASCAL 50kb flanking) to calculate gene-level scores while accounting for linkage disequilibrium. Gene-level significance thresholds were determined by a Bonferroni multiple-testing correction based on the number of genes tested for each of the ten phenotypes

within each software program (number of genes ranged from 18,439-21,790; significance thresholds ranged from  $2.7 \times 10^{-6}$  to  $2.3 \times 10^{-6}$ ).

**Transcriptome-wide association study (TWAS):** MetaXcan [14] was applied to integrate kidney expression quantitative trait locus (eQTL) datasets with the GWAS meta-analysis results and to map disease-associated genes. The *cis*-eQTL data for microdissected human glomerular (N=119) and tubular (N=121) samples were obtained from Susztaklab Kidney Biobank (<https://susztaklab.com/eQTLci/download.php>) [15], and were analyzed jointly to infer differential gene expression in cases vs. controls using MetaXcan software with default parameters. The GTEx Elastic-Net Model pipeline (<https://github.com/hakyimlab/PredictDBPipeline>) was applied to prepare the model used for MetaXcan. The linkage disequilibrium (LD) references were estimated based on genotypes of European individuals from the 1000 Genome Project. Using  $FDR < 0.05$ , the method identified 5,990 coding genes with significant models for glomerular eQTL, and 5,371 coding genes for tubular eQTL. Significant association was defined as  $p < 0.05/2/6,050 = 4.1 \times 10^{-6}$ , i.e., corrected for two tissues and 6,050 genes found in either tubular or glomerular eQTL data.

**Expression quantitative trait loci (eQTL):** eQTL associations were sought from the eQTLGen database for eQTL in whole blood from >30 000 participants (<http://www.eqtlgen.org/>) [16]. Kidney specific eQTL associations were queried from eQTL datasets for glomeruli, tubules [15], and a meta-analysis of four eQTL studies with 451 kidney samples. The meta-analysis of four eQTLs datasets obtained from the Susztak lab, The Cancer Genome Atlas (TCGA), the Genotype-Tissue Expression (GTEx v8), and the Nephrotic Syndrome Study Network (NephQTL) [15, 17–19], was performed using METAL with fixed effects inverse-variance meta-analysis[4].

**Methylation quantitative trait loci (mQTL):** mQTL associations were sought for the lead SNPs in 188 healthy kidney samples (eGFR > 60 and fibrosis < 10%), with Bonferroni threshold ( $p < 1.5 \times 10^{-11}$ ) considered genome-wide significant. DNA methylation of CpG sites were profiled in 188 healthy kidney samples by the Infinium MethylationEPIC Kit and BeadChips (Illumina, USA) and were transformed by an inverse-normal

transformation after quality control using SeSAMe [20]. Genotypes for these samples were profiled by from Axiom Tx and Axiom Biobank arrays and imputed using the multiethnic panel reference from 1000Genomes Phase 3 (NCBI build 37, released in October 2014). The association between CpG site and the SNPs within 1Mb were estimated by linear regression model using MatrixQTL [21]. with covariates including collection site, age, sex, top five genotype principal components (PCs), degree of bisulfite conversion, sample plate, and sentrix position and PEER factors. For the significant CpG sites, we then sought for evidence of association between blood methylation levels and eGFR, or eGFR decline, in 500 individuals with diabetes [22]; we furthermore tested association with DKD in our epigenome-wide association study in 1,304 UK-ROI and FinnDiane participants, analyzed using the Infinium MethylationEPIC Kit and BeadChips (Illumina, USA), following the QC and analysis procedures described earlier for UK-ROI[23]. Meta-analysis of the two data sets was performed with METAL software [4], based on  $p$ -values and direction of effect.

**Multiple trait co-localization (moloc):** To estimate posterior probability that the GWAS lead variant is associated with kidney eQTL (kidney eQTL meta-analysis of N=686 samples, [https://susztaklab.com/Kidney\\_eQTL/eQTLmeta.php](https://susztaklab.com/Kidney_eQTL/eQTLmeta.php)) and mQTL (kidney samples described above, N=188) signals, we performed Bayesian multiple-trait-colocalization (moloc). Lead variants were determined as the variants with  $p$ -value  $< 1 \times 10^{-4}$  within the lead loci identified from the GWAS meta-analysis or MAGMA/PASCAL gene aggregate tests, and available variants within 100kb search window were extracted for moloc analysis. R package moloc (v0.1.0) [24] was used to perform moloc analysis with default parameters  $\text{prior\_var} = c(0.01, 0.1, 0.5)$  and  $\text{priors} = c(1 \times 10^{-4}, 1 \times 10^{-6}, 1 \times 10^{-7})$ . In moloc results,  $\text{Coloc\_ppas\_abc} > 0.8$  was considered evidence of colocalization among all three traits.  $\text{Coloc\_ppas\_ab} > 0.8$  was considered evidence of colocalization between GWAS and mQTL.  $\text{Coloc\_ppas\_ac} > 0.8$  was considered evidence of colocalization between GWAS and eQTL.

**Human kidney gene expression:** For the 29 lead genes or transcripts underlying or located near the lead SNPs, or based on gene-level analyses, TWAS, PoPS, or kidney eQTL data, we studied gene expression in kidneys in human transcriptomics data from nephrectomy samples (433 tubule and 335 glomerulus samples)

[25] and kidney biopsies from the Pima Indian cohort (67 glomerular and 47 tubulointerstitial tissues) [26], and tested for correlation with relevant pathological phenotypes. The microdissected nephrectomy samples were from individuals with varying degree of diabetic and hypertensive kidney disease, and gene expression was defined with RNA sequencing. Pearson correlation  $p$ -values below  $2.2 \times 10^{-4}$  were considered significant, corrected for multiple testing for 29 genes, two tissue compartments, and four phenotypes (eGFR, fibrosis, glomerulosclerosis and group comparison). The study was approved by the institutional review board of the University of Pennsylvania.

In the Pima Indian cohort, gene expression profiling in the first biopsy was performed with Affymetrix gene chip arrays [26], and with Illumina RNA-sequencing for the second biopsy, as described earlier [1]. Available phenotypes included progression to ESRD, measured GFR (mGFR), albumin-to-creatinine ratio (ACR), glycated hemoglobin (HbA1c) and six kidney morphological parameters for both biopsies, and change in the phenotypes between the first and the second study biopsies (27 phenotypes in total) [27]. Pearson correlation  $p$ -values below  $3.2 \times 10^{-5}$  were considered significant, corrected for 29 genes, 2 tissues, and 27 phenotypes;  $p$ -values below  $8.6 \times 10^{-4}$  (i.e. without correction for 27 phenotypes) were considered suggestive. The study was approved by the Institutional Review Board of the National Institute of Diabetes and Digestive and Kidney Diseases.

**Further annotation of the lead variants:** Chromatin 3D conformation interactions with gene transcription start sites (TSS) were queried for the most significant SNPs from the promoter capture Hi-C (PCHiC) data from the [www.chicp.org](http://www.chicp.org) web interface, including data for GM12878 lymphoblastoid cell line and CD34 cells [28], hESC derived cardiomyocytes [29], 16 primary blood cells [30], and pancreatic islets [31]; no data was available for kidney tissue. Interactions with score  $\geq 5$  were considered significant. We queried chromatin accessibility in kidney single-nucleus ATAC-sequencing (snATACseq) data available at [https://susztaklab.com/human\\_kidney/igv/](https://susztaklab.com/human_kidney/igv/) (accessed 24 June 2021) [32]. Detailed gene expression in kidney single cell RNA sequencing (scRNAseq) data was queried in the Human Diabetic Kidney data set (23,980 nuclei) by Wilson *et al.* [33], accessed through <http://humphreyslab.com/SingleCell>. Further epigenetic annotation was sought from the regulomeDB [34], and differential renal gene expression in DKD versus healthy controls from the Ju CKD [35] and Woroniecka [36] data sets in the NephroSeq portal



([www.nephroseq.org](http://www.nephroseq.org)). Of note, samples in the queried Woroniecka [36] data are a subset (N=22) of the more recent RNA sequencing based nephrectomy samples mentioned above (N=433) [25].

### **Genetic correlation of DKD between type 1 and type 2 diabetes and general population kidney traits:**

We calculated the genetic correlation between the DKD traits in type 1 diabetes studies versus type 2 diabetes studies using LD score regression (LDSR) [37] with LDSC v1.0.1 software (<https://github.com/bulik/ldsc>) using the European 1000 genomes LD structure and limited to the HapMap3 SNPs. Valid (non-significant) estimates were obtained only for the two phenotypes with the largest number of participants, DKD (N=26,989) and CKD (N=26,626). We further calculated genetic correlation for the full meta-analysis (type 1 or type 2 diabetes), and separately for the type 1 diabetes and type 2 diabetes meta-analysis results with the following general population kidney traits obtained from the CKDgen consortium: general population microalbuminuria (trans-ethnic, N=348,954 (51,861 cases, 297,093 controls) [38]; albumin-to-creatinine-ratio [ACR] (European-American, N=547361) [38]; ACR in diabetes (trans-ethnic, N=51,541) [38]; CKD (European Americans: N=480,698 (41,395 cases and 439,303 controls) [39]; and eGFR (CKDGen, N=765,348, trans-ethnic, and UK Biobank, N=436,581, Europeans) [40]. Estimates of genetic correlation were obtained for 5 out of the 10 studied DKD phenotypes. Correlation plots were plotted with heatmap.2 function from the R gplots package (v.3.1.1, <https://cran.r-project.org/web/packages/gplots/index.html>).

**LDSR and Mendelian Randomization (MR) of cardiometabolic and other related traits:** LDSR [37] was performed at LDhub (<http://ldsc.broadinstitute.org/>) for 78 glycemic, autoimmune, anthropometric, bone, smoking behavior, lipid, kidney, uric acid, cardiometabolic, and aging related traits (listed in **ESM Table 15**), based on the GWAS summary statistics of the ten DKD phenotypes explored. Variants were filtered to those with MAF  $\geq 1\%$ . LDSR associations with  $p < 6.4 \times 10^{-4}$  were defined significant after Bonferroni correction for 78 traits. To identify causal relationships for significant traits in the LDSR against DKD, we performed summary-based two-sample MR implemented in the R package TwoSampleMR v0.5.6 [41]. For the SNP-trait associations, we selected genetic variants as instrumental variables (IV) that were independently associated with the selected traits ( $p < 5 \times 10^{-8}$ ;  $r^2 < 0.001$  based on the 1000Genomes EUR panel; LD window=10,000 kb) from published GWAS. Palindromic SNPs with intermediate allele frequency (MAF close to 50%) were removed. Traits with less than five IVs were excluded from the MR analysis. Primarily,

we used inverse variance-weighted (IVW) regression, but causality was further assessed using methods less sensitive to pleiotropy/heterogeneity (weighted median and MR-Egger regression) [42]. Heterogeneity of SNP estimates in MR was assessed with Cochran's Q statistic  $p$ -value and the  $I^2$  statistic. The MR-Egger intercept test was used to detect unbalanced horizontal pleiotropy. As all but one significant LDSR associations were for the "All vs. DKD" phenotype with the largest number of included participants, only those results are shown in Figure 6; also association between "Obesity Class I" vs. CKD was tested and significant.

## ESM References

1. Salem RM, Todd JN, Sandholm N, et al (2019) Genome-Wide Association Study of Diabetic Kidney Disease Highlights Biology Involved in Glomerular Basement Membrane Collagen. *J Am Soc Nephrol* 30(10):2000–2016. <https://doi.org/10.1681/ASN.2019030218>
2. Sandholm N, Van Zuydam N, Ahlqvist E, et al (2017) The Genetic Landscape of Renal Complications in Type 1 Diabetes. *J Am Soc Nephrol* 28(2):557–574. <https://doi.org/10.1681/ASN.2016020231>
3. van Zuydam NR, Ahlqvist E, Sandholm N, et al (2018) A Genome-Wide Association Study of Diabetic Kidney Disease in Subjects With Type 2 Diabetes. *Diabetes* 67(7):1414–1427. <https://doi.org/10.2337/db17-0914>
4. Willer CJ, Li Y, Abecasis GR (2010) METAL: fast and efficient meta-analysis of genomewide association scans. *Bioinformatics* 26(17):2190–2191. <https://doi.org/10.1093/bioinformatics/btq340>
5. Pruim RJ, Welch RP, Sanna S, et al (2010) LocusZoom: regional visualization of genome-wide association scan results. *Bioinformatics* 26(18):2336–2337. <https://doi.org/10.1093/bioinformatics/btq419>;
6. Li J, Ji L (2005) Adjusting multiple testing in multilocus analyses using the eigenvalues of a correlation matrix. *Heredity (Edinb)* 95(3):221–227. <https://doi.org/10.1038/sj.hdy.6800717>
7. Loh P-R, Palamara PF, Price AL (2016) Fast and accurate long-range phasing in a UK Biobank cohort. *Nat Genet* 48(7):811–816. <https://doi.org/10.1038/ng.3571>
8. Browning BL, Browning SR (2016) Genotype Imputation with Millions of Reference Samples. *Am J Hum Genet* 98(1):116–126. <https://doi.org/10.1016/j.ajhg.2015.11.020>
9. Yang J, Ferreira T, Morris AP, et al (2012) Conditional and joint multiple-SNP analysis of GWAS summary statistics identifies additional variants influencing complex traits. *Nat Genet* 44(4):369–375, S1-3. <https://doi.org/10.1038/ng.2213>
10. Weeks EM, Ulirsch JC, Cheng NY, et al (2020) Leveraging polygenic enrichments of gene features to predict genes underlying complex traits and diseases. *medRxiv* 2020.09.08.20190561. <https://doi.org/10.1101/2020.09.08.20190561>
11. de Leeuw CA, Mooij JM, Heskes T, Posthuma D (2015) MAGMA: generalized gene-set analysis of GWAS data. *PLoS ComputBiol* 11(4):e1004219. <https://doi.org/10.1371/journal.pcbi.1004219>
12. Fine RS, Pers TH, Amariuta T, Raychaudhuri S, Hirschhorn JN (2019) Benchmarker: An Unbiased, Association-Data-Driven Strategy to Evaluate Gene Prioritization Algorithms. *Am J Hum Genet* 104(6):1025–1039. <https://doi.org/10.1016/j.ajhg.2019.03.027>
13. Lamparter D, Marbach D, Rueedi R, Kutalik Z, Bergmann S (2016) Fast and Rigorous Computation of Gene and Pathway Scores from SNP-Based Summary Statistics. *PLoS ComputBiol* 12(1):e1004714. <https://doi.org/10.1371/journal.pcbi.1004714>
14. Barbeira AN, Dickinson SP, Bonazzola R, et al (2018) Exploring the phenotypic consequences of tissue specific gene expression variation inferred from GWAS summary statistics. *Nat Commun* 9(1):1825. <https://doi.org/10.1038/s41467-018-03621-1>
15. Qiu C, Huang S, Park J, et al (2018) Renal compartment-specific genetic variation analyses identify new pathways in chronic kidney disease. *NatMed*. <https://doi.org/10.1038/s41591-018-0194-4>

16. Võsa U, Claringbould A, Westra H-J, et al (2018) Unraveling the polygenic architecture of complex traits using blood eQTL metaanalysis. *bioRxiv (Journal Article):447367*. <https://doi.org/10.1101/447367>
17. Ko Y-A, Yi H, Qiu C, et al (2017) Genetic-Variation-Driven Gene-Expression Changes Highlight Genes with Important Functions for Kidney Disease. *Am J Hum Genet* 100(6):940–953. <https://doi.org/10.1016/j.ajhg.2017.05.004>
18. GTEx Consortium (2020) The GTEx Consortium atlas of genetic regulatory effects across human tissues. *Science* 369(6509):1318–1330. <https://doi.org/10.1126/science.aaz1776>
19. Gillies CE, Putler R, Menon R, et al (2018) An eQTL Landscape of Kidney Tissue in Human Nephrotic Syndrome. *Am J Hum Genet* 103(2):232–244. <https://doi.org/10.1016/j.ajhg.2018.07.004>
20. Zhou W, Triche TJ, Laird PW, Shen H (2018) SeSAME: reducing artifactual detection of DNA methylation by Infinium BeadChips in genomic deletions. *Nucleic Acids Res* 46(20):e123. <https://doi.org/10.1093/nar/gky691>
21. Shabalin AA (2012) Matrix eQTL: ultra fast eQTL analysis via large matrix operations. *Bioinformatics* 28(10):1353–1358. <https://doi.org/10.1093/bioinformatics/bts163>
22. Sheng X, Qiu C, Liu H, et al (2020) Systematic integrated analysis of genetic and epigenetic variation in diabetic kidney disease. *PNAS* 117(46):29013–29024. <https://doi.org/10.1073/pnas.2005905117>
23. Smyth LJ, Kilner J, Nair V, et al (2021) Assessment of differentially methylated loci in individuals with end-stage kidney disease attributed to diabetic kidney disease: an exploratory study. *ClinEpigenetics* 13(1):99-021-01081–x. <https://doi.org/10.1186/s13148-021-01081-x>
24. Giambartolomei C, Zhenli Liu J, Zhang W, et al (2018) A Bayesian framework for multiple trait colocalization from summary association statistics. *Bioinformatics* 34(15):2538–2545. <https://doi.org/10.1093/bioinformatics/bty147>
25. Guan Y, Liang X, Ma Z, et al (2021) A single genetic locus controls both expression of DPEP1/CHMP1A and kidney disease development via ferroptosis. *Nat Commun* 12(1):5078. <https://doi.org/10.1038/s41467-021-25377-x>
26. Nair V, Komorowsky CV, Weil EJ, et al (2018) A molecular morphometric approach to diabetic kidney disease can link structure to function and outcome. *Kidney Int* 93(2):439–449. <https://doi.org/10.1016/j.kint.2017.08.013>
27. Looker HC, Mauer M, Saulnier P-J, et al (2019) Changes in Albuminuria But Not GFR are Associated with Early Changes in Kidney Structure in Type 2 Diabetes. *J Am Soc Nephrol* 30(6):1049–1059. <https://doi.org/10.1681/ASN.2018111166>
28. Mifsud B, Tavares-Cadete F, Young AN, et al (2015) Mapping long-range promoter contacts in human cells with high-resolution capture Hi-C. *NatGenet* 47(6):598–606. <https://doi.org/10.1038/ng.3286>
29. Choy MK, Javierre BM, Williams SG, et al (2018) Promoter interactome of human embryonic stem cell-derived cardiomyocytes connects GWAS regions to cardiac gene networks. *NatCommun* 9(1):2526-018-04931–0. <https://doi.org/10.1038/s41467-018-04931-0>
30. Javierre BM, Burren OS, Wilder SP, et al (2016) Lineage-Specific Genome Architecture Links Enhancers and Non-coding Disease Variants to Target Gene Promoters. *Cell* 167(5):1369-1384.e19
31. Miguel-Escalada I, Bonàs-Guarch S, Cebola I, et al (2018) Human pancreatic islet 3D chromatin architecture provides insights into the genetics of type 2 diabetes. *bioRxiv (Journal Article):400291*

32. Sheng X, Ma Z, Wu J, et al (2020) Mapping the genetic architecture of human traits to cell types in the kidney identifies mechanisms of disease and potential treatments. *bioRxiv* 2020.11.09.375592. <https://doi.org/10.1101/2020.11.09.375592>
33. Wilson PC, Wu H, Kirita Y, et al (2019) The single-cell transcriptomic landscape of early human diabetic nephropathy. *Proc Natl Acad Sci U S A* 116(39):19619–19625. <https://doi.org/10.1073/pnas.1908706116>
34. Boyle AP, Hong EL, Hariharan M, et al (2012) Annotation of functional variation in personal genomes using RegulomeDB. *Genome Res* 22(9):1790–1797. <https://doi.org/10.1101/gr.137323.112>;
35. Ju W, Greene CS, Eichinger F, et al (2013) Defining cell-type specificity at the transcriptional level in human disease. *Genome Res* 23(11):1862–1873. <https://doi.org/10.1101/gr.155697.113>
36. Woroniecka KI, Park AS, Mohtat D, Thomas DB, Pullman JM, Susztak K (2011) Transcriptome analysis of human diabetic kidney disease. *Diabetes* 60(9):2354–2369. <https://doi.org/10.2337/db10-1181>
37. Bulik-Sullivan BK, Loh PR, Finucane HK, et al (2015) LD Score regression distinguishes confounding from polygenicity in genome-wide association studies. *NatGenet* 47(3):291–295. <https://doi.org/10.1038/ng.3211>
38. Teumer A, Li Y, Ghasemi S, et al (2019) Genome-wide association meta-analyses and fine-mapping elucidate pathways influencing albuminuria. *Nat Commun* 10(1):4130. <https://doi.org/10.1038/s41467-019-11576-0>
39. Wuttke M, Li Y, Li M, et al (2019) A catalog of genetic loci associated with kidney function from analyses of a million individuals. *Nat Genet* 51(6):957–972. <https://doi.org/10.1038/s41588-019-0407-x>
40. Stanzick KJ, Li Y, Schlosser P, et al (2021) Discovery and prioritization of variants and genes for kidney function in >1.2 million individuals. *Nat Commun* 12(1):4350. <https://doi.org/10.1038/s41467-021-24491-0>
41. Hemani G, Zheng J, Elsworth B, et al (2018) The MR-Base platform supports systematic causal inference across the human phenome. *Elife* 7:e34408. <https://doi.org/10.7554/eLife.34408>
42. Bowden J, Davey Smith G, Haycock PC, Burgess S (2016) Consistent Estimation in Mendelian Randomization with Some Invalid Instruments Using a Weighted Median Estimator. *Genet Epidemiol* 40(4):304–314. <https://doi.org/10.1002/gepi.21965>
43. Levey AS, Bosch JP, Lewis JB, Greene T, Rogers N, Roth D (1999) A more accurate method to estimate glomerular filtration rate from serum creatinine: a new prediction equation. Modification of Diet in Renal Disease Study Group. *AnnInternMed* 130(6):461–470
44. Levey AS, Stevens LA (2010) Estimating GFR using the CKD Epidemiology Collaboration (CKD-EPI) creatinine equation: more accurate GFR estimates, lower CKD prevalence estimates, and better risk predictions. *AmJKidney Dis* 55(4):622–627. <https://doi.org/10.1053/j.ajkd.2010.02.337>;
45. Levey AS, Coresh J, Greene T, et al (2007) Expressing the Modification of Diet in Renal Disease Study equation for estimating glomerular filtration rate with standardized serum creatinine values. *ClinChem* 53(4):766–772
46. Pilling LC, Atkins JL, Bowman K, et al (2016) Human longevity is influenced by many genetic variants: evidence from 75,000 UK Biobank participants. *Aging (Albany NY)* 8(3):547–560. <https://doi.org/10.18632/aging.100930>

47. Lango Allen H, Estrada K, Lettre G, et al (2010) Hundreds of variants clustered in genomic loci and biological pathways affect human height. *Nature* 467(7317):832–838. <https://doi.org/10.1038/nature09410>
48. Speliotes EK, Willer CJ, Berndt SI, et al (2010) Association analyses of 249,796 individuals reveal 18 new loci associated with body mass index. *NatGenet* 42(11):937–948. <https://doi.org/10.1038/ng.686>;
49. Bradfield JP, Taal HR, Timpson NJ, et al (2012) A genome-wide association meta-analysis identifies new childhood obesity loci. *Nat Genet* 44(5):526–531. <https://doi.org/10.1038/ng.2247>
50. Taal HR, Pourcain BS, Thiering E, et al (2012) Common variants at 12q15 and 12q24 are associated with infant head circumference. *Nat Genet* 44(5):532–538. <https://doi.org/10.1038/ng.2238>
51. Horikoshi M, Yaghoobkar H, Mook-Kanamori DO, et al (2013) New loci associated with birth weight identify genetic links between intrauterine growth and adult height and metabolism. *Nat Genet* 45(1):76–82. <https://doi.org/10.1038/ng.2477>
52. Cousminer DL, Berry DJ, Timpson NJ, et al (2013) Genome-wide association and longitudinal analyses reveal genetic loci linking pubertal height growth, pubertal timing and childhood adiposity. *Hum Mol Genet* 22(13):2735–2747. <https://doi.org/10.1093/hmg/ddt104>
53. Berndt SI, Gustafsson S, Mägi R, et al (2013) Genome-wide meta-analysis identifies 11 new loci for anthropometric traits and provides insights into genetic architecture. *Nat Genet* 45(5):501–512. <https://doi.org/10.1038/ng.2606>
54. van der Valk RJP, Kreiner-Møller E, Kooijman MN, et al (2015) A novel common variant in DCST2 is associated with length in early life and height in adulthood. *Hum Mol Genet* 24(4):1155–1168. <https://doi.org/10.1093/hmg/ddu510>
55. Shungin D, Winkler TW, Croteau-Chonka DC, et al (2015) New genetic loci link adipose and insulin biology to body fat distribution. *Nature* 518(7538):187–196. <https://doi.org/10.1038/nature14132>
56. Chan Y, Salem RM, Hsu Y-HH, et al (2015) Genome-wide Analysis of Body Proportion Classifies Height-Associated Variants by Mechanism of Action and Implicates Genes Important for Skeletal Development. *Am J Hum Genet* 96(5):695–708. <https://doi.org/10.1016/j.ajhg.2015.02.018>
57. Lu Y, Day FR, Gustafsson S, et al (2016) New loci for body fat percentage reveal link between adiposity and cardiometabolic disease risk. *Nat Commun* 7:10495. <https://doi.org/10.1038/ncomms10495>
58. Horikoshi M, Beaumont RN, Day FR, et al (2016) Genome-wide associations for birth weight and correlations with adult disease. *Nature* 538(7624):248–252. <https://doi.org/10.1038/nature19806>
59. Warrington NM, Beaumont RN, Horikoshi M, et al (2019) Maternal and fetal genetic effects on birth weight and their relevance to cardio-metabolic risk factors. *Nat Genet* 51(5):804–814. <https://doi.org/10.1038/s41588-019-0403-1>
60. Moffatt MF, Kabesch M, Liang L, et al (2007) Genetic variants regulating ORMDL3 expression contribute to the risk of childhood asthma. *Nature* 448(7152):470–473. <https://doi.org/10.1038/nature06014>
61. Dubois PCA, Trynka G, Franke L, et al (2010) Multiple common variants for celiac disease influencing immune gene expression. *Nat Genet* 42(4):295–302. <https://doi.org/10.1038/ng.543>
62. International Multiple Sclerosis Genetics Consortium, Wellcome Trust Case Control Consortium 2, Sawcer S, et al (2011) Genetic risk and a primary role for cell-mediated immune mechanisms in multiple sclerosis. *Nature* 476(7359):214–219. <https://doi.org/10.1038/nature10251>

63. Okada Y, Wu D, Trynka G, et al (2014) Genetics of rheumatoid arthritis contributes to biology and drug discovery. *Nature* 506(7488):376–381. <https://doi.org/10.1038/nature12873>
64. Liu JZ, van Sommeren S, Huang H, et al (2015) Association analyses identify 38 susceptibility loci for inflammatory bowel disease and highlight shared genetic risk across populations. *Nat Genet* 47(9):979–986. <https://doi.org/10.1038/ng.3359>
65. Cordell HJ, Han Y, Mells GF, et al (2015) International genome-wide meta-analysis identifies new primary biliary cirrhosis risk loci and targetable pathogenic pathways. *Nat Commun* 6:8019. <https://doi.org/10.1038/ncomms9019>
66. Paternoster L, Standl M, Waage J, et al (2015) Multi-ancestry genome-wide association study of 21,000 cases and 95,000 controls identifies new risk loci for atopic dermatitis. *Nat Genet* 47(12):1449–1456. <https://doi.org/10.1038/ng.3424>
67. Bentham J, Morris DL, Graham DSC, et al (2015) Genetic association analyses implicate aberrant regulation of innate and adaptive immunity genes in the pathogenesis of systemic lupus erythematosus. *Nat Genet* 47(12):1457–1464. <https://doi.org/10.1038/ng.3434>
68. Ji S-G, Juran BD, Mucha S, et al (2017) Genome-wide association study of primary sclerosing cholangitis identifies new risk loci and quantifies the genetic relationship with inflammatory bowel disease. *Nat Genet* 49(2):269–273. <https://doi.org/10.1038/ng.3745>
69. Estrada K, Styrkarsdottir U, Evangelou E, et al (2012) Genome-wide meta-analysis identifies 56 bone mineral density loci and reveals 14 loci associated with risk of fracture. *Nat Genet* 44(5):491–501. <https://doi.org/10.1038/ng.2249>
70. Zheng H-F, Forgetta V, Hsu Y-H, et al (2015) Whole-genome sequencing identifies EN1 as a determinant of bone density and fracture. *Nature* 526(7571):112–117. <https://doi.org/10.1038/nature14878>
71. Dastani Z, Hivert M-F, Timpson N, et al (2012) Novel loci for adiponectin levels and their influence on type 2 diabetes and metabolic traits: a multi-ethnic meta-analysis of 45,891 individuals. *PLoS Genet* 8(3):e1002607. <https://doi.org/10.1371/journal.pgen.1002607>
72. Nikpay M, Goel A, Won HH, et al (2015) A comprehensive 1,000 Genomes-based genome-wide association meta-analysis of coronary artery disease. *NatGenet* 47(10):1121–1130. <https://doi.org/10.1038/ng.3396>
73. Malik R, Traylor M, Pulit SL, et al (2016) Low-frequency and common genetic variation in ischemic stroke: The METASTROKE collaboration. *Neurology* 86(13):1217–1226. <https://doi.org/10.1212/WNL.0000000000002528>
74. Saxena R, Hivert MF, Langenberg C, et al (2010) Genetic variation in GIPR influences the glucose and insulin responses to an oral glucose challenge. *NatGenet* 42(2):142–148. <https://doi.org/10.1038/ng.521>
75. Dupuis J, Langenberg C, Prokopenko I, et al (2010) New genetic loci implicated in fasting glucose homeostasis and their impact on type 2 diabetes risk. *NatGenet* 42(2):105–116. <https://doi.org/10.1038/ng.520>;
76. Soranzo N, Sanna S, Wheeler E, et al (2010) Common variants at 10 genomic loci influence hemoglobin A<sub>1c</sub> levels via glycemic and nonglycemic pathways. *Diabetes* 59(12):3229–3239. <https://doi.org/10.2337/db10-0502>
77. Manning AK, Hivert MF, Scott RA, et al (2012) A genome-wide approach accounting for body mass index identifies genetic variants influencing fasting glycemic traits and insulin resistance. *NatGenet* 44(6):659–669. <https://doi.org/10.1038/ng.2274>

78. Morris AP, Voight BF, Teslovich TM, et al (2012) Large-scale association analysis provides insights into the genetic architecture and pathophysiology of type 2 diabetes. *NatGenet* 44(9):981–990. <https://doi.org/10.1038/ng.2383>
79. Teumer A, Tin A, Sorice R, et al (2016) Genome-wide Association Studies Identify Genetic Loci Associated With Albuminuria in Diabetes. *Diabetes* 65(3):803–817. <https://doi.org/10.2337/db15-1313>
80. Pattaro C, Teumer A, Gorski M, et al (2016) Genetic associations at 53 loci highlight cell types and biological pathways relevant for kidney function. *NatCommun* 7(Journal Article):10023. <https://doi.org/10.1038/ncomms10023>
81. Teslovich TM, Musunuru K, Smith AV, et al (2010) Biological, clinical and population relevance of 95 loci for blood lipids. *Nature* 466(7307):707–713. <https://doi.org/10.1038/nature09270>
82. Köttgen A, Albrecht E, Teumer A, et al (2013) Genome-wide association analyses identify 18 new loci associated with serum urate concentrations. *Nat Genet* 45(2):145–154. <https://doi.org/10.1038/ng.2500>
83. Tobacco and Genetics Consortium (2010) Genome-wide meta-analyses identify multiple loci associated with smoking behavior. *NatGenet* 42(5):441–447. <https://doi.org/10.1038/ng.571>
84. Erzurumluoglu AM, Liu M, Jackson VE, et al (2020) Meta-analysis of up to 622,409 individuals identifies 40 novel smoking behaviour associated genetic loci. *Mol Psychiatry* 25(10):2392–2409. <https://doi.org/10.1038/s41380-018-0313-0>
85. Huffman JE, Albrecht E, Teumer A, et al (2015) Modulation of genetic associations with serum urate levels by body-mass-index in humans. *PLoS One* 10(3):e0119752. <https://doi.org/10.1371/journal.pone.0119752>



**ESM Table 1: A total of ten case – control definitions for diabetic kidney disease (DKD; used as a general term to describe renal complications in diabetes)**

| Phenotype             | Cases                                                                                 | Controls                                           | Note                                                                                                                      |
|-----------------------|---------------------------------------------------------------------------------------|----------------------------------------------------|---------------------------------------------------------------------------------------------------------------------------|
| <b>All vs. Ctrl</b>   | microalbuminuria or macroalbuminuria or ESRD                                          | Normal AER                                         | Phenotype abbreviated as "DN" (diabetic nephropathy) in SUMMIT                                                            |
| <b>Severe DKD</b>     | macroalbuminuria or ESRD                                                              | Normal AER                                         | Phenotype abbreviated as "MACRO" in SUMMIT; as "DN" in DNCRI                                                              |
| <b>Micro</b>          | microalbuminuria                                                                      | Normal AER                                         |                                                                                                                           |
| <b>Macro</b>          | macroalbuminuria                                                                      | Normal AER                                         | Not analyzed in SUMMIT                                                                                                    |
| <b>ESRD</b>           | ESRD                                                                                  | Normal AER                                         |                                                                                                                           |
| <b>ESRD vs. All</b>   | ESRD                                                                                  | no ESRD                                            |                                                                                                                           |
| <b>ESRD vs. macro</b> | ESRD                                                                                  | macroalbuminuria                                   | Not analyzed in SUMMIT                                                                                                    |
| <b>CKD</b>            | eGFR < 60 ml/min/1.73m <sup>2</sup>                                                   | eGFR ≥ 60 ml/min/1.73m <sup>2</sup>                |                                                                                                                           |
| <b>CKD extremes</b>   | ESRD or eGFR < 15 ml/min/1.73m <sup>2</sup>                                           | eGFR ≥ 60 ml/min/1.73m <sup>2</sup>                | Not analyzed in SUMMIT                                                                                                    |
| <b>CKD-DKD</b>        | ESRD, or eGFR < 60 ml/min/1.73m <sup>2</sup> AND microalbuminuria or macroalbuminuria | normal AER and eGFR ≥ 60 ml/min/1.73m <sup>2</sup> | Some cohorts in SUMMIT required at least one measurement with "high microalbuminruia", i.e. AER ≥150 mg/24, or equivalent |

The subjects were classified as normal AER, microalbuminuria or macroalbuminuria based on two out of three consecutive urine samples surpassing the required thresholds:

|                  |                                                                                                                                                                                                                                                                   |
|------------------|-------------------------------------------------------------------------------------------------------------------------------------------------------------------------------------------------------------------------------------------------------------------|
| Normal AER       | AER <20 µg/min (overnight collection) OR<br>AER <30 mg/24 h (24h urine collection) OR<br>ACR <2.5 mg/mmol for men<br>ACR <3.5 for women (spot/ any urine)<br>Diabetes duration ≥10 years for type 2 diabetes, ≥ 15 years for type 1 diabetes                      |
| Microalbuminuria | AER ≥20 AND <100 µg/min (overnight collection) OR<br>AER ≥30 AND <150 mg/24 hr (24h urine collection) OR<br>ACR ≥2.5 AND <12.5 for men<br>ACR ≥3.5 AND <17.5 for women (spot/ any urine).                                                                         |
| Macroalbuminuria | AER ≥200 µg/min (overnight collection) OR<br>AER ≥300 mg/24 h (24h urine collection) OR<br>ACR ≥25 mg/mmol for men<br>ACR ≥35 for women (spot/ any urine)<br>*Due to study designs, in some SUMMIT studies one measurement above these thresholds was sufficient. |

ESRD: End-stage renal disease, dialysis or renal transplant (or eGFR < 15 ml/min/1.73m<sup>2</sup> in SUMMIT)  
eGFR was estimated based on serum creatinine and calculated either with the MDRD4<sup>(ref)</sup> [43] or the CKD-EPI[44] formula depending on the study. In SUMMIT, when IDMS-calibrated serum creatinine was used, the MDRD4 formula was multiplied by 175/186.[45]



**ESM Table 3: Key characteristics of the genotyping and statistical analyses in DNCRI and SUMMIT cohorts.**

|                                             | DNCRI                                                                                                                                                                                                                                     | SUMMIT-1 and SUMMIT-2                                                                                                                                                                                                                                                                                                                                                             |
|---------------------------------------------|-------------------------------------------------------------------------------------------------------------------------------------------------------------------------------------------------------------------------------------------|-----------------------------------------------------------------------------------------------------------------------------------------------------------------------------------------------------------------------------------------------------------------------------------------------------------------------------------------------------------------------------------|
| N studies                                   | 17                                                                                                                                                                                                                                        | 3 (SUMMIT-1), 5 (SUMMIT-2)                                                                                                                                                                                                                                                                                                                                                        |
| N samples (max)                             | 19,406                                                                                                                                                                                                                                    | 1,741 (SUMMIT-1), 6,000 (SUMMIT-2)                                                                                                                                                                                                                                                                                                                                                |
| Genotyping chips                            | HumanCoreExome Bead arrays 12-1.0, 12-1.1, and 24-1.0                                                                                                                                                                                     | Illumina Omni express array, Affymetrix SNP 6.0 array, Illumina 610Quad assay                                                                                                                                                                                                                                                                                                     |
| Genotype calling                            | zCall                                                                                                                                                                                                                                     | GenomeStudio, CHIAMO                                                                                                                                                                                                                                                                                                                                                              |
| Main pre-imputation Quality control filters | SNP call rates <95%, excessive deviation from Hardy–Weinberg equilibrium; sample call rates <98%, sex mismatch, extreme heterozygosity, principal component analysis to exclude outliers with evidence of non-European ancestry           | SNP call rate <95%, MAF<1%, HWE $p < 10^{-6}$ or $p < 10^{-7}$ , evidence of plate differences ( $p < 1e-7$ ). Sample call rate <95%, extremely high/low heterozygosity (>3 sd. or >4 sd. from mean), Admixture (PC1 or PC2 > 6 sd. away from mean + visual evaluation)                                                                                                           |
| Imputation reference panel                  | 1000Genomes Phase 3                                                                                                                                                                                                                       | 1000Genomes Phase 1                                                                                                                                                                                                                                                                                                                                                               |
| Imputation software                         | Minimac3/Minimac3-omp (version 1.0.14)                                                                                                                                                                                                    | Prephasing with SHAPE-IT v2; Imputation with IMPUTEv2                                                                                                                                                                                                                                                                                                                             |
| Covariates                                  | Age, sex, diabetes duration, genetic principal components, study specific covariates (e.g. site or genotyping batch). Excluded closely related individuals.                                                                               | Age, gender, duration of diabetes, genetic principal components. Excluded closely related individuals.                                                                                                                                                                                                                                                                            |
| Main post-analysis SNP QC filters           | <ul style="list-style-type: none"> <li>•Imputation quality score: <math>INFO \geq 0.3</math></li> <li>•Minor allele count <math>\geq 10</math> in cases and in controls</li> <li>•Marker must be present in at least 2 studies</li> </ul> | <ul style="list-style-type: none"> <li>•Imputation quality score: <math>INFO \geq 0.4</math></li> <li>•Minor allele count <math>\geq 10</math> in cases and in controls</li> <li>•MAF <math>\geq 0.01</math></li> <li>•SUMMIT-2: Marker must be present in at least 2 studies (not applied for the three additional phenotypes available only in SDR, GoDARTS 1 and 2)</li> </ul> |
| Analysis method and software                | SNPtest, additive score test                                                                                                                                                                                                              | SNPtest, additive score test. Note: in original studies, <i>P</i> values of association were estimated using EMMAX mixed model including related individuals, while only effect size estimates were obtained from SNPtest (excluding related individuals).                                                                                                                        |
| Meta-analysis                               | Inverse-variance fixed effects meta-analysis (METAL software)                                                                                                                                                                             | Inverse-variance fixed effects meta-analysis (GWAMA or METAL)                                                                                                                                                                                                                                                                                                                     |

**ESM Table 4: List of related traits studied with LD score regression.**

| <b>Trait</b>                                                      | <b>PMID</b> | <b>Category</b> | <b>ethnicity</b> |
|-------------------------------------------------------------------|-------------|-----------------|------------------|
| Mothers age at death                                              | 27015805    | aging           | European         |
| Parents age at death                                              | 27015805    | aging           | European         |
| Fathers age at death                                              | 27015805    | aging           | European         |
| Height_2010                                                       | 20881960    | anthropometric  | European         |
| Body mass index                                                   | 20935630    | anthropometric  | European         |
| Childhood obesity                                                 | 22484627    | anthropometric  | European         |
| Infant head circumference                                         | 22504419    | anthropometric  | European         |
| Child birth weight                                                | 23202124    | anthropometric  | European         |
| Difference in height between childhood and adulthood;<br>age 8    | 23449627    | anthropometric  | European         |
| Difference in height between adolescence and adulthood;<br>age 14 | 23449627    | anthropometric  | European         |
| Height; Females at age 10 and males at age 12                     | 23449627    | anthropometric  | European         |
| Obesity class 1                                                   | 23563607    | anthropometric  | European         |
| Overweight                                                        | 23563607    | anthropometric  | European         |
| Obesity class 2                                                   | 23563607    | anthropometric  | European         |
| Obesity class 3                                                   | 23563607    | anthropometric  | European         |
| Extreme bmi                                                       | 23563607    | anthropometric  | European         |
| Extreme height                                                    | 23563607    | anthropometric  | European         |
| Extreme waist-to-hip ratio                                        | 23563607    | anthropometric  | European         |
| Child birth length                                                | 25281659    | anthropometric  | European         |
| Waist-to-hip ratio                                                | 25673412    | anthropometric  | European         |
| Waist circumference                                               | 25673412    | anthropometric  | European         |
| Hip circumference                                                 | 25673412    | anthropometric  | European         |
| Sitting height ratio                                              | 25865494    | anthropometric  | European         |
| Body fat                                                          | 26833246    | anthropometric  | Mixed            |
| Birth weight                                                      | 27680694    | anthropometric  | European         |
| Offspring birth weight                                            | 31043758    | anthropometric  | European         |
| Offspring birth weight (maternal effect)                          | 31043758    | anthropometric  | European         |
| Offspring birth weight                                            | 31043758    | anthropometric  | Mixed            |
| Own birth weight                                                  | 31043758    | anthropometric  | European         |
| Own birth weight                                                  | 31043758    | anthropometric  | Mixed            |
| Own birth weight (fetal effect)                                   | 31043758    | anthropometric  | European         |
| Asthma                                                            | 17611496    | autoimmune      | European         |
| Celiac disease                                                    | 20190752    | autoimmune      | European         |
| Multiple sclerosis                                                | 21833088    | autoimmune      | European         |
| Rheumatoid Arthritis                                              | 24390342    | autoimmune      | European         |
| Inflammatory Bowel Disease (Euro)                                 | 26192919    | autoimmune      | European         |
| Crohns disease                                                    | 26192919    | autoimmune      | European         |
| Ulcerative colitis                                                | 26192919    | autoimmune      | European         |
| Primary biliary cirrhosis                                         | 26394269    | autoimmune      | European         |
| Eczema                                                            | 26482879    | autoimmune      | Mixed            |
| Systemic lupus erythematosus                                      | 26502338    | autoimmune      | European         |
| Primary sclerosing cholangitis                                    | 27992413    | autoimmune      | Mixed            |
| Femoral neck bone mineral density                                 | 22504420    | bone            | Mixed            |
| Lumbar spine bone mineral density                                 | 22504420    | bone            | Mixed            |
| Lumbar Spine bone mineral density                                 | 26367794    | bone            | Mixed            |
| Femoral Neck bone mineral density                                 | 26367794    | bone            | Mixed            |
| Forearm Bone mineral density                                      | 26367794    | bone            | Mixed            |
| Adiponectin                                                       | 22479202    | cardiometabolic | Mixed            |
| Coronary artery disease                                           | 26343387    | cardiometabolic | Mixed            |
| Ischemic stroke                                                   | 26935894    | cardiometabolic | Mixed            |
| 2hr glucose adjusted for BMI                                      | 20081857    | glycemic        | European         |

|                                                    |          |                   |          |
|----------------------------------------------------|----------|-------------------|----------|
| HOMA-IR                                            | 20081858 | glycemic          | European |
| HOMA-B                                             | 20081858 | glycemic          | European |
| Fasting proinsulin                                 | 20081858 | glycemic          | European |
| HbA1C                                              | 20858683 | glycemic          | European |
| Fasting glucose main effect                        | 22581228 | glycemic          | European |
| Fasting insulin main effect                        | 22581228 | glycemic          | European |
| Type 2 Diabetes                                    | 22885922 | glycemic          | European |
| Urinary albumin-to-creatinine ratio                | 26631737 | kidney            | European |
| Urinary albumin-to-creatinine ratio (non-diabetes) | 26631737 | kidney            | European |
| Chronic Kidney Disease                             | 26831199 | kidney            | Mixed    |
| Serum cystatin c                                   | 26831199 | kidney            | Mixed    |
| Serum creatinine                                   | 26831199 | kidney            | Mixed    |
| Serum creatinine (non-diabetes)                    | 26831199 | kidney            | Mixed    |
| Triglycerides                                      | 20686565 | lipids            | European |
| HDL cholesterol                                    | 20686565 | lipids            | European |
| LDL cholesterol                                    | 20686565 | lipids            | European |
| Total Cholesterol                                  | 20686565 | lipids            | European |
| Urate                                              | 23263486 | other             | European |
| Former vs Current smoker                           | 20418890 | smoking_behaviour | European |
| Ever vs never smoked                               | 20418890 | smoking_behaviour | European |
| Cigarettes smoked per day                          | 20418890 | smoking_behaviour | European |
| Age of smoking initiation                          | 20418890 | smoking_behaviour | European |
| Smoking Initiation                                 | 30617275 | smoking_behaviour | European |
| Smoking Cessation                                  | 30617275 | smoking_behaviour | European |
| Cigarettes Per Day                                 | 30617275 | smoking_behaviour | European |
| Pack Years                                         | 30617275 | smoking_behaviour | European |
| Serumurate overweight                              | 25811787 | uric_acid         | European |

PMID: PubMed ID. See list of references on ESM References, page 11.

|               |               |               |
|---------------|---------------|---------------|
| 27015805 [46] | 17611496 [60] | 20081857 [74] |
| 20881960 [47] | 20190752 [61] | 20081858 [75] |
| 20935630 [48] | 21833088 [62] | 20858683 [76] |
| 22484627 [49] | 24390342 [63] | 22581228 [77] |
| 22504419 [50] | 26192919 [64] | 22885922 [78] |
| 23202124 [51] | 26394269 [65] | 26631737 [79] |
| 23449627 [52] | 26482879 [66] | 26831199 [80] |
| 23563607 [53] | 26502338 [67] | 20686565 [81] |
| 25281659 [54] | 27992413 [68] | 23263486 [82] |
| 25673412 [55] | 22504420 [69] | 20418890 [83] |
| 25865494 [56] | 26367794 [70] | 30617275 [84] |
| 26833246 [57] | 22479202 [71] | 25811787 [85] |
| 27680694 [58] | 26343387 [72] |               |
| 31043758 [59] | 26935894 [73] |               |

**ESM Table 5: Association details for the novel genome-wide significant locus rs72831309 in *TENM2*.** In the meta-analysis, rs72831309 (chr5:166978230) minor A allele was considered the effect allele, major G as the non-effect allele.

| COHORT          | EAF         | BETA        | SE          | OR          | OR_L95 | OR_U95 | P                           | INFO | N           |
|-----------------|-------------|-------------|-------------|-------------|--------|--------|-----------------------------|------|-------------|
| GWU_GOKIND      | 0.02        | -0.11       | 0.76        | 0.88        | 0.20   | 3.93   | 0.88                        | 0.38 | 578         |
| UK_ROI          | 0.03        | 0.57        | 0.49        | 1.40        | 0.53   | 3.68   | 0.25                        | 0.53 | 699         |
| JOSLIN          | 0.03        | 0.33        | 0.36        | 1.15        | 0.57   | 2.33   | 0.36                        | 0.51 | 1415        |
| FinnDiane       | 0.05        | 0.82        | 0.17        | 1.60        | 1.15   | 2.22   | 1.0×10 <sup>-6</sup>        | 0.66 | 3059        |
| EURODIAB        | 0.03        | 1.36        | 0.51        | 3.89        | 1.43   | 10.54  | 0.008                       | 0.52 | 567         |
| SUMMIT-2 meta   | 0.03        | 0.69        | 0.31        | 1.99        | 1.08   | 3.67   | 0.028                       | NA   | 1552        |
| <b>Meta all</b> | <b>0.04</b> | <b>0.73</b> | <b>0.13</b> | <b>2.08</b> | 1.62   | 2.67   | <b>9.82×10<sup>-9</sup></b> |      | <b>8322</b> |

EAF: effect allele (minor A allele) frequency. BETA: effect size estimate. SE: standard error for BETA. OR: odds ratio. OR\_L95 and OR\_U95: Lower and upper confidence intervals. P: p-value. INFO: imputation quality info metrics. N: Number of samples in the study.

**ESM Table 6: Highly correlated reconstituted gene-sets that make-up the “basement membrane” meta-gene set derived in Marouli et al.** The “Genes prioritized” column contains all genes prioritized in MAGMA by one of these 26 gene-sets, including the “FBLN2 PPI subnetwork” gene set that prioritized *COL4A3* for Severe DKD.

| GENE-SET ID            | GENE-SET DESCRIPTION                        | GENES PRIORITIZED                                                                                                                                                                                                                                                                                                  |
|------------------------|---------------------------------------------|--------------------------------------------------------------------------------------------------------------------------------------------------------------------------------------------------------------------------------------------------------------------------------------------------------------------|
| MP:0003044             | impaired basement membrane formation        |                                                                                                                                                                                                                                                                                                                    |
| <b>ENSG00000163520</b> | <b>FBLN2 PPI subnetwork</b>                 | <i>ADAMTS15, CD248, COL4A3, NID2</i>                                                                                                                                                                                                                                                                               |
| MP:0004272             | abnormal basement membrane morphology       |                                                                                                                                                                                                                                                                                                                    |
| GO:0043256             | laminin complex                             |                                                                                                                                                                                                                                                                                                                    |
| ENSG00000130702        | LAMA5 PPI subnetwork                        |                                                                                                                                                                                                                                                                                                                    |
| ENSG00000132561        | MATN2 PPI subnetwork                        |                                                                                                                                                                                                                                                                                                                    |
| ENSG00000091136        | LAMB1 PPI subnetwork                        |                                                                                                                                                                                                                                                                                                                    |
| ENSG00000116962        | NID1 PPI subnetwork                         |                                                                                                                                                                                                                                                                                                                    |
| ENSG00000135862        | LAMC1 PPI subnetwork                        |                                                                                                                                                                                                                                                                                                                    |
| ENSG00000168487        | BMP1 PPI subnetwork                         |                                                                                                                                                                                                                                                                                                                    |
| GO:0034446             | substrate adhesion-dependent cell spreading |                                                                                                                                                                                                                                                                                                                    |
| ENSG00000125810        | CD93 PPI subnetwork                         |                                                                                                                                                                                                                                                                                                                    |
| ENSG00000134871        | COL4A2 PPI subnetwork                       | <i>ABCC9, CCDC102B, COL18A1, CSPG4, CTHRC1, FN1, IGFBP3, LAMC1, LOXL1, OLFML2B, TGFBI</i>                                                                                                                                                                                                                          |
| ENSG00000188153        | COL4A5 PPI subnetwork                       | <i>ABCA9, ADAMTS5, AEBP1, ART3, BICC1, C3, C7, COL15A1, COL1A1, COL1A2, COL3A1, COL4A3, COL5A2, COL6A2, ENSG00000259134, ENSG00000259284, FBLN5, FBN1, FIBIN, FNDC1, FSTL1, GALNTL4, GRB14, IGFBP6, LAMA2, LAMB1, LINC00312, LOX, MMP2, NOV, OLFML1, POSTN, SCN7A, SERPING1, SLIT3, SPARC, THBS2, VGLL3, WDR72</i> |
| ENSG00000112773        | FAM46A PPI subnetwork                       |                                                                                                                                                                                                                                                                                                                    |
| ENSG00000100985        | MMP9 PPI subnetwork                         |                                                                                                                                                                                                                                                                                                                    |
| ENSG00000110492        | MDK PPI subnetwork                          |                                                                                                                                                                                                                                                                                                                    |
| ENSG00000101680        | LAMA1 PPI subnetwork                        |                                                                                                                                                                                                                                                                                                                    |
| GO:0043236             | laminin binding                             |                                                                                                                                                                                                                                                                                                                    |
| ENSG00000187498        | COL4A1 PPI subnetwork                       | <i>ACTA2, COL14A1, COL4A2, CTHRC1, ENPEP, LHFP, LOXL2, TGFBI</i>                                                                                                                                                                                                                                                   |
| GO:0005605             | basal lamina                                |                                                                                                                                                                                                                                                                                                                    |
| ENSG00000213949        | ITGA1 PPI subnetwork                        |                                                                                                                                                                                                                                                                                                                    |
| ENSG00000114270        | COL7A1 PPI subnetwork                       |                                                                                                                                                                                                                                                                                                                    |
| GO:0050840             | extracellular matrix binding                |                                                                                                                                                                                                                                                                                                                    |
| ENSG00000081052        | COL4A4 PPI subnetwork                       | <i>ABCC9, ACTA2, ADAMTS1, ADAMTS5, ASPN, C1R, C1S, C7, CCDC80, COL4A1, COL5A1, COL6A1, DCN, EFEMP1, FBLN1, FKBP7, IGFBP3, LGALS1, LOX, LUM, MGP, NID2, PID1, PXDN, SCN7A, SERPINF1, SPARCL1, VCAN</i>                                                                                                              |
| GO:0005604             | basement membrane                           | <i>APLNR, COL12A1, CTGF, HTRA1, ITGB4, ITGB6, MCAM, PRSS23</i>                                                                                                                                                                                                                                                     |

**ESM Table 7: Association results for the lead SNPs at the MAGMA/PASCAL genes.**

| Phenotype      | Gene(s)             | CHR:POS     | SNP        | EA | NEA | EAF   | OR (95% CI)        | P-value                | P <sub>HET</sub> |
|----------------|---------------------|-------------|------------|----|-----|-------|--------------------|------------------------|------------------|
| CKD extremes   | <i>COL20A1</i>      | 20:61964452 | rs6011746  | C  | G   | 0.923 | 0.69 (0.59 - 0.8)  | 1.90×10 <sup>-6</sup>  | 0.65             |
| ESRD vs. All   | <i>COL20A1</i>      | 20:61950071 | rs74397198 | A  | G   | 0.078 | 1.44 (1.24 - 1.69) | 3.58×10 <sup>-6</sup>  | 1                |
| ESRD vs. macro | <i>DCLK1</i>        | 13:36542599 | rs12428319 | T  | C   | 0.553 | 1.2 (1.1 - 1.31)   | 3.18×10 <sup>-5</sup>  | 0.78             |
| ESRD vs. macro | <i>EIF4E</i>        | 4:99796439  | rs7664964  | T  | C   | 0.606 | 0.81 (0.74 - 0.88) | 8.92×10 <sup>-7</sup>  | 0.88             |
| Severe DKD     | <i>GPR158</i>       | 10:25590161 | rs532538   | T  | C   | 0.731 | 0.88 (0.84 - 0.93) | 2.96×10 <sup>-6</sup>  | 0.0053*          |
| All vs. Ctrl   | <i>INIP/SNX30</i>   | 9:115429626 | rs786959   | A  | G   | 0.105 | 1.18 (1.11 - 1.27) | 9.91×10 <sup>-7</sup>  | 0.63             |
| Severe DKD     | <i>LSM14A</i>       | 19:34701331 | rs1260634  | T  | C   | 0.371 | 1.12 (1.07 - 1.17) | 5.22×10 <sup>-6</sup>  | 0.94             |
| Severe DKD     | <i>MFF</i>          | 2:228121101 | rs55703767 | T  | G   | 0.208 | 0.82 (0.77 - 0.87) | 3.60×10 <sup>-11</sup> | 0.11             |
| CKD            | <i>PTPRN/RESP18</i> | 2:220178435 | rs2090163  | T  | C   | 0.728 | 1.14 (1.08 - 1.21) | 1.01×10 <sup>-6</sup>  | 0.46             |

EA: Effect allele. NEA: Non-effect allele. EAF: Effect allele frequency. P<sub>HET</sub>: P-value for heterogeneity between the type 1 diabetes and type 2 diabetes studies.

\*Type 1 diabetes: N=18,589, p=0.002, OR [95% CI] = 1.10 [1.03 - 1.16]; Type 2 diabetes: N=3,461, p=7.41×10<sup>-6</sup>, OR [95% CI] = 1.34 [1.18 - 1.52]



**ESM Table 8: TWAS results with  $p < 1 \times 10^{-4}$ .** P-values  $< 4.1 \times 10^{-6}$  (in bold) are significant after correction for multiple testing.

| Tissue | Pheno      | gene               | gene_name         | TWAS association |                 |       | Prediction performance |          |          |             |                 |
|--------|------------|--------------------|-------------------|------------------|-----------------|-------|------------------------|----------|----------|-------------|-----------------|
|        |            |                    |                   | Effect           | p-value         | var_g | r2                     | p-value  | q-value  | n_snps_used | n_snps_in_model |
| tub    | Severe DKD | ENSG00000135334.8  | <i>AKIRIN2</i>    | 0.308            | <b>1.11E-06</b> | 0.092 | 0.05                   | 0.013    | 0.012    | 39          | 42              |
| tub    | Macro      | ENSG00000135334.8  | <i>AKIRIN2</i>    | 0.383            | <b>1.70E-06</b> | 0.092 | 0.05                   | 0.013    | 0.012    | 39          | 42              |
| glom   | Micro      | ENSG00000268208.1  | <i>AC008372.1</i> | -7.489           | 1.59E-05        | 0.000 | 0.03                   | 0.083    | 0.044    | 1           | 1               |
| glom   | Macro      | ENSG00000228696.4  | <i>ARL17B</i>     | -0.195           | 2.06E-05        | 0.331 | 0.51                   | 1.28E-19 | 1.77E-18 | 54          | 65              |
| glom   | Micro      | ENSG00000138028.10 | <i>CGREF1</i>     | -0.228           | 2.15E-05        | 0.131 | 0.14                   | 2.08E-05 | 3.07E-05 | 25          | 26              |
| glom   | CKD        | ENSG00000078804.8  | <i>TP53INP2</i>   | 0.499            | 2.73E-05        | 0.068 | 0.03                   | 0.080    | 0.042    | 34          | 38              |
| glom   | Macro      | ENSG00000227057.3  | <i>WDR46</i>      | -0.583           | 4.05E-05        | 0.024 | 0.03                   | 0.085    | 0.044    | 10          | 10              |
| tub    | Severe DKD | ENSG00000205269.4  | <i>TMEM170B</i>   | 0.192            | 4.62E-05        | 0.133 | 0.06                   | 0.007    | 0.007    | 90          | 95              |
| tub    | CKD        | ENSG00000188283.7  | <i>ZNF383</i>     | 0.327            | 4.72E-05        | 0.046 | 0.05                   | 0.012    | 0.011    | 15          | 16              |
| tub    | CKD        | ENSG00000075413.13 | <i>MARK3</i>      | -0.258           | 5.05E-05        | 0.085 | 0.05                   | 0.013    | 0.012    | 102         | 104             |
| tub    | Macro      | ENSG00000162836.7  | <i>ACP6</i>       | -0.146           | 6.44E-05        | 0.377 | 0.47                   | 4.19E-18 | 7.16E-17 | 30          | 31              |

Tissue: tub(ular) or glom(erular). TWAS association: Effect: association effect size for the gene. P-value: p-value for the TWAS association. var\_g: variance of the gene expression. Prediction performance r2, p-value and q-value: statistics for tissue model's correlation to gene's measured transcriptome; n\_snps\_used: number of SNPs from GWAS that were used in the analysis; n\_snps\_in\_model: number of SNPs in the model (i.e. in the transcriptomics data). Macro, macroalbuminuria vs normal AER; Micro, microalbuminuria vs normal AER.

**ESM Table 8b: TWAS results look-up for lead SNPs in kidney tubular and glomerular eQTL data (Qiu et al. 2018, [15]) and GWAS on eGFR in the general population (Wuttke et al. 2019, [39]).** Results with  $p < 0.05$  are shown.

| Tissue | Pheno | gene               | gene_name    | TWAS association |         |       | Prediction performance |         |         |             |                 |
|--------|-------|--------------------|--------------|------------------|---------|-------|------------------------|---------|---------|-------------|-----------------|
|        |       |                    |              | Effect           | p-value | var_g | r2                     | p-value | q-value | n_snps_used | n_snps_in_model |
| tub    | eGFR  | ENSG00000148158.12 | <i>SNX30</i> | 0.0011           | 0.046   | 0.18  | 0.10                   | 0.0003  | 0.00058 | 73          | 82              |

**ESM Table 9: eQTL and association data for SNPs that were selected by elastic net regression model in TWAS contributing to AKIRIN2 TWAS association.**

| SNP         | Chr | Pos      | eQTL |     | Weight | Association with Severe DKD |     |         |        |       |        |       | eQTL Weight for risk allele |
|-------------|-----|----------|------|-----|--------|-----------------------------|-----|---------|--------|-------|--------|-------|-----------------------------|
|             |     |          | REF  | ALT |        | EA                          | NEA | EA Freq | Effect | SE    | P      | N     |                             |
| rs58305152  | 6   | 88340568 | G    | A   | -0.001 | A                           | G   | 0.274   | -0.101 | 0.027 | 0.0002 | 22045 | 0.001                       |
| rs12529993  | 6   | 88283420 | A    | C   | -0.071 | A                           | C   | 0.725   | 0.099  | 0.027 | 0.0003 | 22048 | 0.071                       |
| rs9450740   | 6   | 88273971 | G    | A   | -0.082 | A                           | G   | 0.274   | -0.099 | 0.027 | 0.0003 | 22046 | 0.082                       |
| rs2245604   | 6   | 88498604 | G    | T   | -0.194 | T                           | G   | 0.853   | -0.141 | 0.041 | 0.0005 | 21592 | 0.194                       |
| rs10944332  | 6   | 88492526 | A    | G   | 0.055  | A                           | G   | 0.865   | -0.132 | 0.042 | 0.0015 | 21593 | 0.055                       |
| rs4706308   | 6   | 88825342 | G    | T   | -0.061 | T                           | G   | 0.653   | -0.095 | 0.033 | 0.0038 | 22107 | 0.061                       |
| rs4707394   | 6   | 88453883 | G    | A   | -0.047 | A                           | G   | 0.536   | -0.059 | 0.024 | 0.014  | 22103 | 0.047                       |
| rs9342120   | 6   | 88455481 | A    | G   | -0.046 | A                           | G   | 0.465   | 0.058  | 0.024 | 0.016  | 22107 | 0.046                       |
| rs9444543   | 6   | 88450687 | G    | A   | -0.046 | A                           | G   | 0.535   | -0.058 | 0.024 | 0.016  | 22103 | 0.046                       |
| rs9344715   | 6   | 88448510 | A    | G   | -0.044 | A                           | G   | 0.465   | 0.057  | 0.024 | 0.017  | 22105 | 0.044                       |
| rs72914432  | 6   | 87758995 | C    | T   | 0.135  | T                           | C   | 0.044   | 0.174  | 0.077 | 0.024  | 19226 | 0.135                       |
| rs118049447 | 6   | 87717596 | G    | A   | 0.066  | A                           | G   | 0.043   | 0.177  | 0.079 | 0.026  | 18934 | 0.066                       |
| rs7738899   | 6   | 88481411 | T    | G   | -0.002 | T                           | G   | 0.394   | 0.054  | 0.026 | 0.037  | 22101 | 0.002                       |
| rs13205684  | 6   | 88478101 | C    | T   | -0.017 | T                           | C   | 0.607   | -0.052 | 0.025 | 0.043  | 22101 | 0.017                       |
| rs56200744  | 6   | 87624007 | C    | A   | 0.003  | A                           | C   | 0.145   | 0.071  | 0.042 | 0.095  | 21939 | 0.003                       |
| rs2787889   | 6   | 88505746 | T    | C   | -0.028 | T                           | C   | 0.199   | 0.055  | 0.034 | 0.099  | 21944 | 0.028                       |
| rs4707329   | 6   | 87572226 | G    | T   | -0.004 | T                           | G   | 0.107   | -0.067 | 0.041 | 0.099  | 21483 | 0.004                       |
| rs9450545   | 6   | 87583661 | T    | C   | -0.014 | T                           | C   | 0.887   | 0.066  | 0.040 | 0.103  | 21484 | 0.014                       |
| rs79344675  | 6   | 87586002 | A    | G   | -0.005 | A                           | G   | 0.891   | 0.063  | 0.041 | 0.121  | 21485 | 0.005                       |
| rs202220103 | 6   | 87610476 | T    | C   | -0.137 | T                           | C   | 0.904   | 0.073  | 0.049 | 0.139  | 16327 | 0.137                       |
| rs138083000 | 6   | 87587532 | T    | C   | -0.003 | T                           | C   | 0.891   | 0.059  | 0.041 | 0.145  | 21483 | 0.003                       |
| rs17731731  | 6   | 87928971 | G    | A   | 0.038  | A                           | G   | 0.084   | 0.076  | 0.053 | 0.153  | 21090 | 0.038                       |
| rs6927401   | 6   | 89043905 | A    | G   | 0.024  | A                           | G   | 0.573   | -0.026 | 0.024 | 0.297  | 22107 | 0.024                       |
| rs806377    | 6   | 88858723 | T    | C   | -0.031 | T                           | C   | 0.486   | -0.025 | 0.025 | 0.300  | 22102 | -0.031                      |
| rs9353542   | 6   | 89041259 | G    | T   | 0.024  | T                           | G   | 0.428   | 0.025  | 0.025 | 0.304  | 22103 | 0.024                       |
| rs12191012  | 6   | 89039844 | G    | A   | 0.039  | A                           | G   | 0.104   | 0.033  | 0.043 | 0.434  | 20900 | 0.039                       |
| rs1049353   | 6   | 88853635 | C    | T   | -0.013 | T                           | C   | 0.285   | -0.022 | 0.029 | 0.456  | 22048 | 0.013                       |
| rs9344742   | 6   | 88626153 | T    | C   | 0.054  | T                           | C   | 0.392   | 0.019  | 0.028 | 0.499  | 18646 | -0.054                      |
| rs34719676  | 6   | 87415764 | G    | A   | 0.012  | A                           | G   | 0.128   | 0.026  | 0.038 | 0.504  | 22046 | 0.012                       |
| rs7769951   | 6   | 89206945 | T    | C   | -0.025 | T                           | C   | 0.087   | 0.031  | 0.047 | 0.508  | 20384 | 0.025                       |
| rs62430887  | 6   | 89219617 | G    | A   | 0.016  | A                           | G   | 0.086   | 0.030  | 0.047 | 0.526  | 20385 | 0.016                       |
| rs36060042  | 6   | 87437974 | T    | C   | 0.050  | T                           | C   | 0.874   | -0.024 | 0.038 | 0.534  | 22046 | 0.050                       |
| rs4076053   | 6   | 88626861 | G    | A   | 0.032  | A                           | G   | 0.603   | -0.016 | 0.028 | 0.571  | 18646 | -0.032                      |
| rs28825134  | 6   | 89048365 | C    | A   | 0.038  | A                           | C   | 0.097   | 0.029  | 0.052 | 0.572  | 15743 | 0.038                       |
| rs199700576 | 6   | 89231738 | A    | G   | 0.020  | A                           | G   | 0.318   | -0.017 | 0.031 | 0.574  | 16889 | 0.020                       |
| rs73484048  | 6   | 88535200 | A    | G   | -0.008 | A                           | G   | 0.665   | 0.013  | 0.029 | 0.654  | 22044 | 0.008                       |
| rs78952394  | 6   | 88868594 | T    | C   | -0.015 | T                           | C   | 0.881   | 0.017  | 0.040 | 0.660  | 21545 | 0.015                       |
| rs7763877   | 6   | 88206513 | G    | A   | -0.019 | A                           | G   | 0.909   | -0.018 | 0.065 | 0.778  | 15930 | 0.019                       |
| rs3798787   | 6   | 89337530 | G    | A   | -0.130 | A                           | G   | 0.116   | -0.010 | 0.042 | 0.812  | 21090 | 0.130                       |
| rs7382639   | 6   | 89274654 | A    | G   | -0.033 | A                           | G   | 0.802   | 0.008  | 0.033 | 0.820  | 21938 | 0.033                       |
| rs9344742   | 6   | 88626153 | T    | C   | 0.054  | T                           | C   | 0.394   | 0.011  | 0.057 | 0.843  | 3457  | -0.054                      |
| rs12215366  | 6   | 88989076 | T    | G   | 0.096  | T                           | G   | 0.913   | -0.005 | 0.048 | 0.911  | 20900 | 0.096                       |
| rs4076053   | 6   | 88626861 | G    | A   | 0.032  | A                           | G   | 0.607   | -0.002 | 0.056 | 0.975  | 3456  | -0.032                      |

eQTL Weight: weights for AKIRIN2 gene (ENSG00000135334.8) from tubule eQTL dataset, for the Alt (alternative) allele. Association: EA: effect allele; NEA: non-effect allele. EA Freq: effect allele frequency. Effect: effect size beta for EA, such that positive effect indicates higher EA frequency in Severe DKD cases. SE: effect size standard error. P: SNP – Severe DKD association p-value. N: number of samples contributing to association. eQTL weight for risk allele: eQTL weight for the Severe DKD risk increasing allele (not necessarily the effect allele).

**ESM Table 10: Kidney eQTL associations with  $p < 1 \times 10^{-4}$  in tubular or glomerular eQTL data, or in the kidney eQTL meta-analysis for the lead SNPs.** Three top SNPs were queried for each lead locus from GWAS meta-analysis, gene-level (MAGMA or PASCAL) analysis, or TWAS locus. In addition, eQTL associations with  $p < 0.01$  in tubular or glomerular eQTL data, or in the kidney eQTL meta-analysis are given for the SNPs reaching genome-wide significance ( $p < 5 \times 10^{-8}$ ) in the GWAS meta-analysis.

| Tissue                                                                                                              | SNP        | CHR:POS     | P eQTL   | eQTL GENE        | Index gene     | P GWAS    | PP eQTL |
|---------------------------------------------------------------------------------------------------------------------|------------|-------------|----------|------------------|----------------|-----------|---------|
| Glomerular                                                                                                          | rs28577966 | 4:99796005  | 2.13E-07 | <i>ADH4</i>      | <i>EIF4E</i>   | 1.05E-06  | 0.698   |
| Glomerular                                                                                                          | rs7664964  | 4:99796439  | 2.13E-07 | <i>ADH4</i>      | <i>EIF4E</i>   | 8.92E-07  | 0.698   |
| Glomerular                                                                                                          | rs11725932 | 4:99799310  | 2.13E-07 | <i>ADH4</i>      | <i>EIF4E</i>   | 9.97E-07  | na      |
| Tubular                                                                                                             | rs59113552 | 6:88236233  | 5.19E-05 | <i>SMIM8</i>     | <i>AKIRIN2</i> | 2.85E-05  | na      |
| Kidney meta                                                                                                         | rs786959   | 9:115429626 | 4.59E-07 | <i>SNX30</i>     | <i>INIP</i>    | 9.913E-07 | 0.697   |
| Kidney meta                                                                                                         | rs6011746  | 20:61964452 | 5.75E-05 | <i>CHRNA4</i>    | <i>COL20A1</i> | 1.90E-06  | 0.00    |
| <b>eQTL associations with <math>p &lt; 0.01</math> for GWAS lead SNPs with <math>p &lt; 5 \times 10^{-8}</math></b> |            |             |          |                  |                |           |         |
| Glomerular                                                                                                          | rs55703767 | 2:228121101 | 0.0091   | <i>AC010735</i>  | <i>COL4A3</i>  | 3.60E-11  |         |
| Kidney meta                                                                                                         | rs72831309 | 5:166978230 | 0.0069   | <i>TENM2-AS1</i> | <i>TENM2</i>   | 9.82E-09  |         |

Tissue: kidney eQTL meta-analysis, or glomerular or tubule compartment-specific expression.

PP eQTL: posterior probability of colocalization for the GWAS and eQTL signal in a kidney meta-analysis of 686 samples.

**ESM Table 11: Significant kidney mQTL associations ( $p < 1.46 \times 10^{-11}$  Bonferroni-adjusted genome-wide significance;  $1 \times 10^{-7}$  suggestive significance) for lead loci.** Three most significant SNPs were queried at each associated loci from single variant, gene-level, and transcriptome-wide association study (TWAS).

| Chr | RSID        | SNP_Pos   | CpG        | CpG_Start | P mQTL   | PP mQTL | Gene           | P DKD/eGFR         |
|-----|-------------|-----------|------------|-----------|----------|---------|----------------|--------------------|
| 19  | rs668933    | 34704936  | cg14143166 | 34716204  | 1.94E-28 | 0.804   | <i>LSM14A</i>  | 0.03 (DKD)         |
| 19  | rs1260634   | 34701331  | cg14143166 | 34716204  | 2.09E-28 | 0.804   | <i>LSM14A</i>  | 0.03 (DKD)         |
| 19  | rs535440    | 34694581  | cg14143166 | 34716204  | 2.12E-28 | 0.804   | <i>LSM14A</i>  | 0.03 (DKD)         |
| 13  | rs12428319  | 36542599  | cg21746263 | 36562319  | 6.81E-22 | 0.821   | <i>DCLK1</i>   |                    |
| 13  | rs61948262  | 36533891  | cg21746263 | 36562319  | 4.19E-21 | 0.821   | <i>DCLK1</i>   |                    |
| 20  | rs117255010 | 61953366  | cg20706388 | 61958549  | 1.79E-12 | na      | <i>COL20A1</i> |                    |
| 20  | rs6011746   | 61964452  | cg20706388 | 61958549  | 2.14E-12 | 0.916   | <i>COL20A1</i> |                    |
| 20  | rs4809528   | 61943661  | cg20706388 | 61958549  | 2.55E-12 | 0.916   | <i>COL20A1</i> |                    |
| 20  | rs74397198  | 61950071  | cg20706388 | 61958549  | 2.88E-12 | 0.916   | <i>COL20A1</i> |                    |
| 20  | rs143391037 | 61971717  | cg20706388 | 61958549  | 4.76E-12 | na      | <i>COL20A1</i> |                    |
| 2   | rs6436131   | 220151858 | cg06895971 | 220147671 | 9.20E-12 | Na      | <i>PTPRN</i>   |                    |
| 4   | rs7664964   | 99796439  | cg25974308 | 99852386  | 1.10E-11 | 0.003   | <i>EIF4E</i>   | 0.041 (eGFR slope) |
| 4   | rs28577966  | 99796005  | cg25974308 | 99852386  | 1.10E-11 | 0.003   | <i>EIF4E</i>   | 0.041 (eGFR slope) |
| 4   | rs11725932  | 99799310  | cg25974308 | 99852386  | 1.10E-11 | 0.003   | <i>EIF4E</i>   | 0.041 (eGFR slope) |
| 6   | rs34472900  | 88405040  | cg00551398 | 88298473  | 1.12E-11 | na      | <i>AKIRIN2</i> |                    |
| 6   | rs151077971 | 88405605  | cg00551398 | 88298473  | 1.13E-11 | na      | <i>AKIRIN2</i> |                    |
| 6   | rs59113552  | 88236233  | cg00551398 | 88298473  | 1.58E-11 | na      | <i>AKIRIN2</i> |                    |
| 9   | rs786975    | 115451231 | cg13293976 | 115516494 | 2.20E-11 |         | <i>INIP</i>    | 0.012 (eGFR slope) |
| 2   | rs4674377   | 220201272 | cg14891200 | 220197663 | 2.72E-10 |         | <i>RESP18</i>  |                    |
| 2   | rs2090163   | 220178435 | cg14891200 | 220197663 | 1.06E-09 |         | <i>PTPRN</i>   |                    |
| 6   | rs59113552  | 88236233  | cg10313604 | 88493367  | 3.18E-09 |         | <i>AKIRIN2</i> |                    |
| 6   | rs151077971 | 88405605  | cg10313604 | 88493367  | 7.06E-09 |         | <i>AKIRIN2</i> |                    |
| 6   | rs34472900  | 88405040  | cg10313604 | 88493367  | 7.11E-09 |         | <i>AKIRIN2</i> |                    |
| 6   | rs151077971 | 88405605  | cg05834092 | 87792915  | 7.82E-09 |         | <i>AKIRIN2</i> |                    |
| 6   | rs34472900  | 88405040  | cg05834092 | 87792915  | 7.83E-09 |         | <i>AKIRIN2</i> |                    |
| 19  | rs535440    | 34694581  | cg21245903 | 34711622  | 9.97E-09 |         | <i>LSM14A</i>  |                    |
| 19  | rs1260634   | 34701331  | cg21245903 | 34711622  | 1.00E-08 |         | <i>LSM14A</i>  |                    |
| 19  | rs668933    | 34704936  | cg21245903 | 34711622  | 1.04E-08 |         | <i>LSM14A</i>  |                    |
| 6   | rs59113552  | 88236233  | cg05834092 | 87792915  | 1.63E-08 |         | <i>AKIRIN2</i> |                    |
| 6   | rs151077971 | 88405605  | cg15059496 | 88185750  | 3.76E-08 |         | <i>AKIRIN2</i> |                    |
| 6   | rs34472900  | 88405040  | cg15059496 | 88185750  | 3.76E-08 |         | <i>AKIRIN2</i> |                    |
| 6   | rs59113552  | 88236233  | cg20648632 | 88182160  | 4.22E-08 |         | <i>AKIRIN2</i> |                    |
| 2   | rs2090163   | 220178435 | cg19020434 | 220199207 | 6.40E-08 |         | <i>PTPRN</i>   |                    |
| 2   | rs4674377   | 220201272 | cg06895971 | 220147671 | 6.77E-08 |         | <i>RESP18</i>  |                    |
| 6   | rs59113552  | 88236233  | cg15059496 | 88185750  | 7.55E-08 |         | <i>AKIRIN2</i> |                    |
| 2   | rs4674377   | 220201272 | cg19020434 | 220199207 | 7.84E-08 |         | <i>RESP18</i>  |                    |
| 19  | rs535440    | 34694581  | cg01663383 | 34676533  | 8.98E-08 |         | <i>LSM14A</i>  |                    |
| 19  | rs1260634   | 34701331  | cg01663383 | 34676533  | 9.01E-08 |         | <i>LSM14A</i>  |                    |
| 19  | rs668933    | 34704936  | cg01663383 | 34676533  | 9.24E-08 |         | <i>LSM14A</i>  |                    |

Gene: CpG site annotated gene. P DKD/eGFR: P-value for association between blood methylation at the CpG site and DKD (UK-ROI+FinDiane EWAS) or with eGFR slope (CRIC EWAS).

**ESM Table 12: Correlation between glomerular and tubular gene expression and glomerulosclerosis, fibrosis, and eGFR in nephrectomy samples.** All associations with  $p < 0.05$  are shown, significant associations ( $p < 2.2 \times 10^{-4}$ , corrected for 29 genes  $\times$  2 tissue compartments  $\times$  4 phenotypes) are in bold.

| Gene    | Tissue | eGFR  |                | Glomerulosclerosis |                | Fibrosis |                | Group comparison |                 |
|---------|--------|-------|----------------|--------------------|----------------|----------|----------------|------------------|-----------------|
|         |        | r     | p              | r                  | p              | r        | p              | Direction        | p               |
| ALLC    | glom   |       |                |                    |                |          |                |                  |                 |
| ALLC    | tub    | 0.26  | <b>6.9E-08</b> |                    |                | -0.50    | <b>2.0E-16</b> | lowest in DKD    | <b>8.3E-05</b>  |
| COLEC11 | glom   | 0.24  | <b>1.0E-05</b> | -0.27              | <b>1.8E-06</b> |          |                | lowest in DKD    | <b>1.8E-05</b>  |
| COLEC11 | tub    | 0.21  | <b>1.0E-05</b> |                    |                | -0.47    | <b>2.0E-16</b> | lowest in DKD    | 1.37E-03        |
| PLEKHA7 | glom   | 0.14  | 9.5E-03        |                    |                |          |                | lowest in DKD    | <b>4.3E-06</b>  |
| PLEKHA7 | tub    | 0.30  | <b>1.3E-10</b> |                    |                | -0.49    | <b>2.0E-16</b> | lowest in DKD    | <b>1.3E-05</b>  |
| SNX30   | glom   | 0.24  | <b>1.2E-05</b> | -0.22              | <b>8.0E-05</b> |          |                | lowest for DKD   | <b>5.5E-05</b>  |
| SNX30   | tub    | 0.35  | <b>5.8E-14</b> |                    |                | -0.56    | <b>2.0E-16</b> |                  | <b>1.2E-06</b>  |
| DCLK1   | glom   |       |                |                    |                |          |                |                  |                 |
| DCLK1   | tub    | -0.15 | 1.48E-03       |                    |                | 0.39     | <b>7.4E-16</b> | Highest in DKD   | <b>2.17E-04</b> |
| TENM2   | glom   | 0.13  | 0.02           | -0.18              | 1.7E-03        |          |                |                  |                 |
| TENM2   | tub    | 0.27  | <b>1.6E-08</b> |                    |                | -0.29    | <b>2.0E-09</b> | lowest in DKD    | 6.6E-04         |
| COL4A3  | glom   | 0.11  | 0.05           | -0.16              | 4.8E-03        |          |                |                  |                 |
| COL4A3  | tub    |       |                |                    |                | 0.29     | <b>3.2E-09</b> |                  |                 |
| ZNF3    | glom   |       |                | 0.12               | 0.04           |          |                |                  |                 |
| ZNF3    | tub    | -0.13 | 7.26E-03       |                    |                | 0.26     | <b>1.4E-07</b> |                  |                 |
| TAMM41  | glom   | -0.11 | 0.04           | 0.16               | 4.1E-03        |          |                |                  |                 |
| TAMM41  | tub    | -0.20 | <b>2.0E-05</b> |                    |                | 0.26     | <b>1.5E-07</b> | highest in DKD   | 5.6E-03         |
| AKIRIN2 | glom   |       |                |                    |                |          |                |                  |                 |
| AKIRIN2 | tub    |       |                |                    |                | 0.25     | <b>2.8E-07</b> |                  |                 |
| EIF4E   | glom   | -0.12 | 0.03           |                    |                |          |                | highest in DKD   | <b>2.4E-06</b>  |
| EIF4E   | tub    |       |                |                    |                | -0.18    | <b>1.9E-04</b> |                  |                 |
| LSM14A  | glom   |       |                |                    |                |          |                |                  |                 |
| LSM14A  | tub    | 0.22  | <b>2.9E-06</b> |                    |                | -0.13    | 0.01           |                  |                 |
| INIP    | glom   |       |                | -0.15              | 9.3E-03        |          |                |                  |                 |
| INIP    | tub    | 0.22  | <b>5.5E-06</b> |                    |                | -0.21    | <b>2.2E-05</b> |                  |                 |
| MFF     | glom   |       |                |                    |                |          |                |                  |                 |
| MFF     | tub    |       |                |                    |                | -0.21    | <b>2.1E-05</b> |                  |                 |
| MBLAC1  | glom   |       |                | -0.11              | 0.05           |          |                | lowest in DKD    | 2.8E-03         |
| MBLAC1  | tub    |       |                |                    |                | -0.17    | 5.2E-04        |                  |                 |
| STAC    | glom   |       |                | -0.17              | 3.0E-03        |          |                |                  |                 |
| STAC    | tub    |       |                |                    |                |          |                |                  |                 |

r: Pearson correlation coefficient between the phenotype and  $\log_2$ (Fragments per kilobases of transcript per 1 million mapped reads [FPKM]) of gene expression in glomeruli/tubules. p: p-value. Group comparison: ANOVA test for group comparison (Controls, chronic kidney disease [CKD], diabetic kidney disease [DKD], diabetes mellitus [DM] (without DKD), hypertension [HTN]) vs.  $\log_2$ (FPKM) gene expression.

**ESM Table 13: Gene centric summary of the lead genes**

| GENE           | Pheno          | Indication                   | PoPS | P min | P min | lead SNP PCHiC Max score | Glom/<br>Tub<br>eQTL | Nephrectomy Gene expression vs. phenotype correlations |                |                    |               |               |   |                  |   | NephroSeq DN vs. healthy   |    |                   |    | Pima BX1 correlations | Pima BX2 correlations |  |  |  |  |
|----------------|----------------|------------------------------|------|-------|-------|--------------------------|----------------------|--------------------------------------------------------|----------------|--------------------|---------------|---------------|---|------------------|---|----------------------------|----|-------------------|----|-----------------------|-----------------------|--|--|--|--|
|                |                |                              |      |       |       |                          |                      | eGFR                                                   |                | Glomerulosclerosis |               | fibrosis      |   | Group comparison |   | Woroniciecka DN vs healthy |    | Ju DN vs. healthy |    |                       |                       |  |  |  |  |
|                |                |                              |      |       |       |                          |                      | r                                                      | p              | r                  | p             | r             | p | direction        | p | P                          | FC | P                 | FC |                       |                       |  |  |  |  |
| <b>TENM2</b>   | CKD+DKD        | Underlying lead SNP          | Yes  |       |       | <b>8.61</b>              | glom                 | 0.1                                                    | 0.022          | -0.2               | 0.002         |               |   |                  |   |                            |    |                   |    |                       |                       |  |  |  |  |
|                |                |                              |      |       |       |                          | tub                  | 0.3                                                    | <b>1.6E-8</b>  |                    |               |               |   |                  |   |                            |    |                   |    |                       |                       |  |  |  |  |
| <b>DCLK1</b>   | ESRD vs. macro | Gene-based test              |      |       |       | <b>6.81E-22</b>          | glom                 |                                                        |                |                    |               |               |   |                  |   |                            |    |                   |    |                       |                       |  |  |  |  |
|                |                |                              |      |       |       |                          | tub                  | 0.035                                                  | -0.2           | 0.001              |               |               |   |                  |   |                            |    |                   |    |                       |                       |  |  |  |  |
| <b>COL4A3</b>  | DKD            | Missense variant             | Yes  |       |       | <b>8.89</b>              | glom                 | 0.1                                                    | 0.047          | -0.2               | 0.005         |               |   |                  |   |                            |    |                   |    |                       |                       |  |  |  |  |
|                |                |                              |      |       |       |                          | tub                  |                                                        |                |                    |               |               |   |                  |   |                            |    |                   |    |                       |                       |  |  |  |  |
| <b>COLEC11</b> | CKD            | Nearby                       |      |       |       | <b>9.67</b>              | glom                 | 0.2                                                    | <b>1.0E-5</b>  | -0.3               | <b>1.8E-6</b> |               |   |                  |   |                            |    |                   |    |                       |                       |  |  |  |  |
|                |                |                              |      |       |       |                          | tub                  | 0.2                                                    | <b>1.0E-5</b>  |                    |               |               |   |                  |   |                            |    |                   |    |                       |                       |  |  |  |  |
| <b>ALLC</b>    | CKD            | Underlying lead SNP          |      |       |       | <b>10.42</b>             | glom                 |                                                        |                |                    |               |               |   |                  |   |                            |    |                   |    |                       |                       |  |  |  |  |
|                |                |                              |      |       |       |                          | tub                  | 0.3                                                    | <b>6.9E-8</b>  |                    |               |               |   |                  |   |                            |    |                   |    |                       |                       |  |  |  |  |
| <b>PLEKHA7</b> | Micro          | Underlying lead SNP          | Yes  |       |       | <b>9.49</b>              | glom                 | 0.1                                                    | 9.5E-3         |                    |               |               |   |                  |   |                            |    |                   |    |                       |                       |  |  |  |  |
|                |                |                              |      |       |       |                          | tub                  | 0.3                                                    | <b>1.3E-10</b> |                    |               |               |   |                  |   |                            |    |                   |    |                       |                       |  |  |  |  |
| <b>SNX30</b>   | DKD            | Gene-based test; kidney eQTL |      |       |       | <b>4.6E-7</b>            | glom                 | 0.012                                                  | 0.2            | <b>1.2E-05</b>     | -0.2          | <b>8.0E-5</b> |   |                  |   |                            |    |                   |    |                       |                       |  |  |  |  |
|                |                |                              |      |       |       |                          | tub                  | 0.002                                                  | 0.4            | <b>5.8E-14</b>     |               |               |   |                  |   |                            |    |                   |    |                       |                       |  |  |  |  |
| <b>AKIRIN2</b> | Severe DKD     | TWAS                         |      | 0.017 |       | <b>1.12E-11</b>          | glom                 |                                                        |                |                    |               |               |   |                  |   |                            |    |                   |    |                       |                       |  |  |  |  |
|                |                |                              |      |       |       |                          | tub                  | 0.001                                                  |                |                    |               |               |   |                  |   |                            |    |                   |    |                       |                       |  |  |  |  |
| <b>EIF4E</b>   | ESRD vs. macro | Gene-based test              |      |       |       | <b>1.10E-11</b>          | glom                 | -0.1                                                   | 0.027          |                    |               |               |   |                  |   |                            |    |                   |    |                       |                       |  |  |  |  |
|                |                |                              |      |       |       |                          | tub                  |                                                        |                |                    |               |               |   |                  |   |                            |    |                   |    |                       |                       |  |  |  |  |
| <b>MFF</b>     | Severe DKD     | Gene-based test              |      | 0.032 |       | <b>10.19</b>             | glom                 | 0.007                                                  |                |                    |               |               |   |                  |   |                            |    |                   |    |                       |                       |  |  |  |  |
|                |                |                              |      |       |       |                          | tub                  | 0.017                                                  |                |                    |               |               |   |                  |   |                            |    |                   |    |                       |                       |  |  |  |  |
| <b>ZNF3</b>    | Micro          | Underlying tag SNP           |      |       |       |                          | glom                 |                                                        |                | 0.1                | 0.038         |               |   |                  |   |                            |    |                   |    |                       |                       |  |  |  |  |
|                |                |                              |      |       |       |                          | tub                  |                                                        | -0.1           | 0.007              |               |               |   |                  |   |                            |    |                   |    |                       |                       |  |  |  |  |
| <b>TAMM41</b>  | Micro          | Nearby                       |      |       |       | <b>10.65</b>             | glom                 |                                                        | -0.1           | 0.037              | 0.2           | 0.004         |   |                  |   |                            |    |                   |    |                       |                       |  |  |  |  |
|                |                |                              |      |       |       |                          | tub                  |                                                        | -0.2           | <b>2.0E-5</b>      |               |               |   |                  |   |                            |    |                   |    |                       |                       |  |  |  |  |
| <b>LSM14A</b>  | Severe DKD     | Gene-based test              |      |       |       | <b>1.9E-28</b>           | glom                 | 0.004                                                  |                |                    |               |               |   |                  |   |                            |    |                   |    |                       |                       |  |  |  |  |
|                |                |                              |      |       |       |                          | tub                  | 0.017                                                  | 0.2            | <b>2.9E-6</b>      |               |               |   |                  |   |                            |    |                   |    |                       |                       |  |  |  |  |
| <b>STAC</b>    | ESRD vs. All   | Underlying lead SNP          |      |       |       | <b>10.87</b>             | glom                 |                                                        |                |                    |               |               |   |                  |   |                            |    |                   |    |                       |                       |  |  |  |  |
|                |                |                              |      |       |       |                          | tub                  |                                                        |                | -0.2               | 0.003         |               |   |                  |   |                            |    |                   |    |                       |                       |  |  |  |  |

|                  |                |                         |               |                |             |               |           |               |           |           |           |           |           |               |                                                                                                           |
|------------------|----------------|-------------------------|---------------|----------------|-------------|---------------|-----------|---------------|-----------|-----------|-----------|-----------|-----------|---------------|-----------------------------------------------------------------------------------------------------------|
| <b>PTPRN</b>     | CKD            | Gene-based test         | 0.007         | <b>9.2E-12</b> | <b>glom</b> |               |           |               |           |           | 0.016     | 1.14      | 0.002     | -1.16         | FootProcW: r=0.29<br>p=0.018;                                                                             |
|                  |                |                         |               |                | <b>tub</b>  |               |           |               |           |           | 0.011     | -1.21     | 9.5E-4    | -1.11         | HbA1c: r=0.28 p=0.059;                                                                                    |
| <b>INIP</b>      | DKD            | Gene-based test         |               | <b>2.2E-11</b> | <b>glom</b> | 0.004         |           |               |           |           |           |           |           |               |                                                                                                           |
|                  |                |                         |               |                | <b>tub</b>  |               | 0.2       | <b>5.5E-6</b> | -0.1      | 0.009     |           |           |           |               |                                                                                                           |
| <b>CNTN6</b>     | ESRD           | PoPS                    | <b>Yes</b>    | 0.046          | <b>glom</b> |               |           |               |           |           |           |           |           |               |                                                                                                           |
|                  |                |                         |               |                | <b>tub</b>  |               |           |               |           |           |           |           |           |               |                                                                                                           |
| <b>MBLAC1</b>    | Micro          | Nearby                  |               |                | <b>glom</b> |               |           |               | -0.1      | 0.054     |           |           |           | lowest in DKD | 0.003                                                                                                     |
|                  |                |                         |               |                | <b>tub</b>  |               |           |               |           |           |           |           |           |               |                                                                                                           |
| <b>COL20A1</b>   | CKD extremes   | Gene-based test         |               | <b>1.8E-12</b> | <b>glom</b> |               |           |               |           |           |           |           |           |               | FootProcW: r=-0.68 p=0.01;                                                                                |
|                  |                |                         |               |                | <b>tub</b>  | 0.018         |           |               |           |           |           |           |           |               |                                                                                                           |
| <b>DCLK3</b>     | ESRD vs. All   | Nearby                  |               | <b>8.8</b>     | <b>glom</b> |               |           |               |           |           |           |           |           |               | GlomWidth: r=0.33 p=0.021;<br>MesVol: r=0.34 p=0.015;<br>GlomVol: r=0.42 p=0.0072;<br>SV: r=-0.28 p=0.05; |
|                  |                |                         |               |                | <b>tub</b>  |               |           |               |           |           |           |           |           |               |                                                                                                           |
| <b>MUC7</b>      | Severe DKD     | Nearby                  |               | <b>10.53</b>   | <b>glom</b> |               |           |               |           |           |           |           |           |               |                                                                                                           |
|                  |                |                         |               |                | <b>tub</b>  |               |           |               |           |           |           |           |           |               |                                                                                                           |
| <b>RESP18</b>    | CKD            | Gene-based test         |               | <b>2.7E-10</b> | <b>glom</b> |               |           |               |           |           |           |           |           |               |                                                                                                           |
|                  |                |                         |               |                | <b>tub</b>  |               |           |               |           |           |           |           |           |               |                                                                                                           |
| <b>AMTN</b>      | Severe DKD     | Nearby                  |               |                | <b>glom</b> |               |           |               |           |           |           |           |           |               |                                                                                                           |
|                  |                |                         |               |                | <b>tub</b>  |               |           |               |           |           |           |           |           |               |                                                                                                           |
| <b>GPR158</b>    | Severe DKD     | Gene-based test         |               |                | <b>glom</b> |               |           |               |           |           |           |           |           |               |                                                                                                           |
|                  |                |                         |               |                | <b>tub</b>  |               |           |               |           |           |           |           |           |               |                                                                                                           |
| <b>LINC01266</b> | ESRD           | Underlying lead SNP     |               |                | <b>glom</b> |               |           |               |           |           |           |           |           |               |                                                                                                           |
|                  |                |                         |               |                | <b>tub</b>  |               |           |               |           |           |           |           |           |               |                                                                                                           |
| <b>PRNCR1</b>    | ESRD vs. macro | Underlying lead SNP     |               |                | <b>glom</b> |               |           |               |           |           |           |           |           |               | FootProcW: r=0.62 p=0.023;                                                                                |
|                  |                |                         |               |                | <b>tub</b>  |               |           |               |           |           |           |           |           |               |                                                                                                           |
| <b>TENM2-AS1</b> | CKD+DKD        | lead SNP kidney eQTL    | 0.007         | <b>NA</b>      | <b>glom</b> |               | <b>NA</b> | <b>NA</b>     | <b>NA</b> | <b>NA</b> | <b>NA</b> | <b>NA</b> | <b>NA</b> | <b>NA</b>     |                                                                                                           |
|                  |                |                         |               |                | <b>tub</b>  |               | <b>NA</b> | <b>NA</b>     | <b>NA</b> | <b>NA</b> | <b>NA</b> | <b>NA</b> | <b>NA</b> | <b>NA</b>     |                                                                                                           |
| <b>ADH4</b>      | ESRD vs. macro | glom eQTL for EIF4E     | 0.008         | <b>NA</b>      | <b>glom</b> | <b>2.1E-7</b> | <b>NA</b> | <b>NA</b>     | <b>NA</b> | <b>NA</b> | <b>NA</b> | <b>NA</b> | <b>NA</b> | <b>NA</b>     |                                                                                                           |
|                  |                |                         |               |                | <b>tub</b>  | 0.002         | <b>NA</b> | <b>NA</b>     | <b>NA</b> | <b>NA</b> | <b>NA</b> | <b>NA</b> | <b>NA</b> | <b>NA</b>     | ACR: r=0.39 p=0.003;                                                                                      |
| <b>SMIM8</b>     | Severe DKD     | tub eQTL for AKIRIN2    | 1.1E-4        | <b>NA</b>      | <b>glom</b> |               | <b>NA</b> | <b>NA</b>     | <b>NA</b> | <b>NA</b> | <b>NA</b> | <b>NA</b> | <b>NA</b> | <b>NA</b>     |                                                                                                           |
|                  |                |                         |               |                | <b>tub</b>  | <b>5.2E-5</b> | <b>NA</b> | <b>NA</b>     | <b>NA</b> | <b>NA</b> | <b>NA</b> | <b>NA</b> | <b>NA</b> | <b>NA</b>     |                                                                                                           |
| <b>CHRNA4</b>    | CKD extremes   | kidney eQTL for COL20A1 | <b>5.8E-5</b> | <b>NA</b>      | <b>glom</b> | 0.009         | <b>NA</b> | <b>NA</b>     | <b>NA</b> | <b>NA</b> | <b>NA</b> | 0.030     | 1.17      |               | FootProcW: r=0.27<br>p=0.029;                                                                             |
|                  |                |                         |               |                | <b>tub</b>  | 0.007         | <b>NA</b> | <b>NA</b>     | <b>NA</b> | <b>NA</b> | <b>NA</b> |           |           |               | eGFR: r=0.31 p=0.024;                                                                                     |

Indication: why gene was listed as a lead gene. PoPS: was prioritized by PoPS? Kidney eQTL: minimum P-value for eQTL association between the lead SNPs and the gene in the kidney eQTL meta-analysis. Kidney mQTL: minimum P-value for kidney methylation, between the lead SNPs and the gene, as assigned in the mQTL annotation. Lead SNP PCHic: highest score for chromatin 3D conformation capture data at the chicp.org for the GWAS meta-analysis lead loci. Glom/Tub eQTL: minimum P-value for eQTL association between the lead SNPs and the gene in glomerular/ tubular eQTL data. Nephrectomy Gene expression vs. phenotype correlations: Pearson correlation (r) and p-value for correlation between glomerular/tubular gene expression and the phenotype. NephroSeq DN vs. healthy: Fold change (FC) and p-value for differential glomerular/tubular gene expression in DN vs. healthy in the Woroniecka and Ju CKD data sets. Pima BX1/BX2 correlations: Pearson correlation coefficient r and p-value for glomerular/tubular gene expression vs. morphological parameters at the first (BX1) or second (BX2) biopsy.

**ESM Table 14: Mendelian Randomization (MR) results for DKD (All vs Ctrl)**

| Exposure                       | method                    | nsnp | OR (95%CI)         | se   | p-val    | Q-pval | I <sup>2</sup> (%) |
|--------------------------------|---------------------------|------|--------------------|------|----------|--------|--------------------|
| <b>Body fat</b>                | Inverse variance weighted | 9    | 1.48 (0.73-2.98)   | 0.36 | 0.27     | 0.02   | 60.2               |
| <b>Body fat</b>                | Weighted median           | 9    | 1.26 (0.64-2.49)   | 0.35 | 0.50     | NA     | NA                 |
| <b>Body fat</b>                | MR Egger                  | 9    | 1.04 (0.01-98.21)  | 2.32 | 0.99     | 0.01   | 65.1               |
| <b>Body mass index</b>         | Inverse variance weighted | 78   | 1.86 (1.55-2.23)   | 0.09 | 2.56e-11 | 0.50   | 0.00               |
| <b>Body mass index</b>         | Weighted median           | 78   | 1.76 (1.31-2.36)   | 0.15 | 1.85e-04 | NA     | NA                 |
| <b>Body mass index</b>         | MR Egger                  | 78   | 1.98 (1.28-3.08)   | 0.22 | 3.18e-03 | 0.48   | 0.36               |
| <b>Obesity class 1</b>         | Inverse variance weighted | 17   | 1.28 (1.14-1.44)   | 0.06 | 1.90e-05 | 0.10   | 31.6               |
| <b>Obesity class 1</b>         | Weighted median           | 17   | 1.24 (1.08-1.42)   | 0.07 | 2.26e-03 | NA     | NA                 |
| <b>Obesity class 1</b>         | MR Egger                  | 17   | 1.21 (0.87-1.69)   | 0.17 | 0.28     | 0.08   | 35.2               |
| <b>Obesity class 2</b>         | Inverse variance weighted | 11   | 1.16 (1.05-1.28)   | 0.05 | 2.83e-03 | 0.10   | 37.2               |
| <b>Obesity class 2</b>         | Weighted median           | 11   | 1.13 (1.02-1.26)   | 0.05 | 0.02     | NA     | NA                 |
| <b>Obesity class 2</b>         | MR Egger                  | 11   | 1.21 (0.89-1.65)   | 0.16 | 0.25     | 0.07   | 42.9               |
| <b>Overweight</b>              | Inverse variance weighted | 14   | 1.47 (1.22-1.77)   | 0.09 | 4.51e-05 | 0.07   | 38.6               |
| <b>Overweight</b>              | Weighted median           | 14   | 1.31 (1.05-1.64)   | 0.11 | 0.02     | NA     | NA                 |
| <b>Overweight</b>              | MR Egger                  | 14   | 1.11 (0.59-2.08)   | 0.32 | 0.75     | 0.07   | 39.3               |
| <b>Hip circumference</b>       | Inverse variance weighted | 49   | 1.74 (1.34-2.25)   | 0.13 | 2.68e-05 | 0.07   | 24.5               |
| <b>Hip circumference</b>       | Weighted median           | 49   | 1.89 (1.33-2.67)   | 0.18 | 3.29e-04 | NA     | NA                 |
| <b>Hip circumference</b>       | MR Egger                  | 49   | 3.45 (1.35-8.77)   | 0.48 | 0.01     | 0.09   | 22.5               |
| <b>Waist circumference</b>     | Inverse variance weighted | 45   | 1.90 (1.49-2.42)   | 0.12 | 1.71e-07 | 0.28   | 10.0               |
| <b>Waist circumference</b>     | Weighted median           | 45   | 1.86 (1.29-2.67)   | 0.19 | 8.35e-04 | NA     | NA                 |
| <b>Waist circumference</b>     | MR Egger                  | 45   | 2.39 (1.27-4.52)   | 0.32 | 0.01     | 0.27   | 10.8               |
| <b>Waist-to-hip ratio</b>      | Inverse variance weighted | 30   | 1.34 (0.97-1.84)   | 0.16 | 0.08     | 0.43   | 2.5                |
| <b>Waist-to-hip ratio</b>      | Weighted median           | 30   | 1.15 (0.72-1.84)   | 0.24 | 0.55     | NA     | NA                 |
| <b>Waist-to-hip ratio</b>      | MR Egger                  | 30   | 1.61 (0.37-6.95)   | 0.75 | 0.53     | 0.38   | 5.7                |
| <b>Coronary artery disease</b> | Inverse variance weighted | 61   | 0.99 (0.91-1.08)   | 0.04 | 0.79     | 0.65   | 0.00               |
| <b>Coronary artery disease</b> | Weighted median           | 61   | 0.95 (0.83-1.09)   | 0.07 | 0.47     | NA     | NA                 |
| <b>Coronary artery disease</b> | MR Egger                  | 61   | 0.92 (0.77-1.09)   | 0.09 | 0.34     | 0.65   | 0.00               |
| <b>Type 2 diabetes</b>         | Inverse variance weighted | 25   | 1.14 (1.02-1.27)   | 0.05 | 0.02     | 0.06   | 32.5               |
| <b>Type 2 diabetes</b>         | Weighted median           | 25   | 1.11 (0.97-1.27)   | 0.07 | 0.14     | NA     | NA                 |
| <b>Type 2 diabetes</b>         | MR Egger                  | 25   | 1.20 (0.79-1.83)   | 0.22 | 0.40     | 0.046  | 35.1               |
| <b>HDL cholesterol</b>         | Inverse variance weighted | 84   | 0.91 (0.82-1.02)   | 0.06 | 0.11     | 0.73   | 0.00               |
| <b>HDL cholesterol</b>         | Weighted median           | 84   | 1.03 (0.87-1.21)   | 0.09 | 0.77     | NA     | NA                 |
| <b>HDL cholesterol</b>         | MR Egger                  | 84   | 1.16 (0.94-1.43)   | 0.11 | 0.17     | 0.87   | 0.00               |
| <b>Urate</b>                   | Inverse variance weighted | 25   | 1.07 (0.94-1.23)   | 0.07 | 0.31     | 0.11   | 26.8               |
| <b>Urate</b>                   | Weighted median           | 25   | 1.08 (0.90-1.31)   | 0.10 | 0.40     | NA     | NA                 |
| <b>Urate</b>                   | MR Egger                  | 25   | 0.90 (0.71-1.15)   | 0.12 | 0.41     | 0.17   | 21.3               |
| <b>Smoking status: Never</b>   | Inverse variance weighted | 77   | 0.54 (0.27-1.06)   | 0.35 | 0.07     | 0.10   | 17.7               |
| <b>Smoking status: Never</b>   | Weighted median           | 77   | 0.84 (0.31-2.24)   | 0.50 | 0.72     | NA     | NA                 |
| <b>Smoking status: Never</b>   | MR Egger                  | 77   | 1.69 (0.08- 35.31) | 1.55 | 0.74     | 0.09   | 18.2               |
| <b>Smoking status: Current</b> | Inverse variance weighted | 15   | 0.94 (0.10-8.84)   | 1.15 | 0.96     | 0.95   | 0                  |
| <b>Smoking status: Current</b> | Weighted median           | 15   | 0.24 (0.01-4.54)   | 1.50 | 0.34     | NA     | NA                 |
| <b>Smoking status: Current</b> | MR Egger                  | 15   | 4.11 (0.00-1.4e5)  | 5.34 | 0.80     | 0.93   | 0                  |



**ESM Table 15. Egger intercepts for Mendelian Randomization analyses on DKD (all vs. Ctrl phenotype).**

| <b>Exposure</b>            | <b>Egger intercept</b> | <b>Intercept SE</b> | <b>Intercept p-value</b> |
|----------------------------|------------------------|---------------------|--------------------------|
| <b>Body fat</b>            | 0.00094                | 0.051               | 0.99                     |
| <b>BMI</b>                 | -0.0020                | 0.0063              | 0.76                     |
| <b>Obesity class I</b>     | 0.0072                 | 0.019               | 0.71                     |
| <b>Obesity class II</b>    | -0.0083                | 0.027               | 0.77                     |
| <b>Overweight</b>          | 0.024                  | 0.026               | 0.37                     |
| <b>Waist circumference</b> | -0.0095                | 0.011               | 0.39                     |
| <b>Hip circumference</b>   | -0.0071                | 0.0093              | 0.45                     |
| <b>WHR</b>                 | 0.0057                 | 0.017               | 0.74                     |
| <b>CAD</b>                 | 0.0086                 | 0.0064              | 0.18                     |
| <b>Type 2 diabetes</b>     | 0.012                  | 0.012               | 0.31                     |
| <b>HDL cholesterol</b>     | -0.013                 | 0.0047              | 0.0085                   |
| <b>Urate</b>               | 0.014                  | 0.0090              | 0.12                     |
| <b>Ever smoking</b>        | -0.0084                | 0.013               | 0.51                     |
| <b>Current smoking</b>     | -0.0078                | 0.027               | 0.78                     |

**ESM Figure 1: Odds ratios required to detect association with  $\geq 80\%$  statistical power, in function of the variant minor allele frequency [MAF].** Power was calculated at MAFs of 0.1%, 1%, 5%, 10%, 20%, 30%, 40%, and 50%.

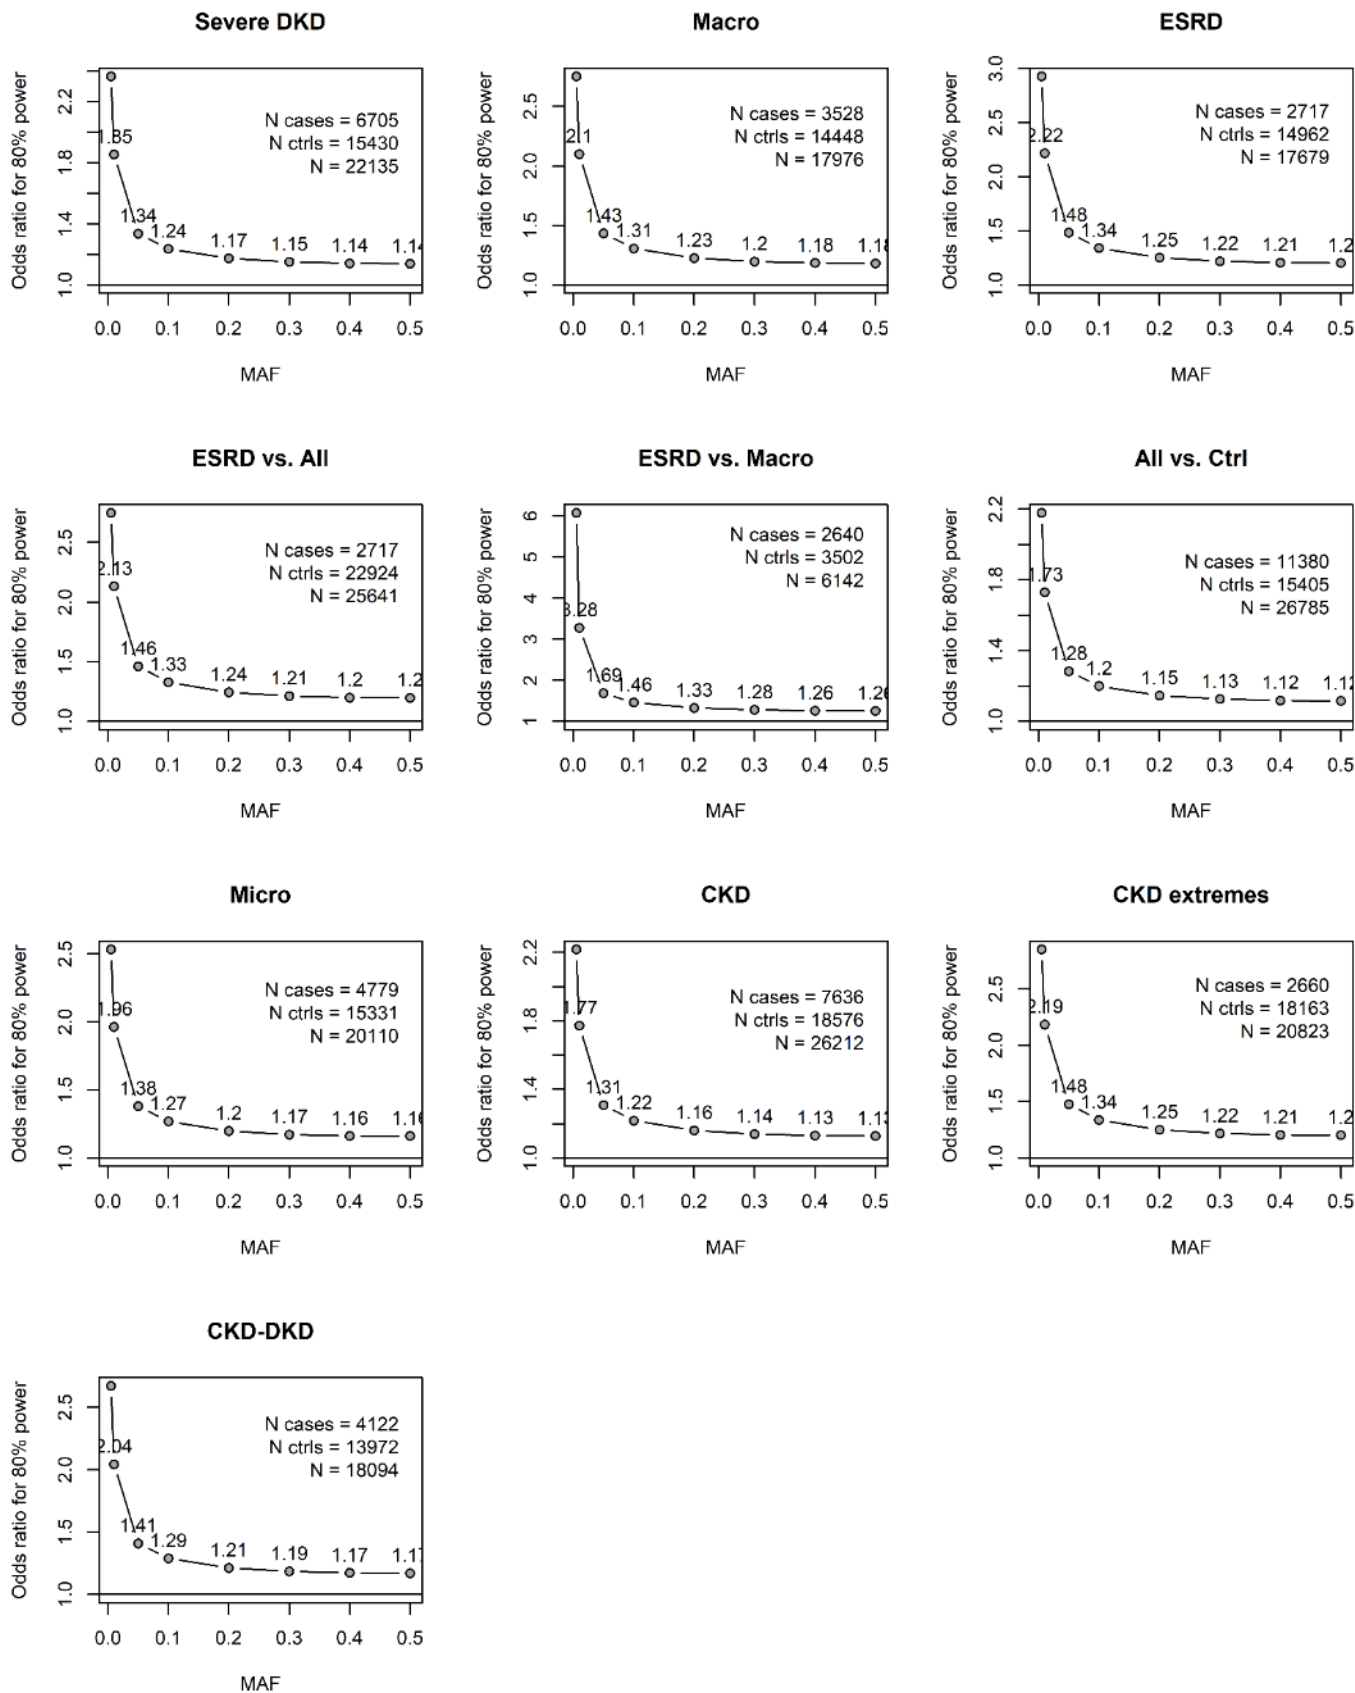

**ESM Figure 2: Manhattan and QQ-plots of the ten DKD GWAS meta-analysis results.**

**A: Severe DKD** (Macroalbuminuria or ESRD vs. normal AER).  $\lambda_{GC} = 1.029$ , LD score regression (LDSR) intercept = 1.019.

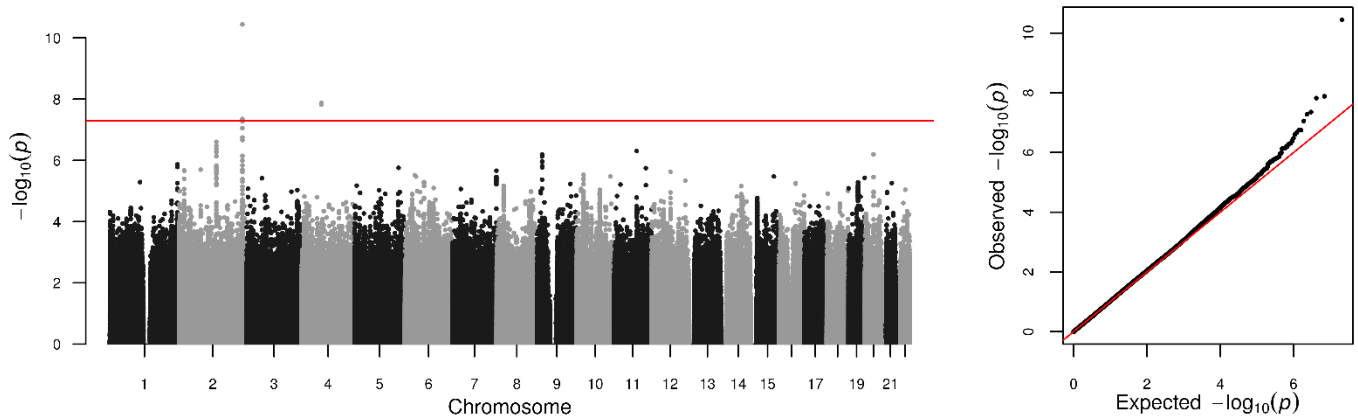

**B: Macro** (Macroalbuminuria vs. normal AER).  $\lambda_{GC} = 1.002$ , LDSR intercept = 1.028.

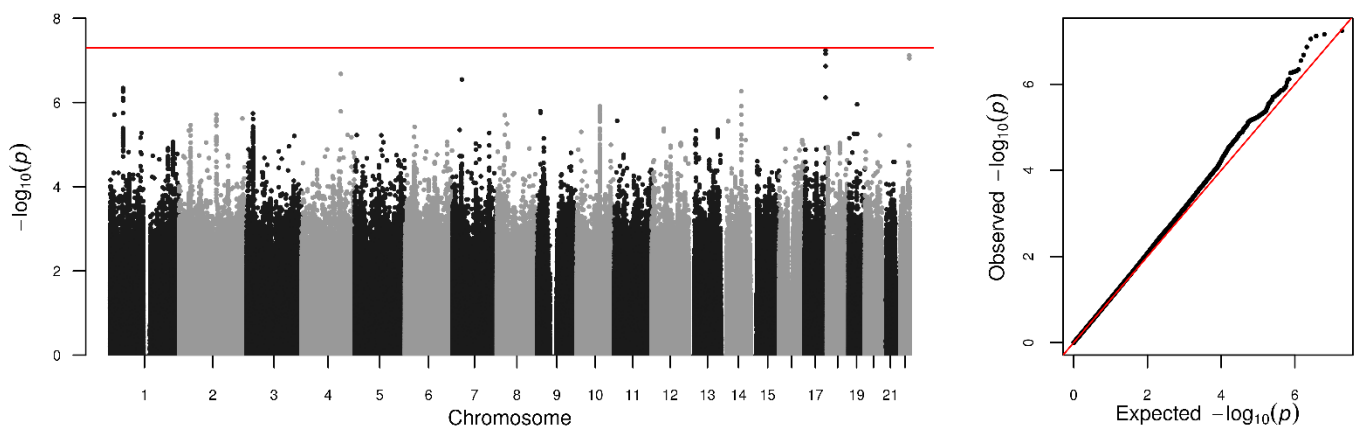

**C: ESRD** (ESRD vs. normal AER).  $\lambda_{GC} = 1.011$ , LDSR intercept = 1.018.

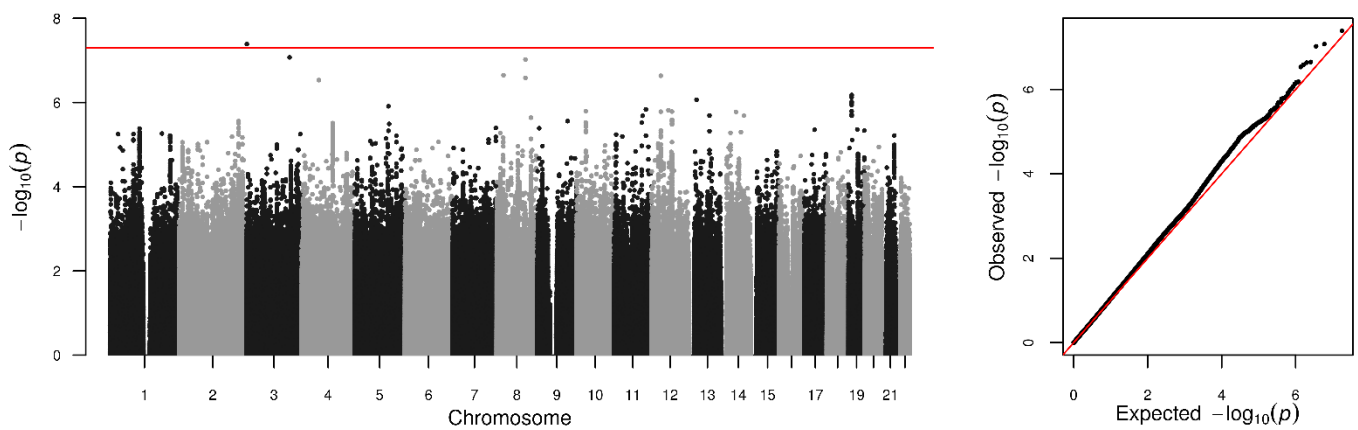

**D: ESRD vs. All** (ESRD vs. macro- or microalbuminuria or normal AER).  $\lambda_{GC} = 1.029$ , LDSR intercept = 1.054.

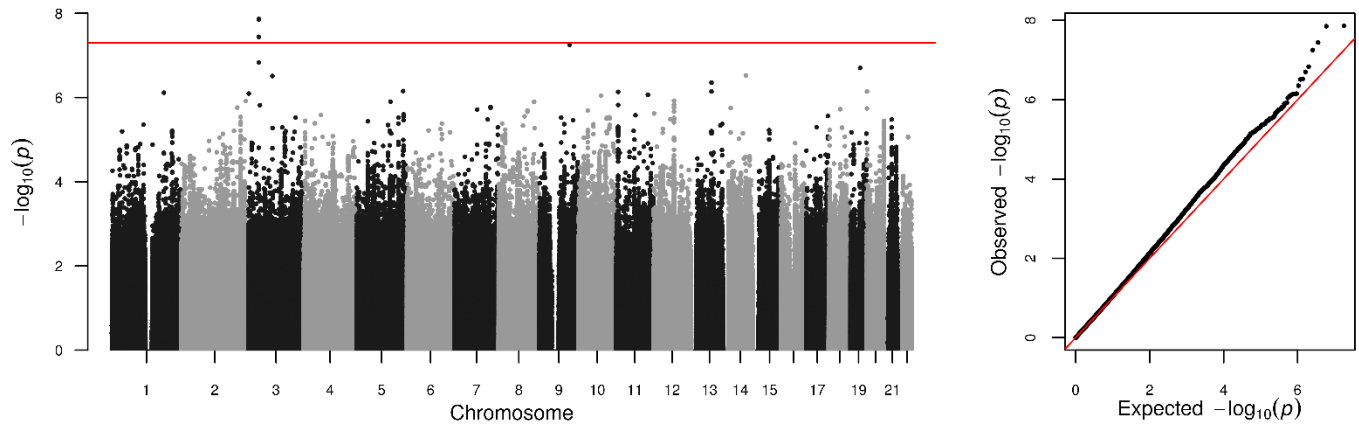

**E: ESRD vs. Macro** (ESRD vs. macroalbuminuria).  $\lambda_{GC} = 1.011$ , LDSR intercept = 1.009.

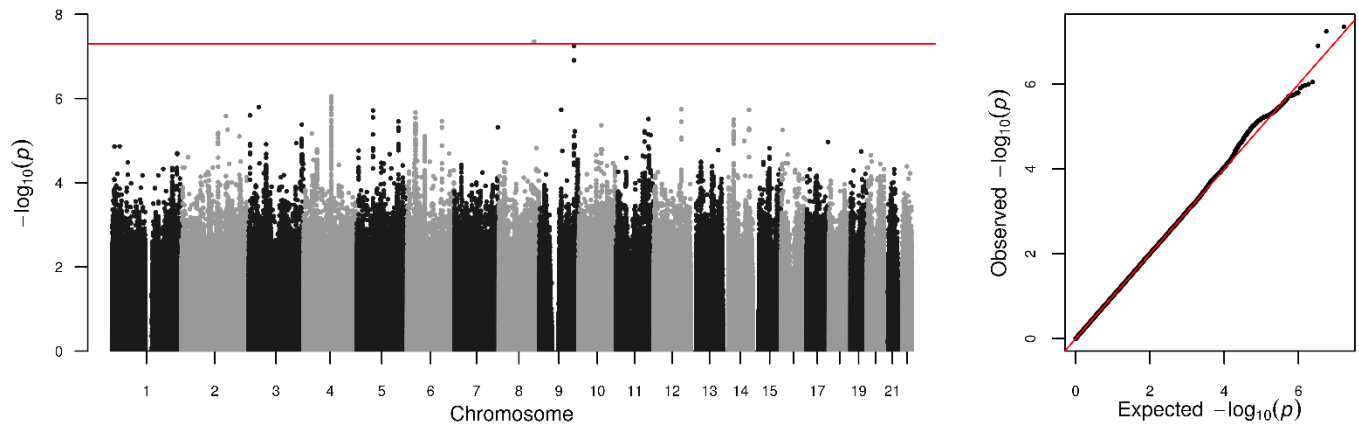

**F: All vs. Ctrl** (Micro- or Macroalbuminuria or ESRD vs. normal AER).  $\lambda_{GC} = 1.035$ , LDSR intercept = 1.005.

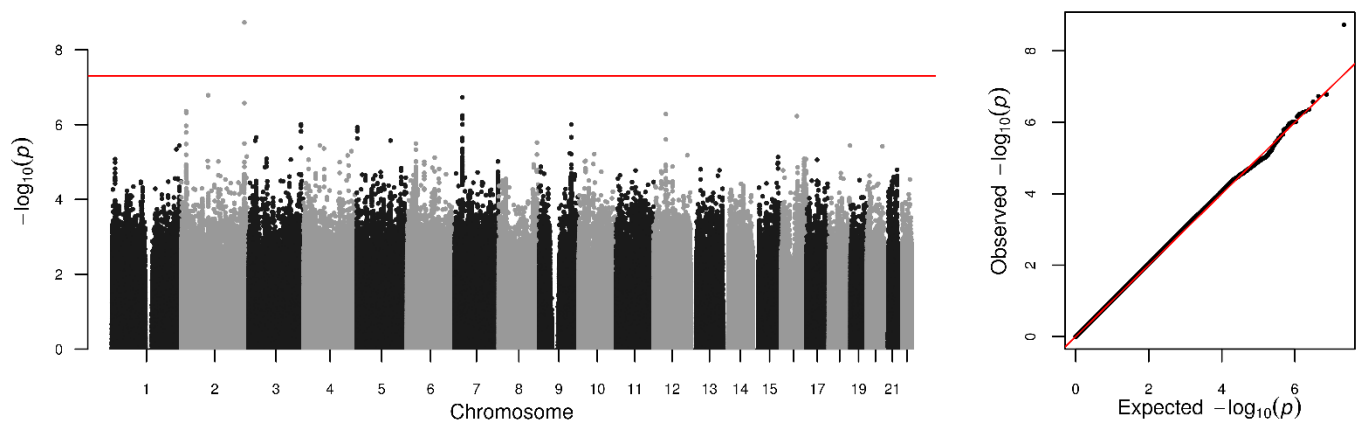

**G: Micro** (Microalbuminuria vs. normal AER).  $\lambda_{GC} = 1.008$ , LDSR intercept = 1.004.

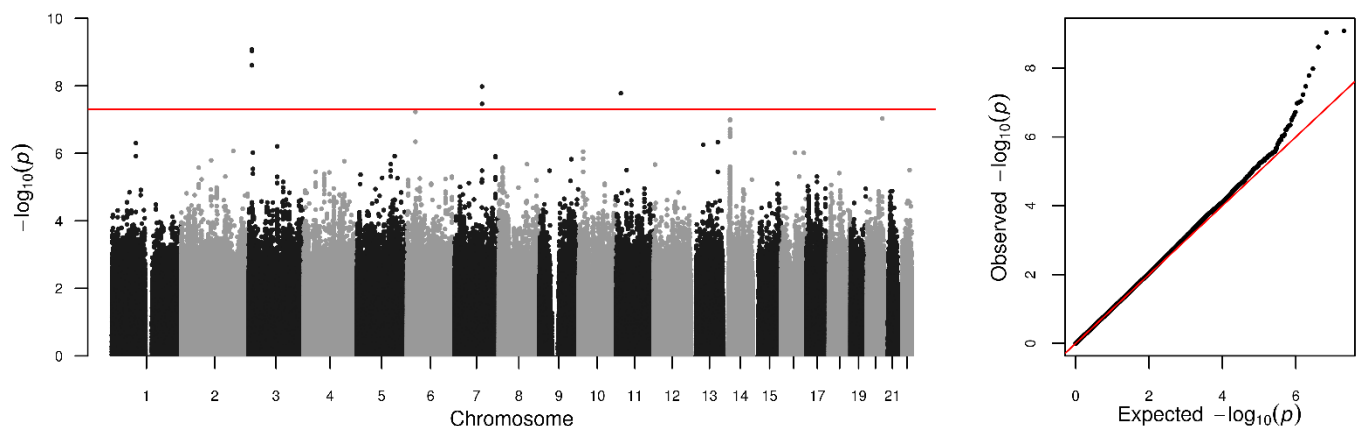

**H: CKD** (eGFR < 60 ml/min/1.73m<sup>2</sup> vs. eGFR ≥60 ml/min/1.73m<sup>2</sup>).  $\lambda_{GC} = 1.041$ , LDSR intercept = 1.028.

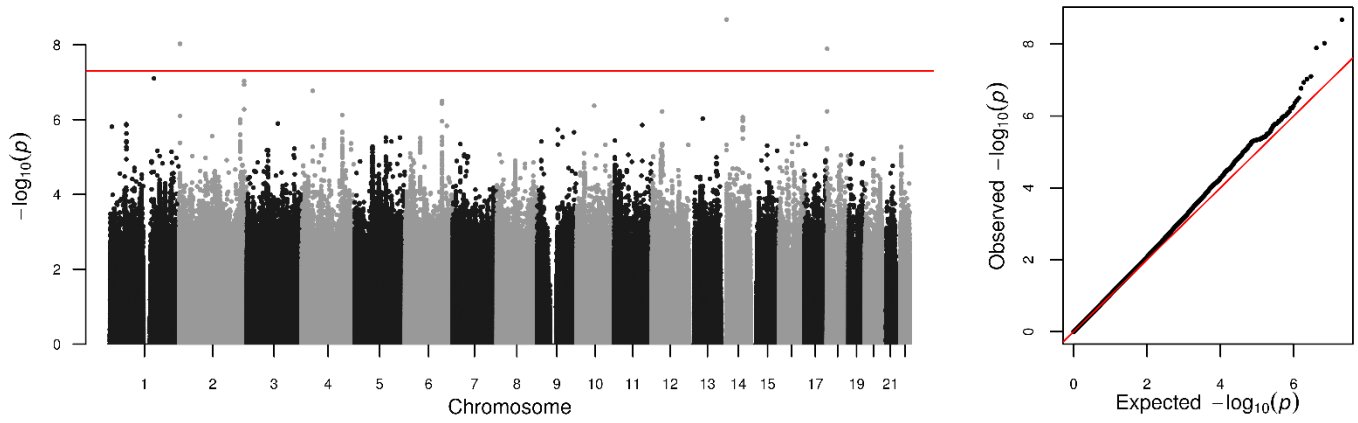

**I: CKD Extremes** (ESRD or eGFR < 15 ml/min/1.73m<sup>2</sup> vs. eGFR ≥ 60 ml/min/1.73m<sup>2</sup>).  $\lambda_{GC} = 1.023$ , LDSR intercept = 1.019.

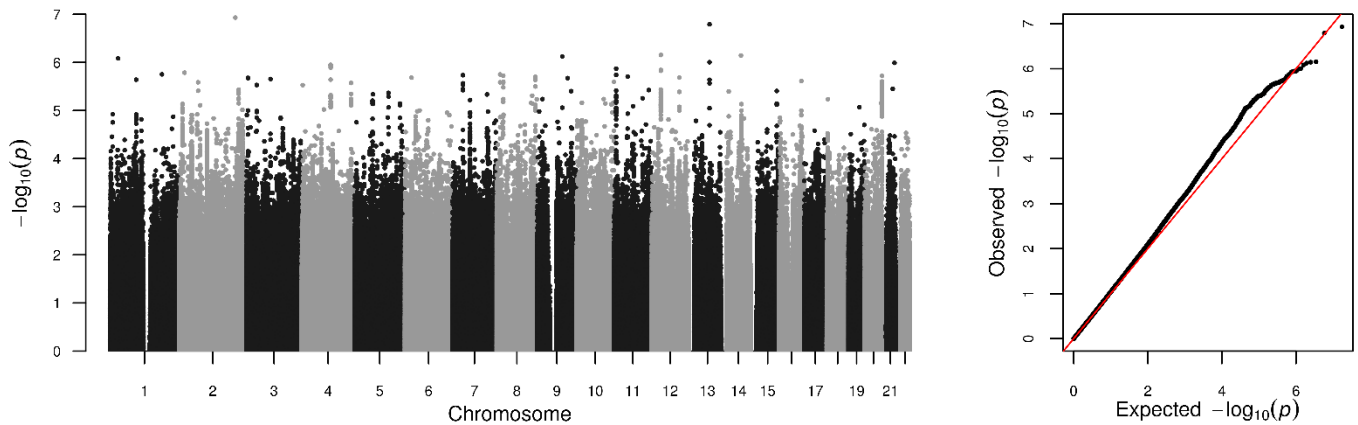

**J: CKD-DKD** (ESRD or eGFR < 45 ml/min/1.73m<sup>2</sup> and micro- or macroalbuminuria vs. eGFR ≥ 60ml/min/1.73m<sup>2</sup> and normal AER).  $\lambda_{GC} = 1.023$ , LDSR intercept = 1.031.

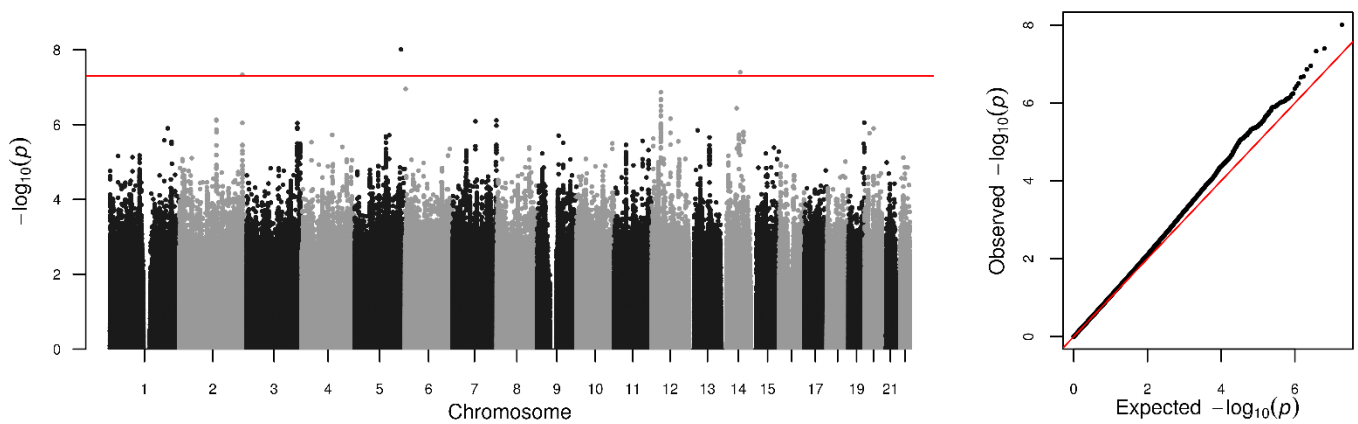

**ESM Figure 3: Regional association plot for the *COL4A3* gene region associated with Severe DKD, indicating a secondary association peak at chr2:228259302 (rs6436688, effect allele (A) frequency 56%, OR = 1.13 (95% confidence interval 1.08 – 1.19), p-value  $1.79 \times 10^{-7}$ ). SNP rs6436688 is in partial LD ( $D' = 0.51$ ,  $r^2 = 0.08$ , 1000Genomes European ancestry populations) with the original *COL4A3* lead variant rs55703767. Variants are colored according to their LD correlation with the primary signal (chr2:228121101 rs55703767) in red, or with the secondary peak in blue; stronger color indicates stronger correlation.**

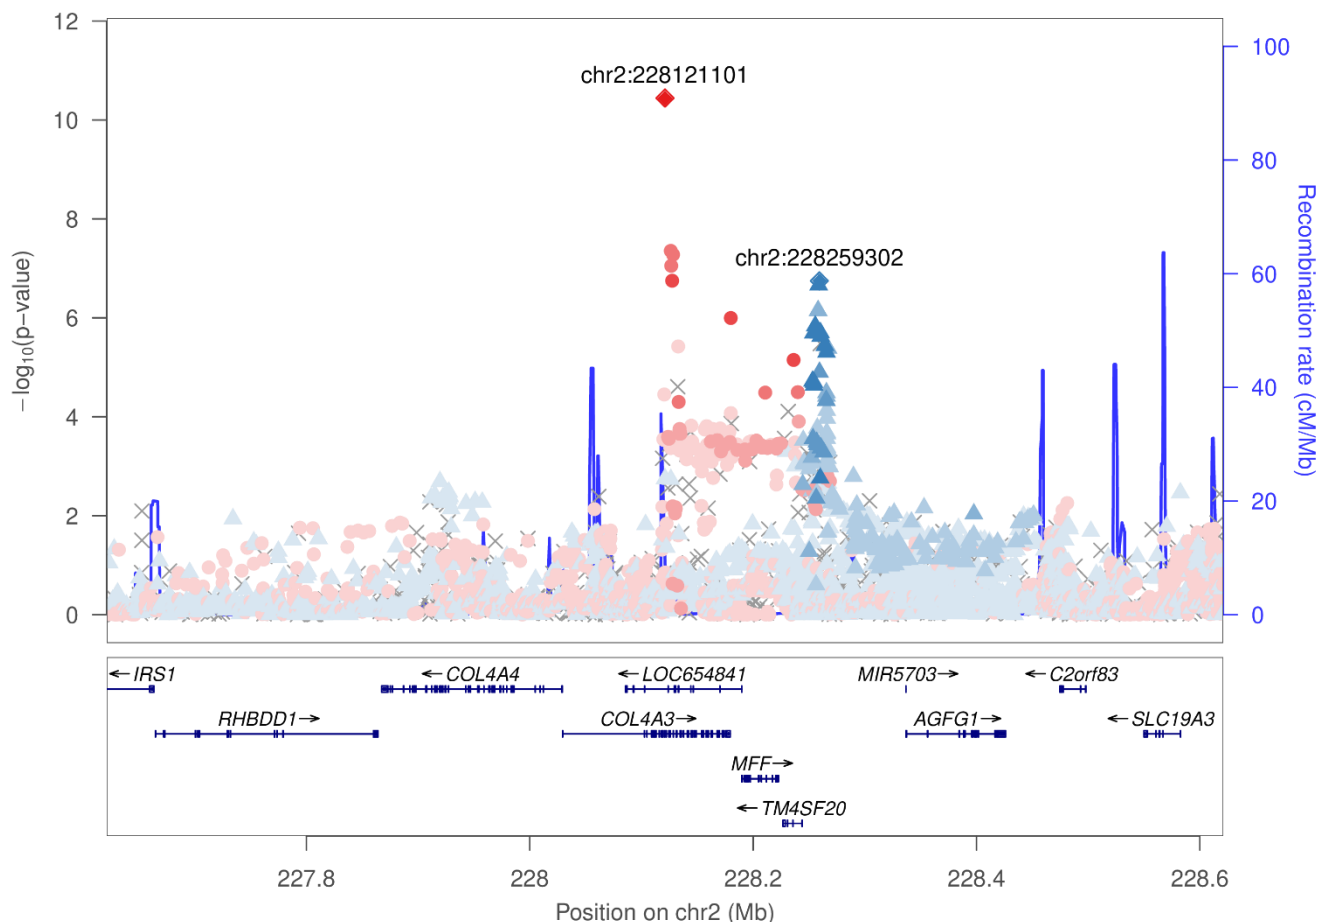

**ESM Figure 4: Regional association plots for the GWAS meta-analysis lead loci (A-K).**

**A: CKD+DKD chr5:166978230 (rs72831309)**

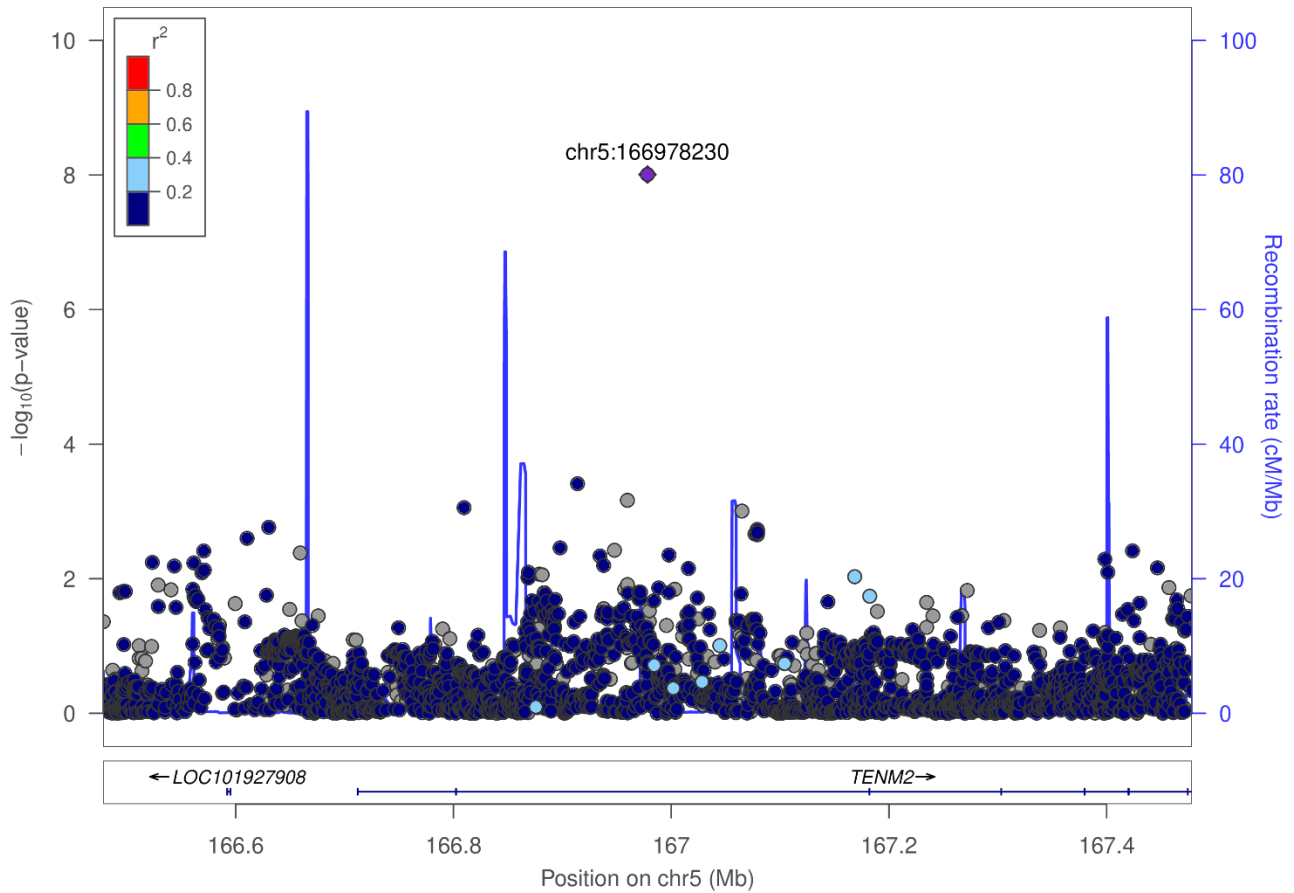

**B: CKD chr2:3745215 (rs12615970)**

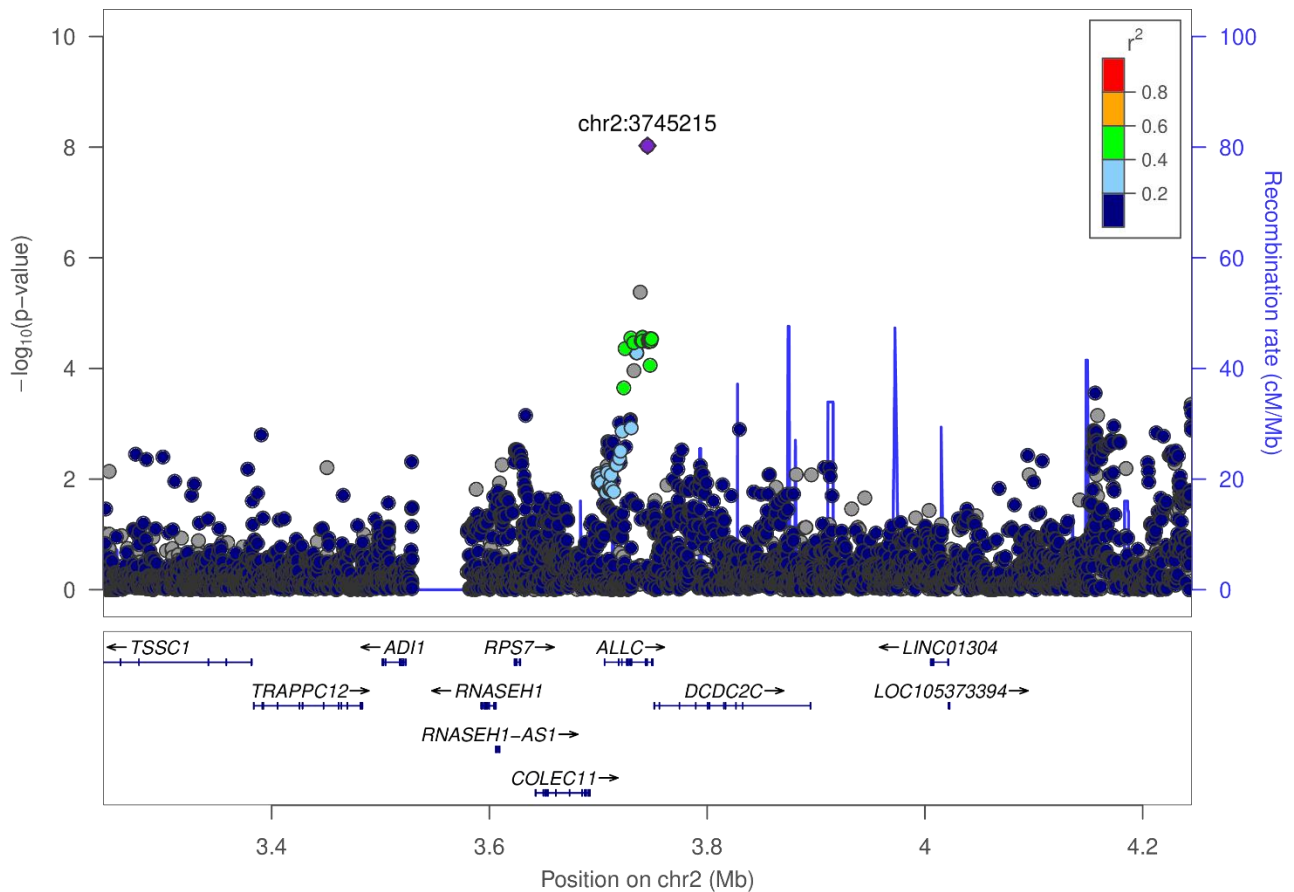

**C: Severe DKD chr2:228121101 (rs55703767)**

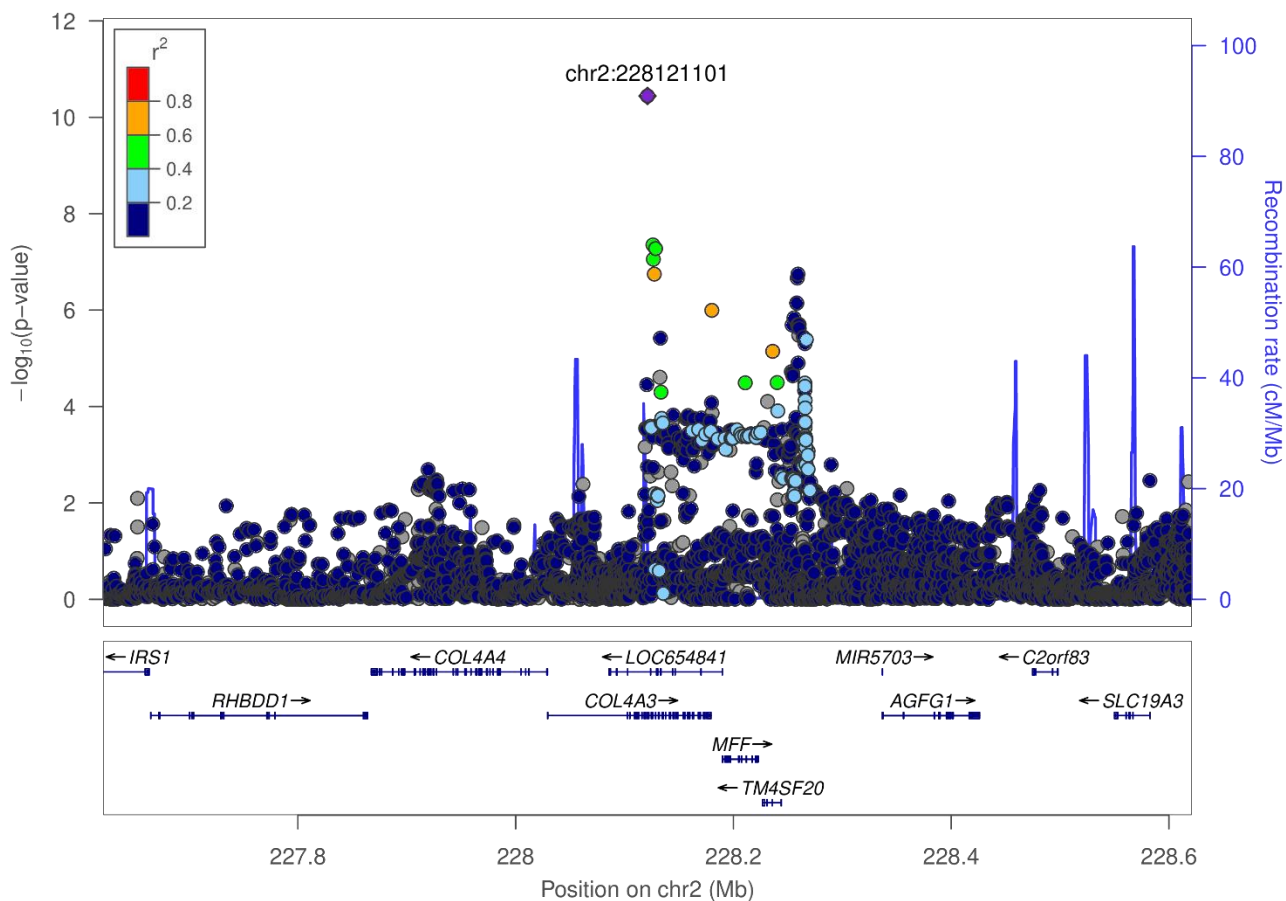

**D: ESRD chr3:926345 (rs115061173)**

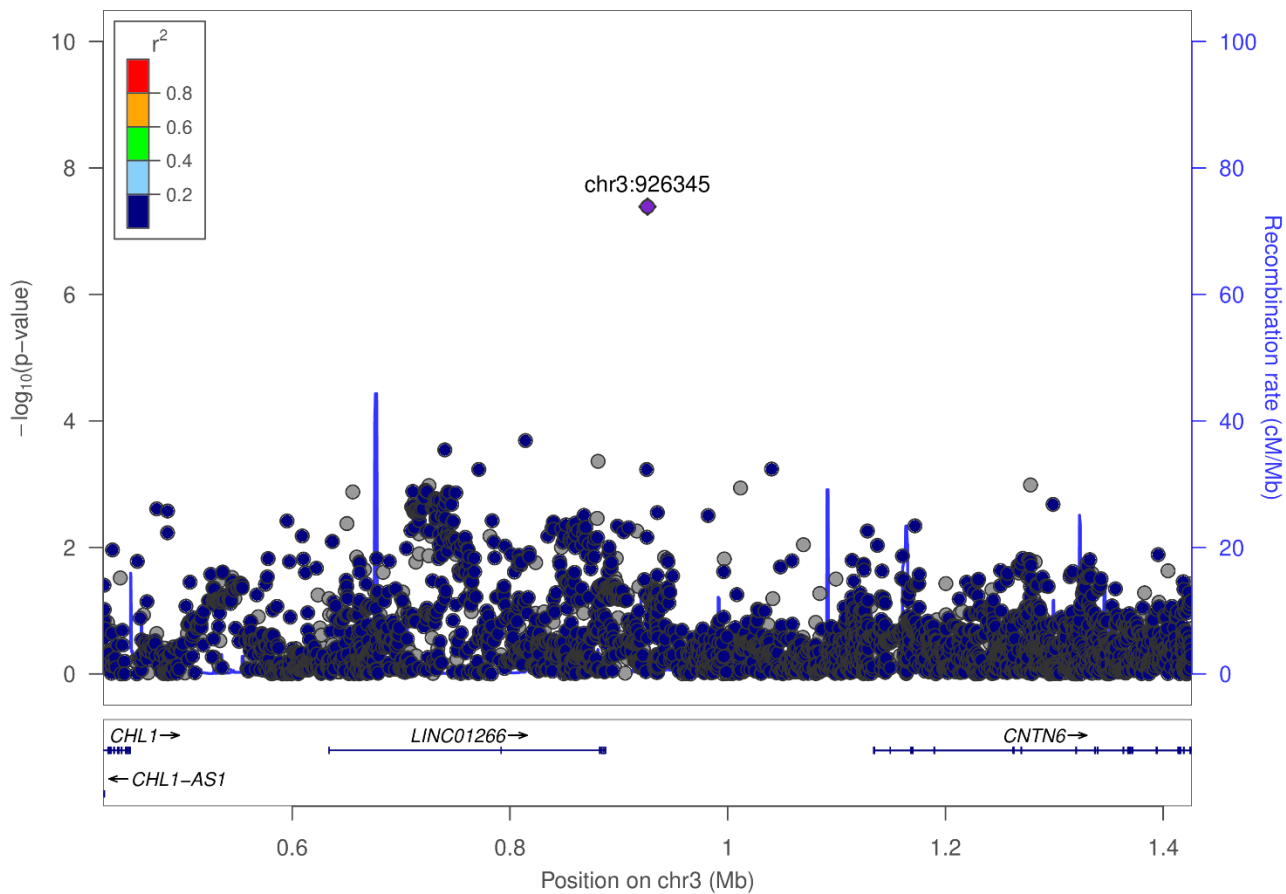



**E: Micro chr3:11910635 (rs142823282)**

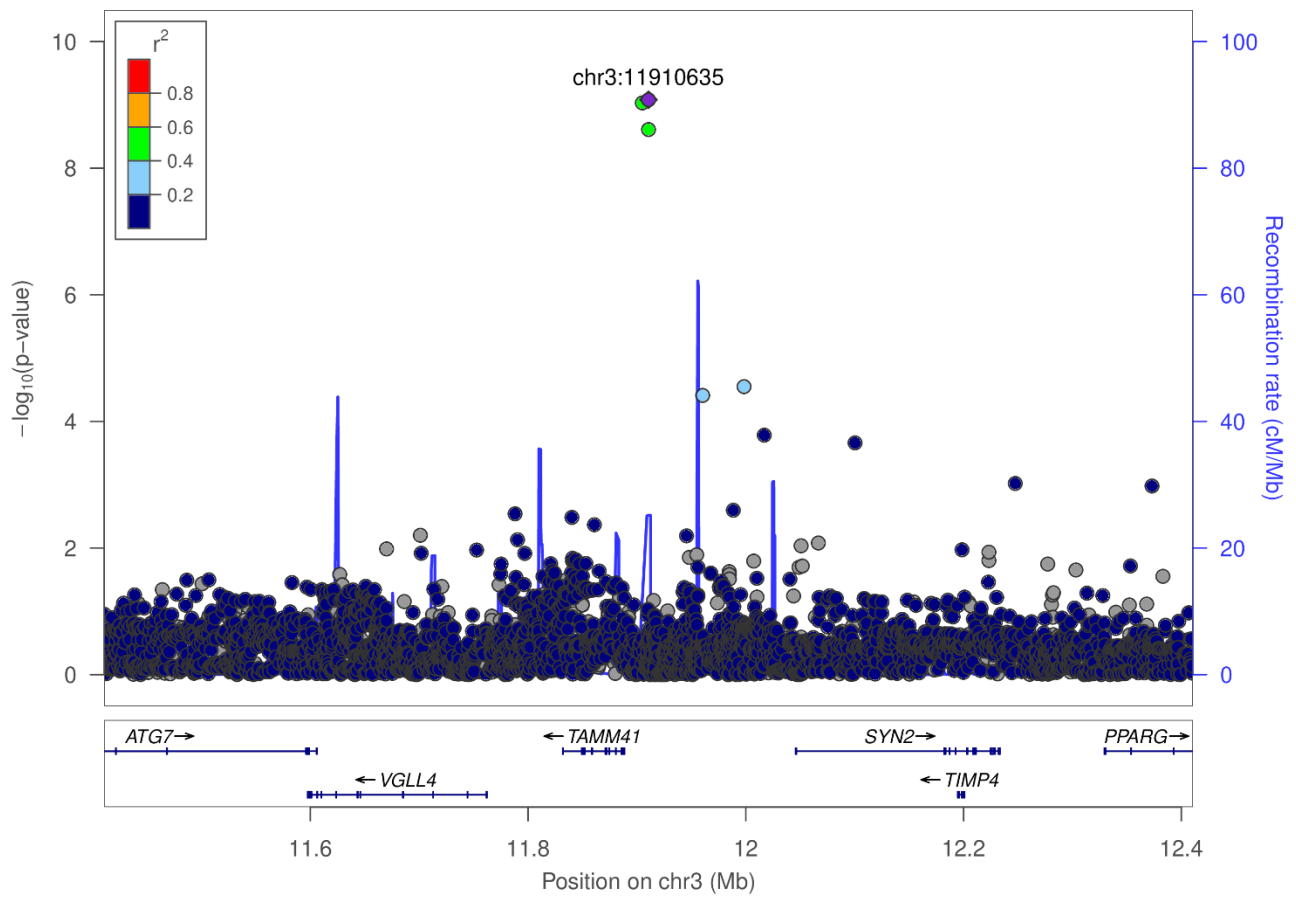

**F:** ESRD vs. All chr3:36566312 (rs116216059). The SNP rs116216059 is located on a single nucleus ATACseq (snATACseq) peak border in podocytes (PODO), peak value 1.1 (peak maximum value 7.0).

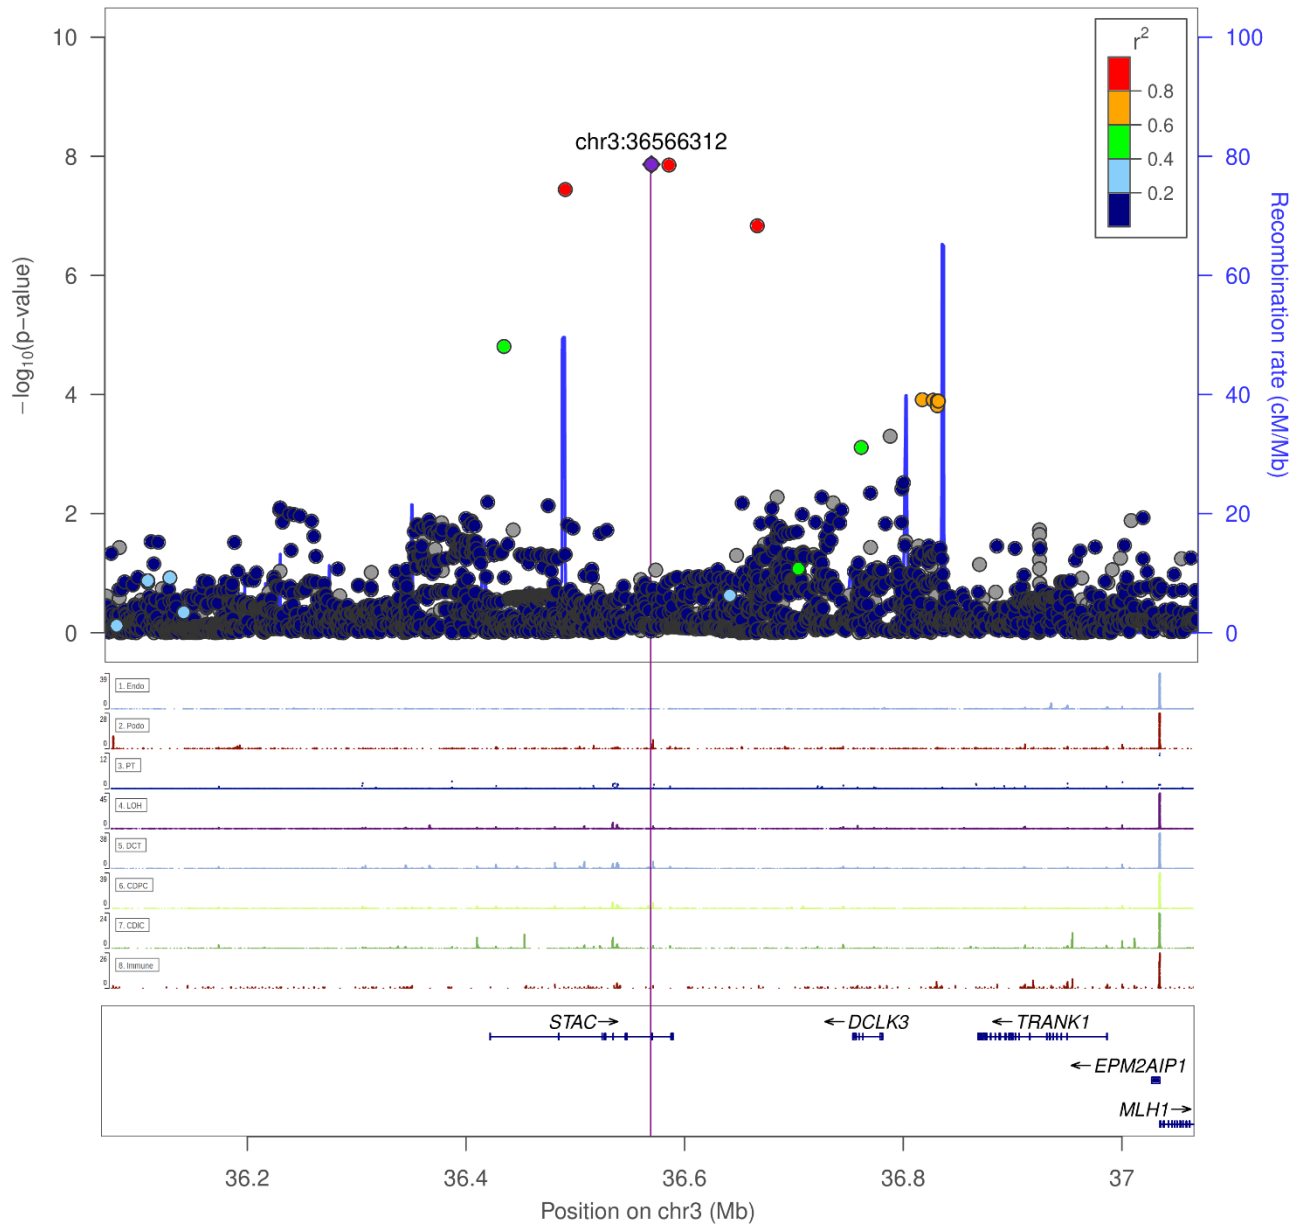

**G: Severe DKD chr4:71358776 (rs191449639)**

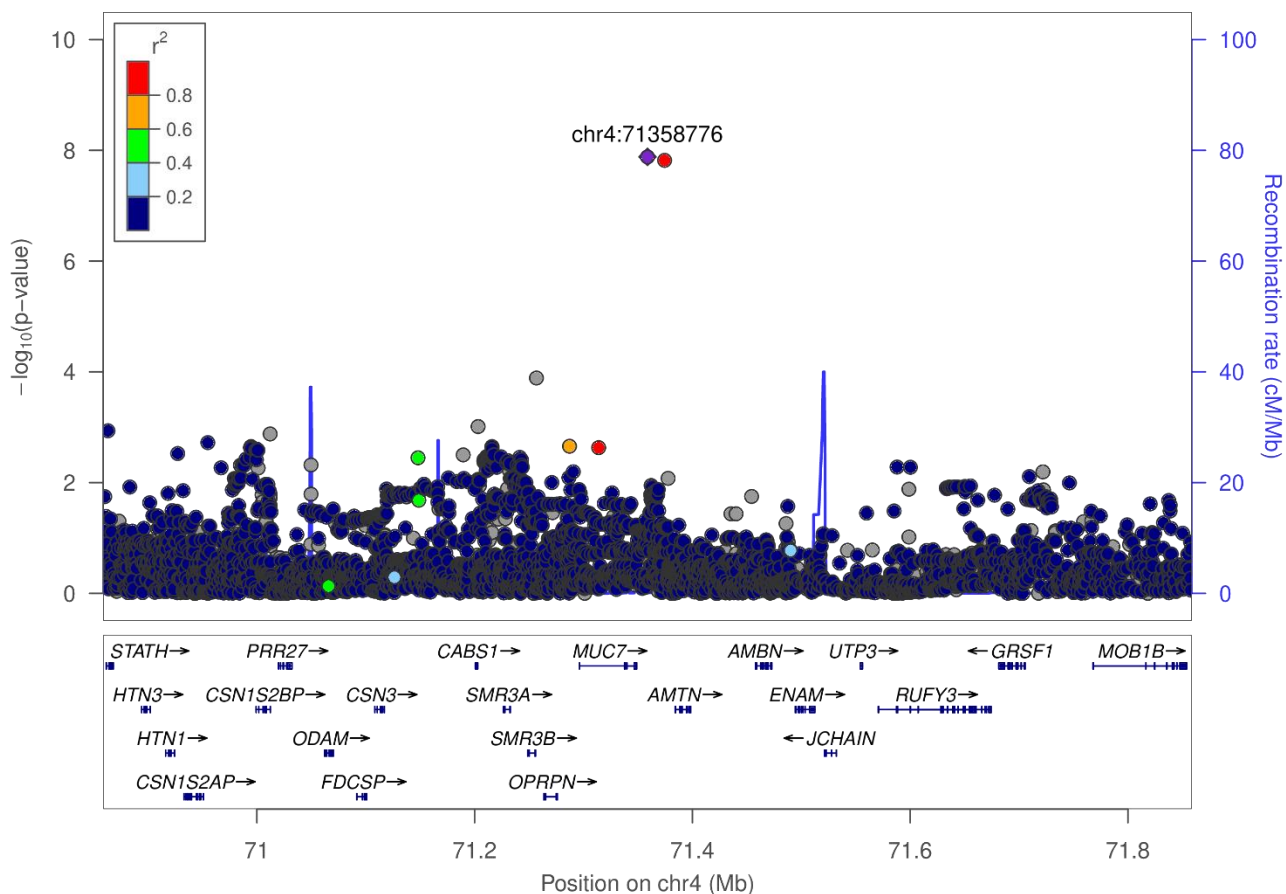

**H: Micro chr7:99728546 (rs77273076)**

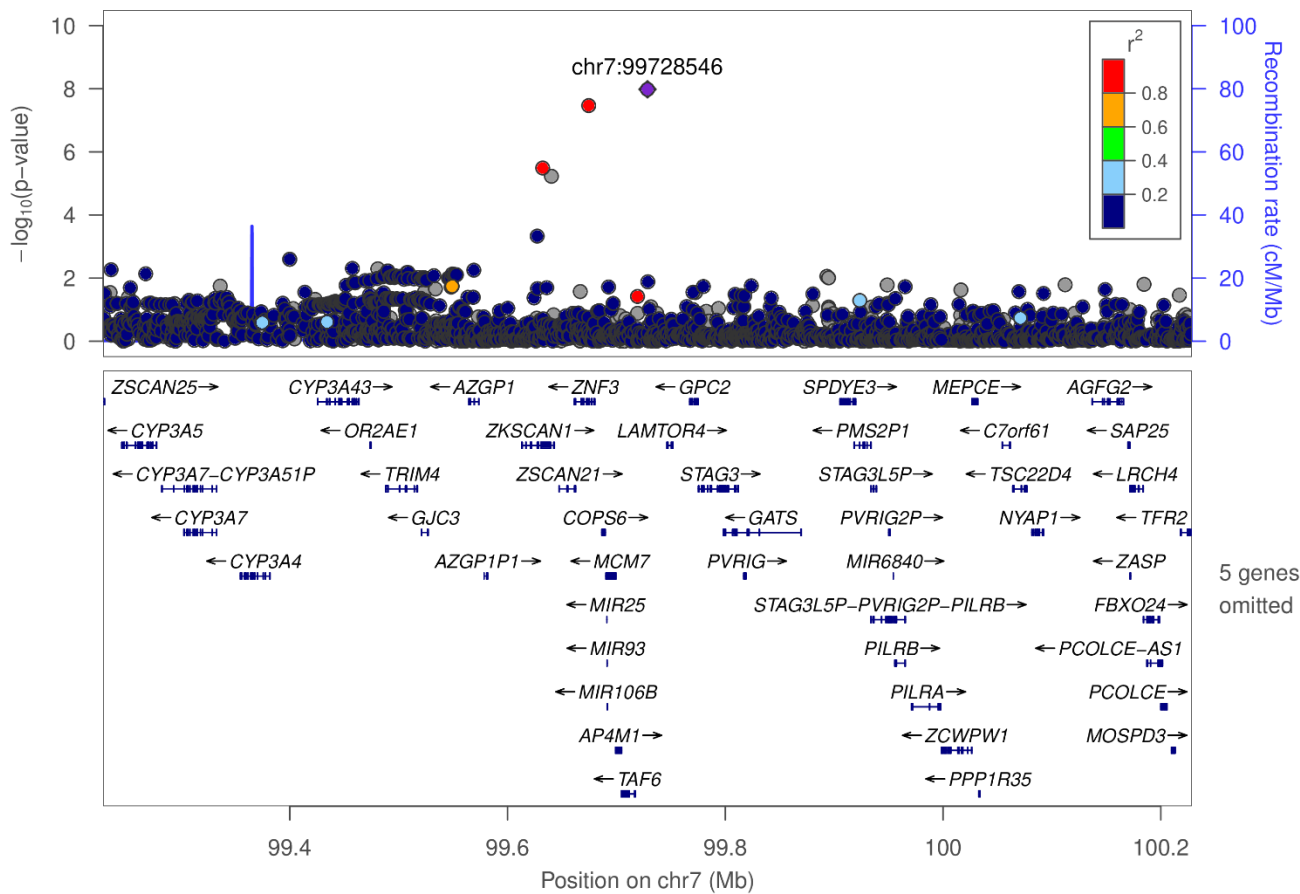

**I: ESRD vs. macro chr8:128100029 (rs551191707)**

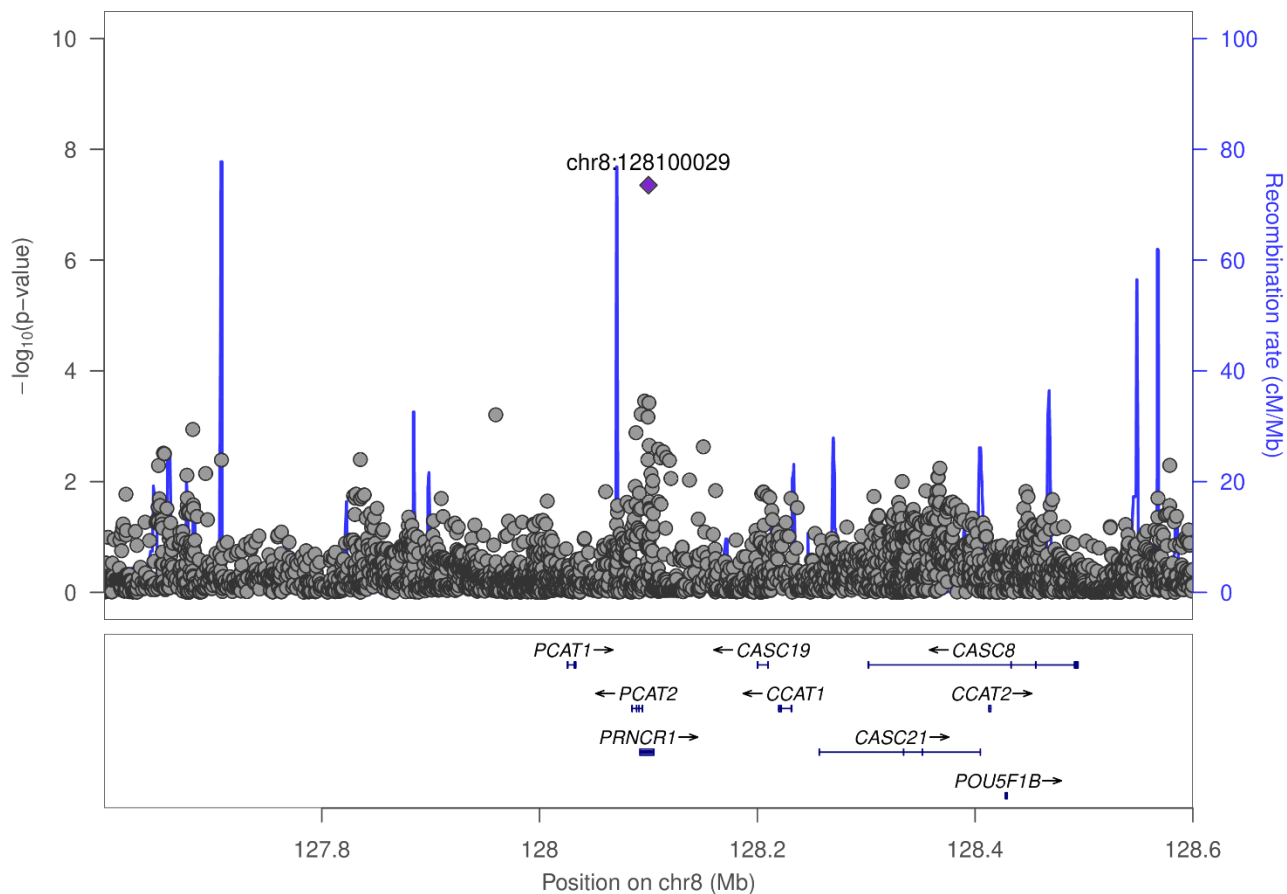

**J: Micro chr11:16937846 (rs183937294)**

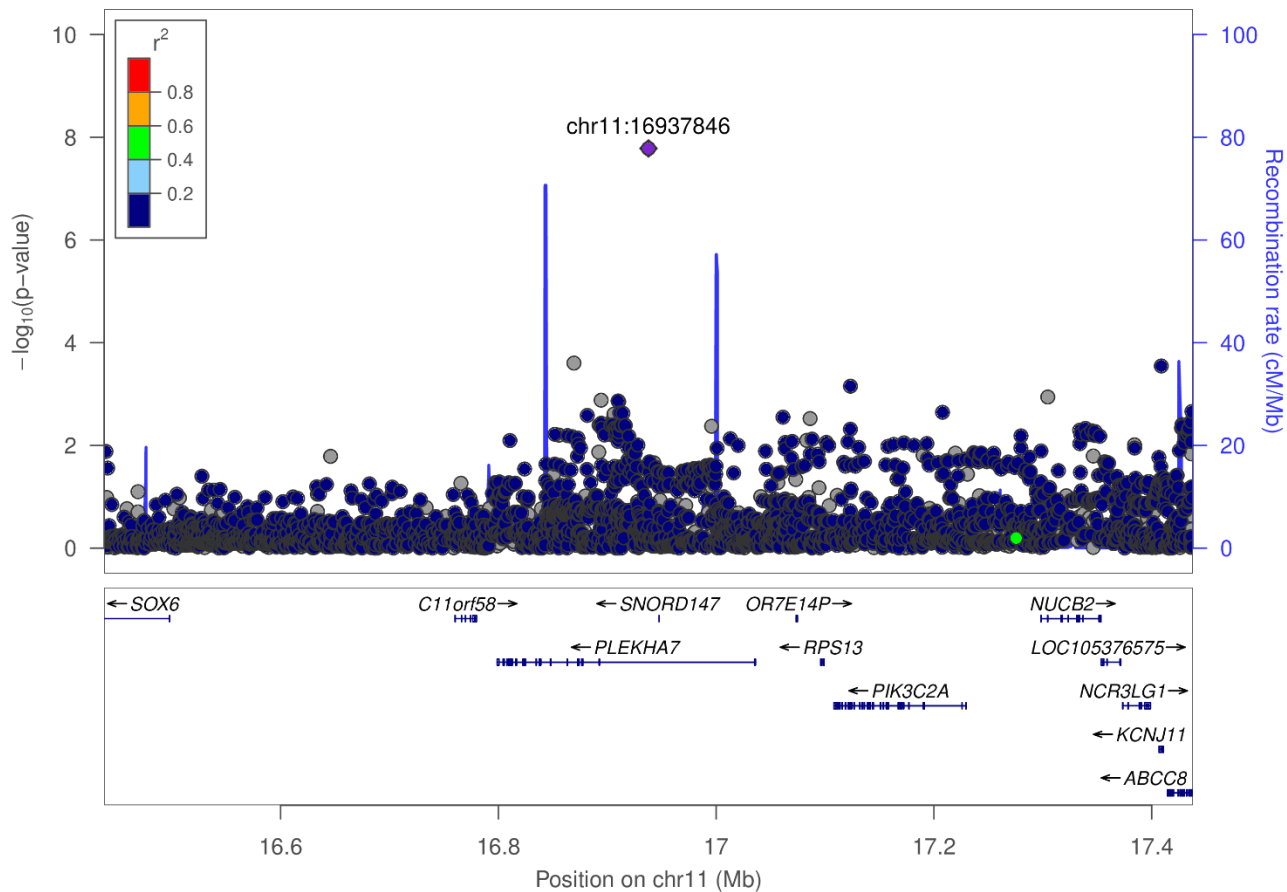

**K: CKD chr18:1811108 (rs185299109)**

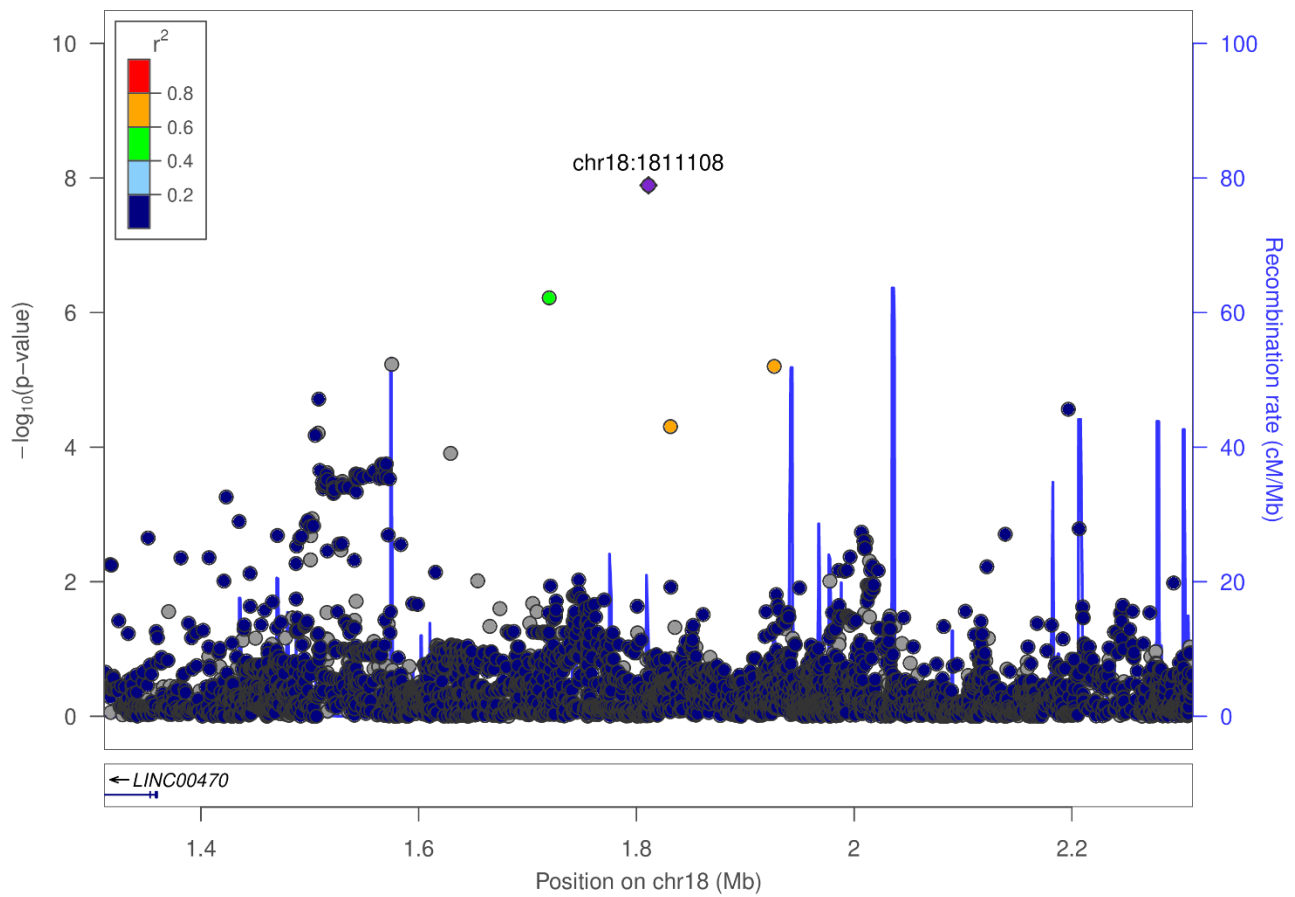

**ESM Figure 5: Gene prioritization for the COL4A3 gene at lead SNP rs5570367 associated with Severe DKD using multiple intersecting gene prioritization approaches (PoPS, nearest gene, and MAGMA).** Plotted is the PoP Score (y-axis) versus the genes within a 500kb flanking window surrounding the lead SNP (x-axis), colored by distance to the lead SNP, and bolded if the gene was also within the top 10% of prioritized genes genome-wide using MAGMA.

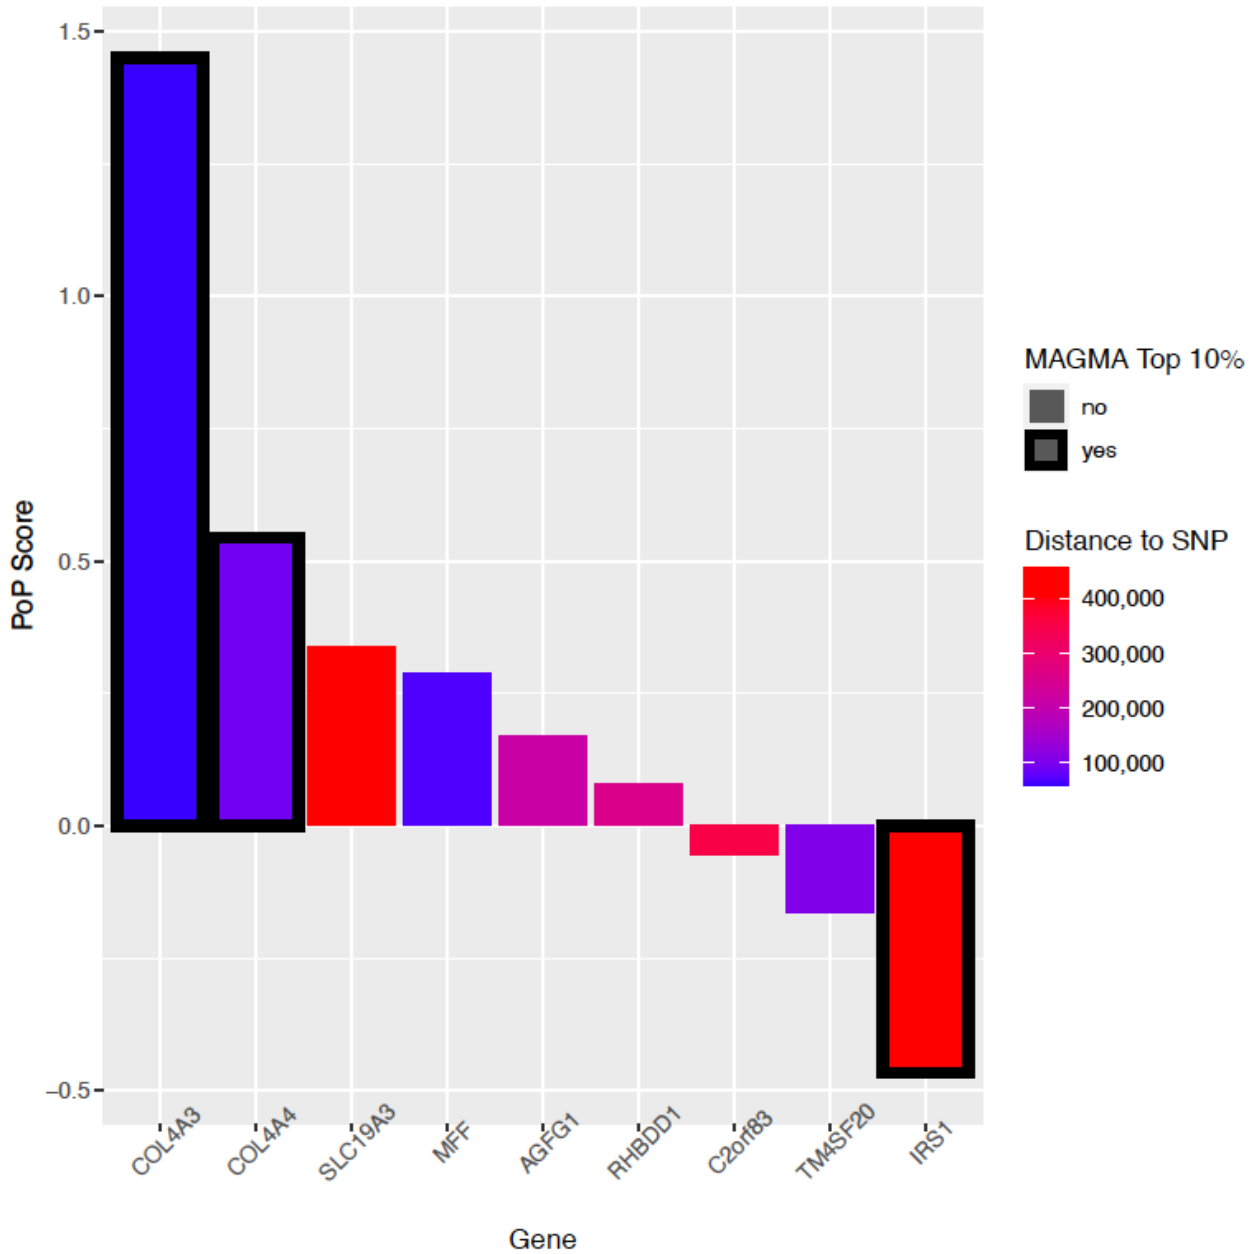

**ESM Figure 6: Regional association plots for the gene-level analysis results from MAGMA and PASCAL analysis.** The implicated gene region is highlighted in blue. If the same gene was significant in both analyses, only MAGMA region is highlighted (gene flanking  $\pm 50$  kbp, vs.  $\pm 5$  kbp for PASCAL).

**A: CKD, *PTPRN***

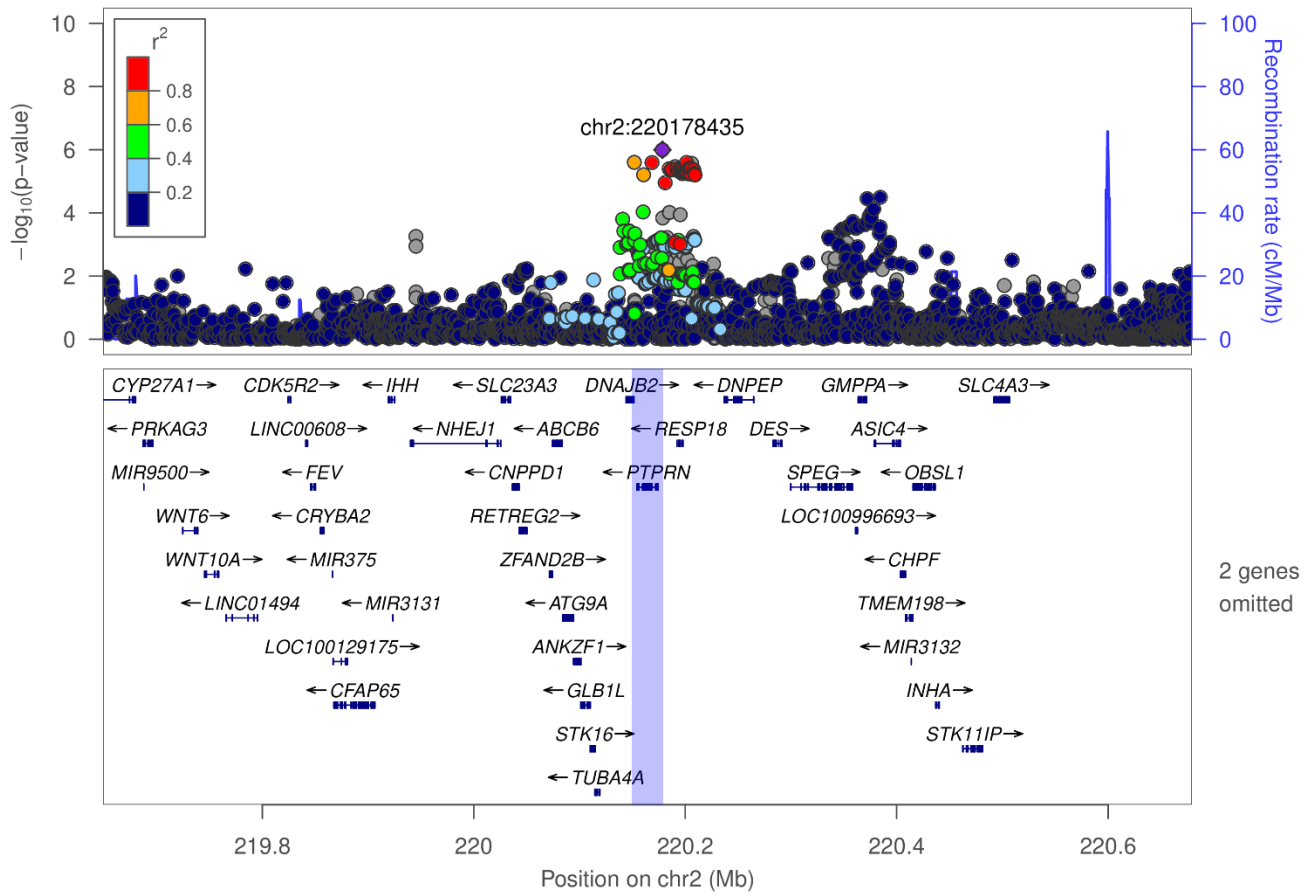

**B: CKD, *RESP18***

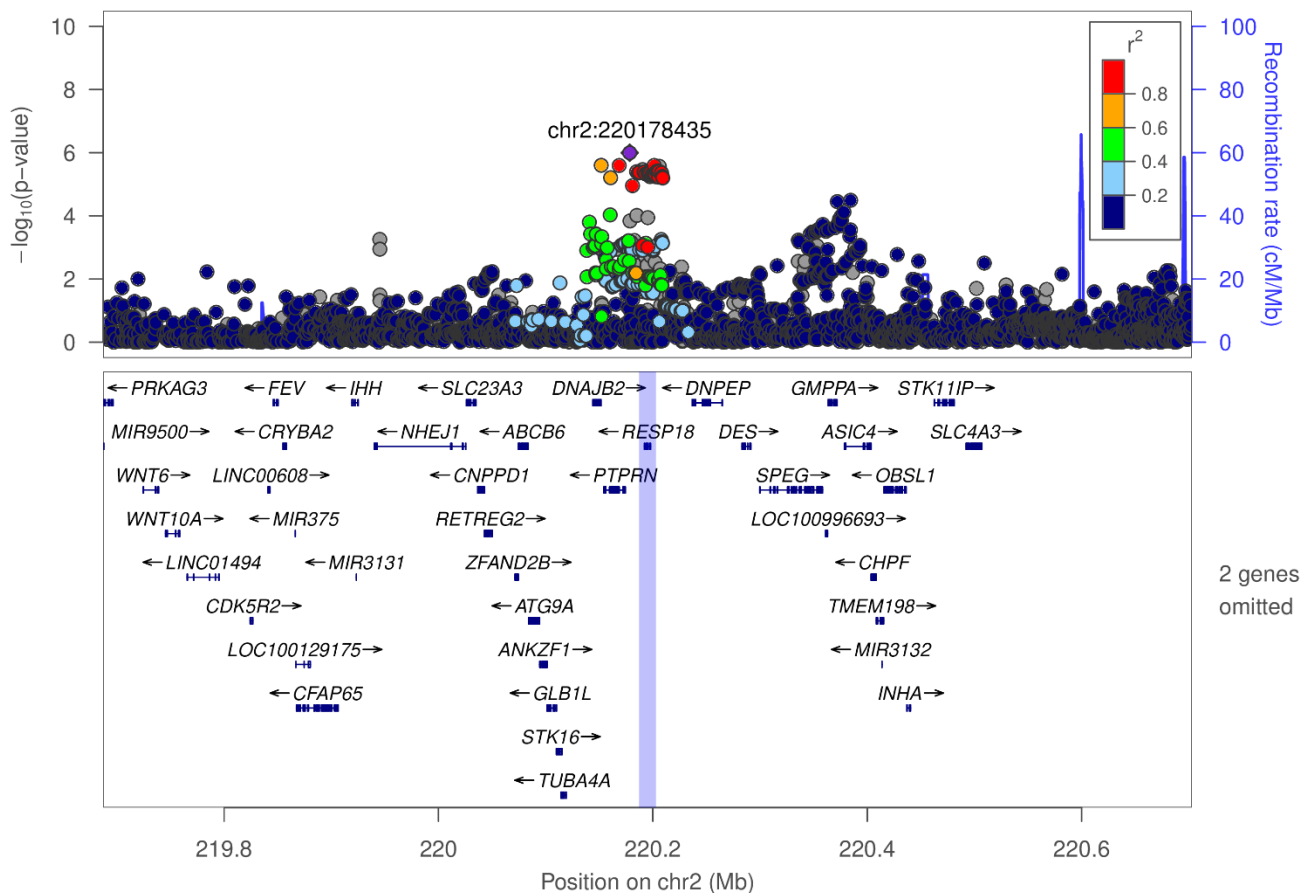

**C: Severe DKD, *MFF***

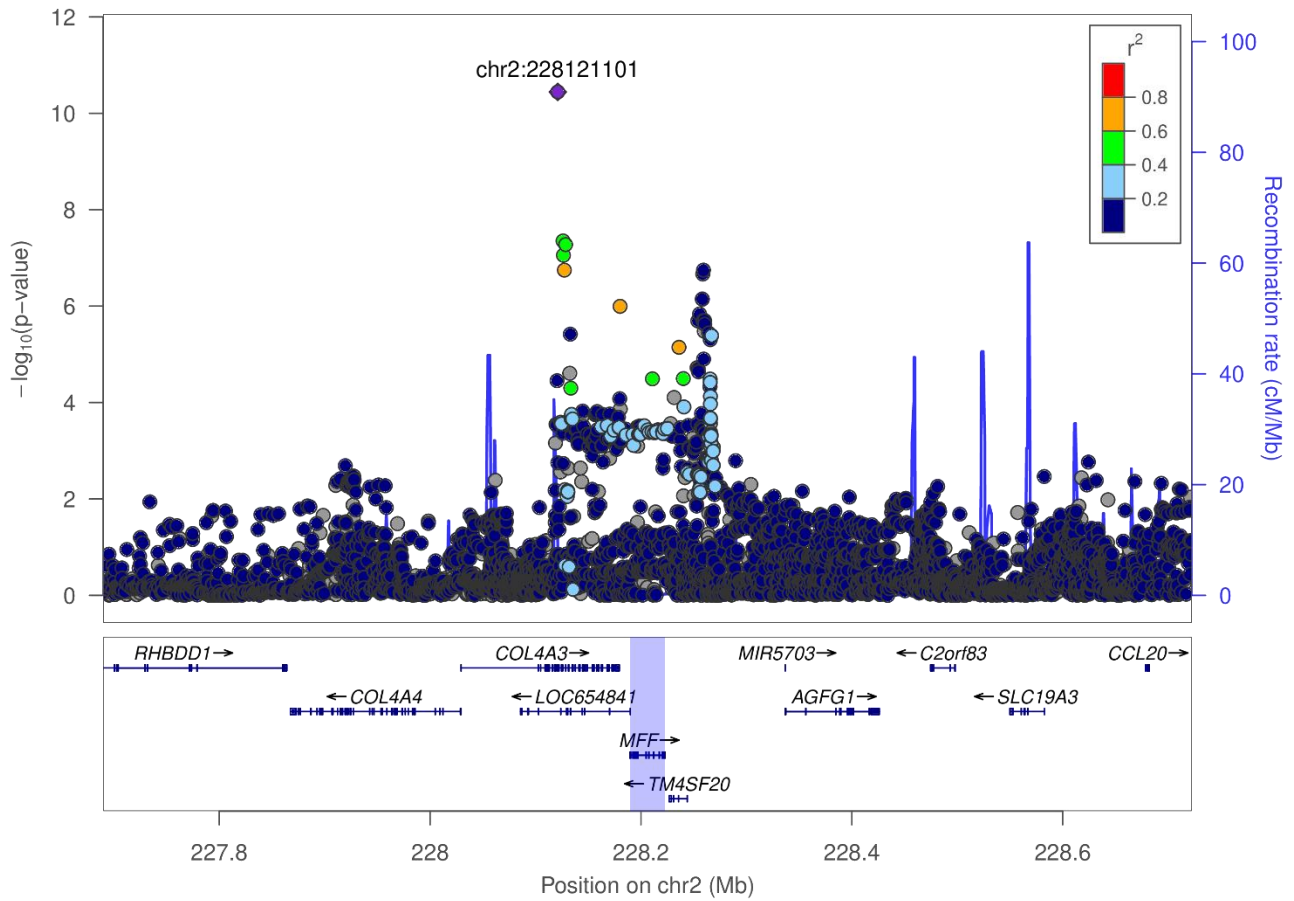

**D: ESRD vs. macro, *EIF4E***

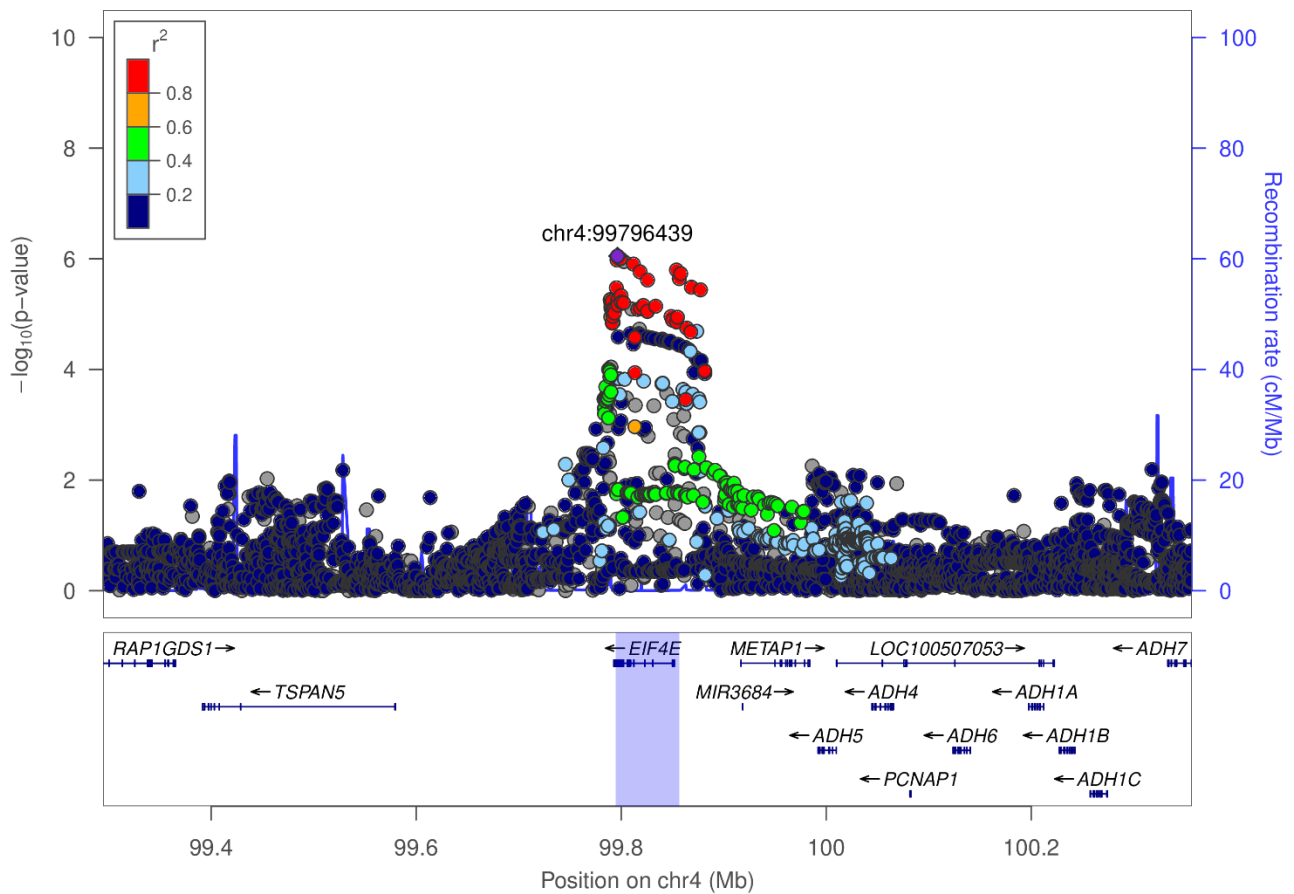



**E: DKD, *INIP***

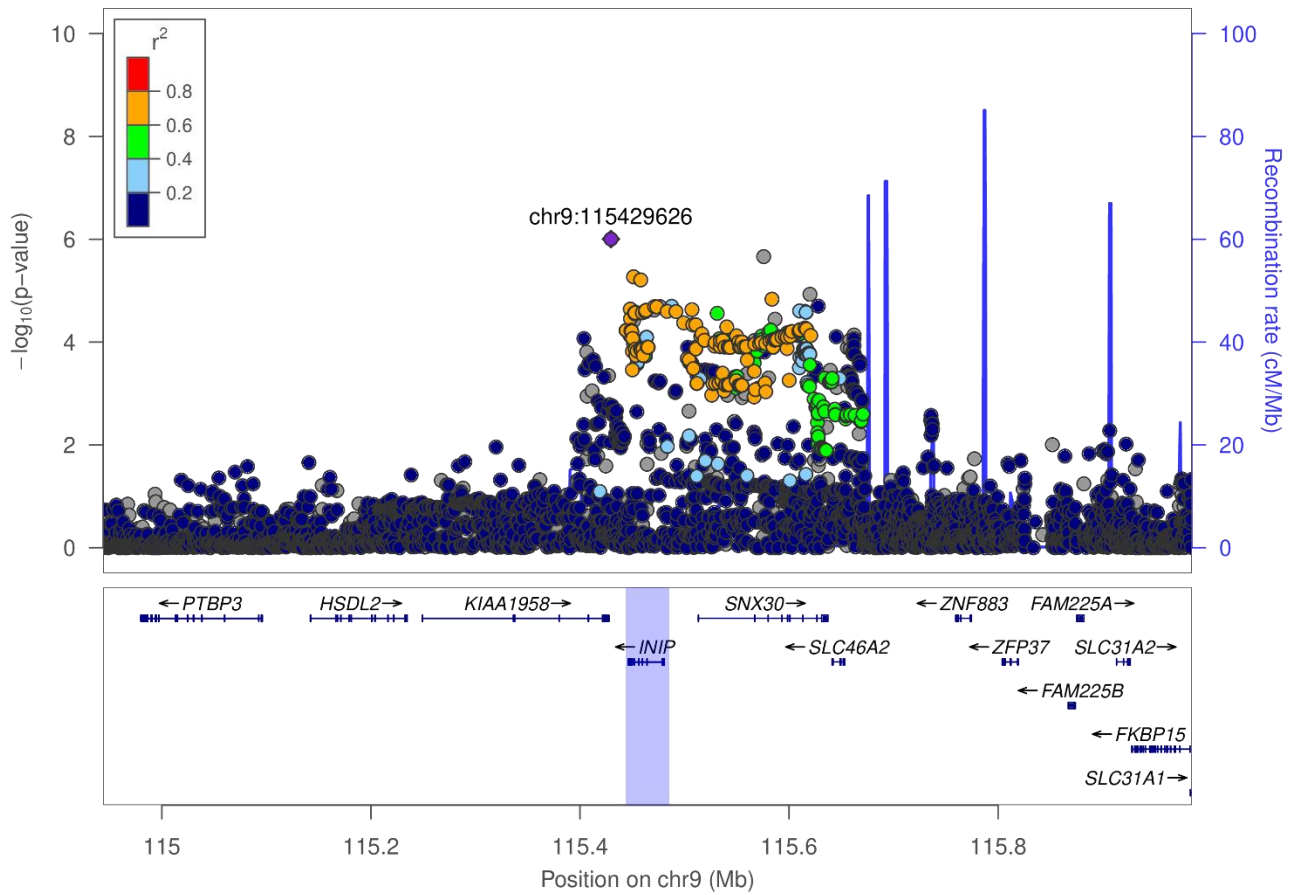

**F: DKD, *SNX30***

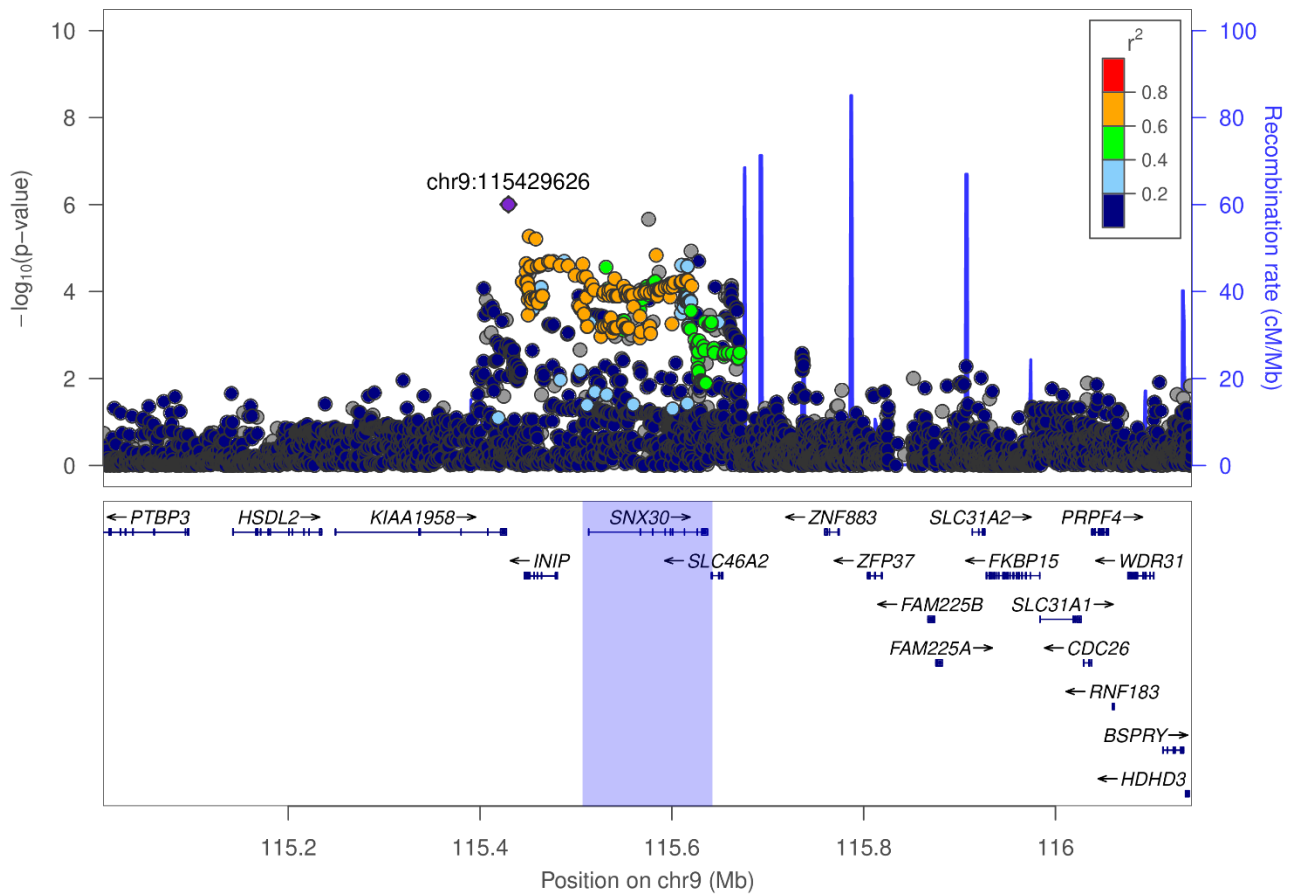

### G: Severe DKD, *GPR158*

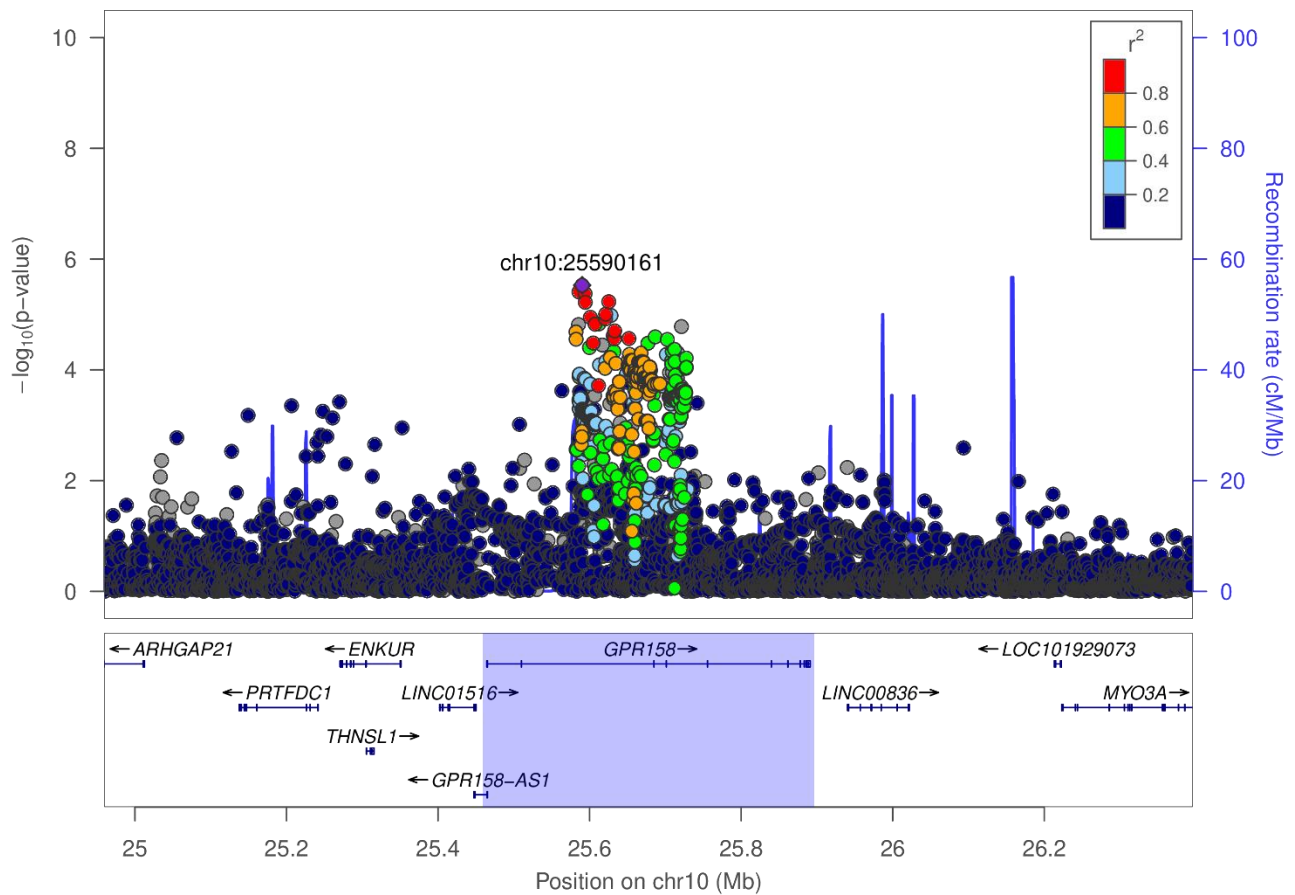

### H: ESRD vs. macro, *DCLK1*

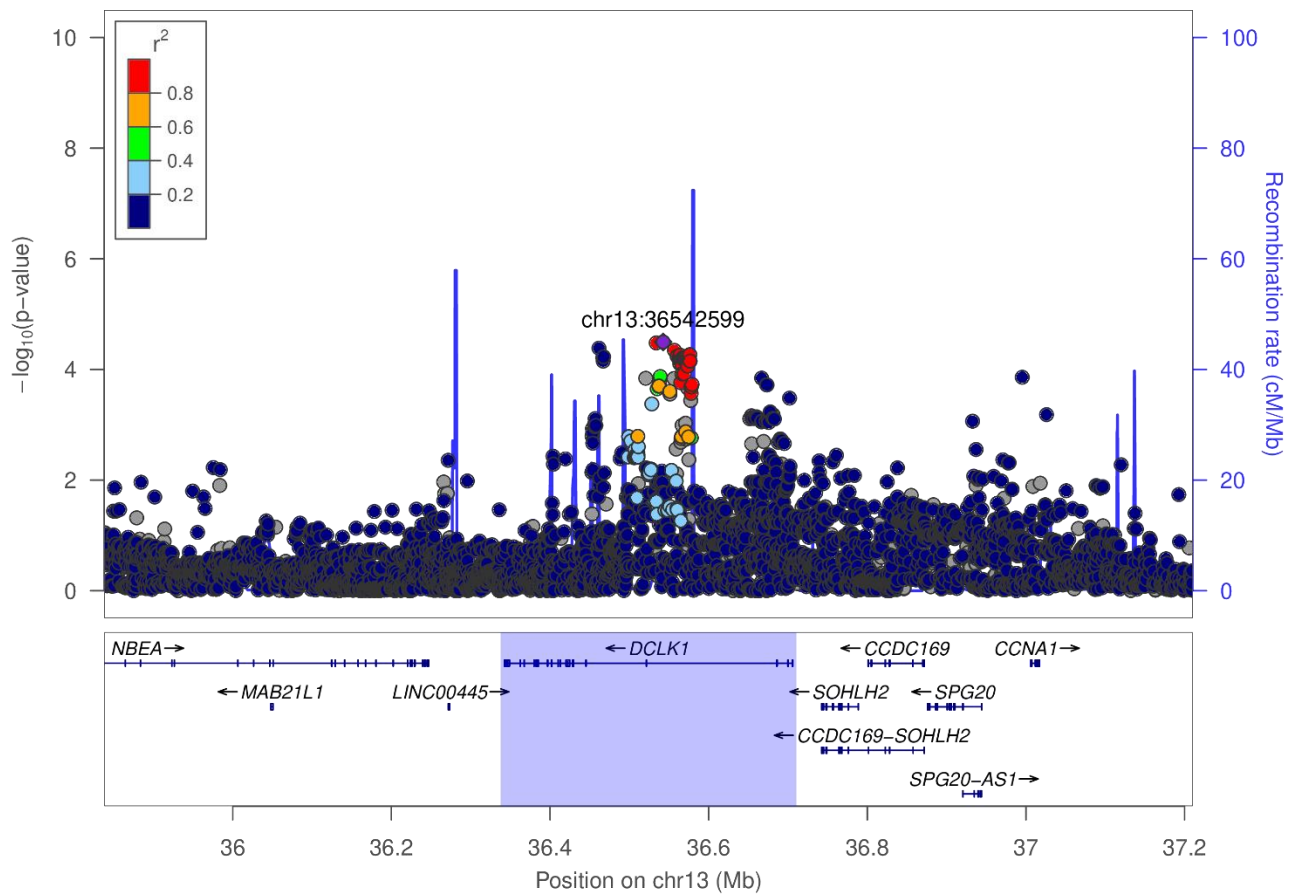

**I: Severe DKD, *LSM14A***

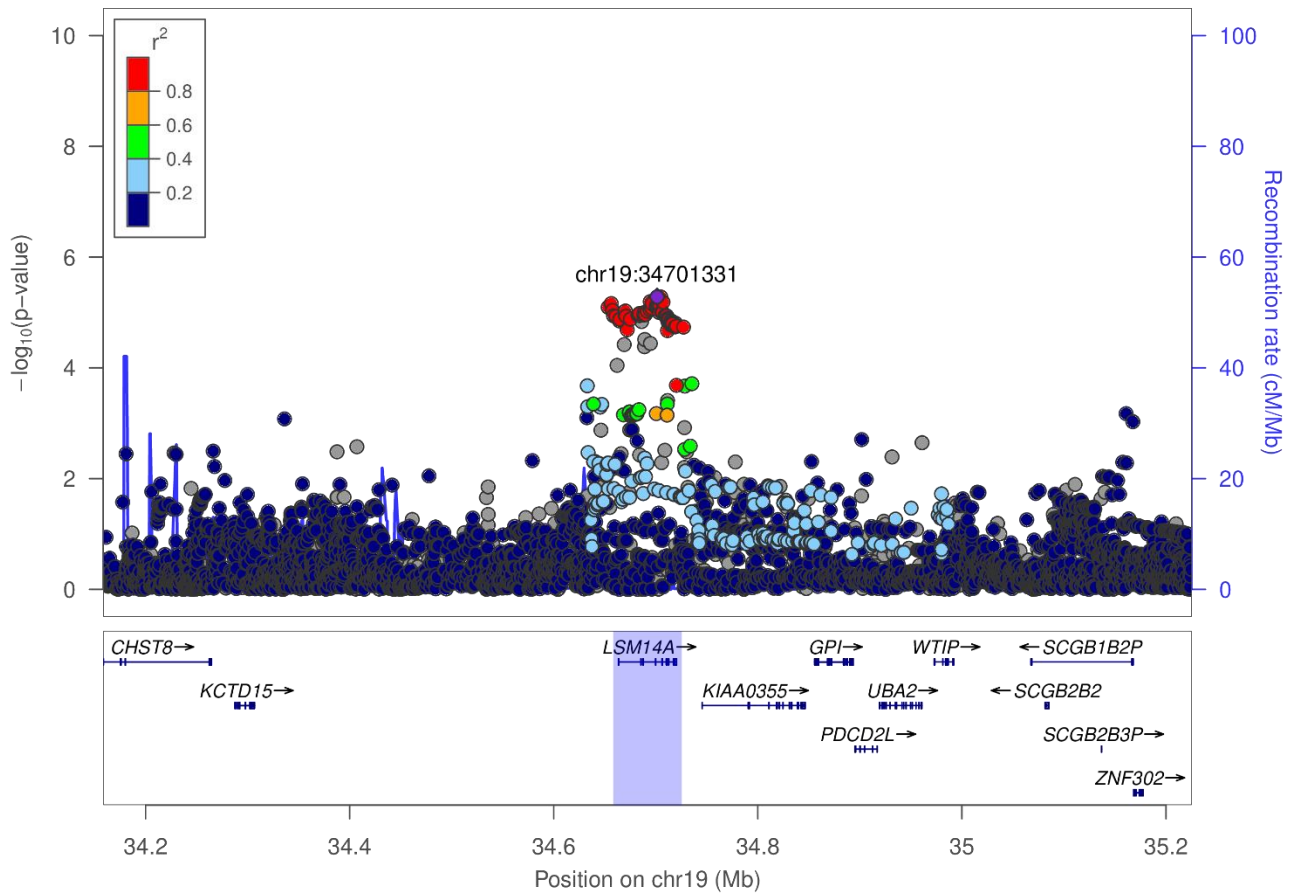

**J: CKD extremes, *COL20A1***

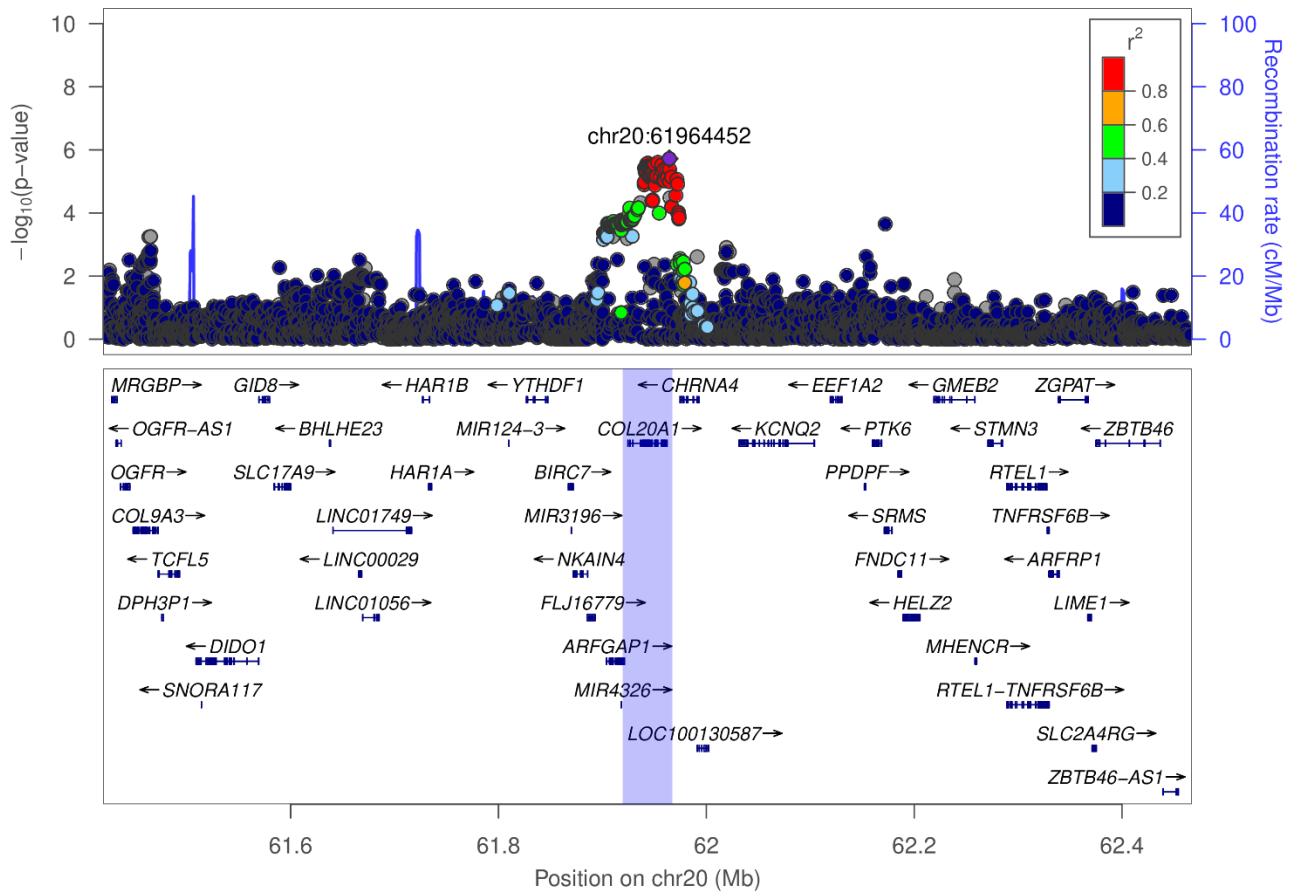

**ESM Figure 7: TWAS QQ-plots and genomic control  $\lambda_{GC}$  inflation factors for A) tubular and B) glomerular expression.**

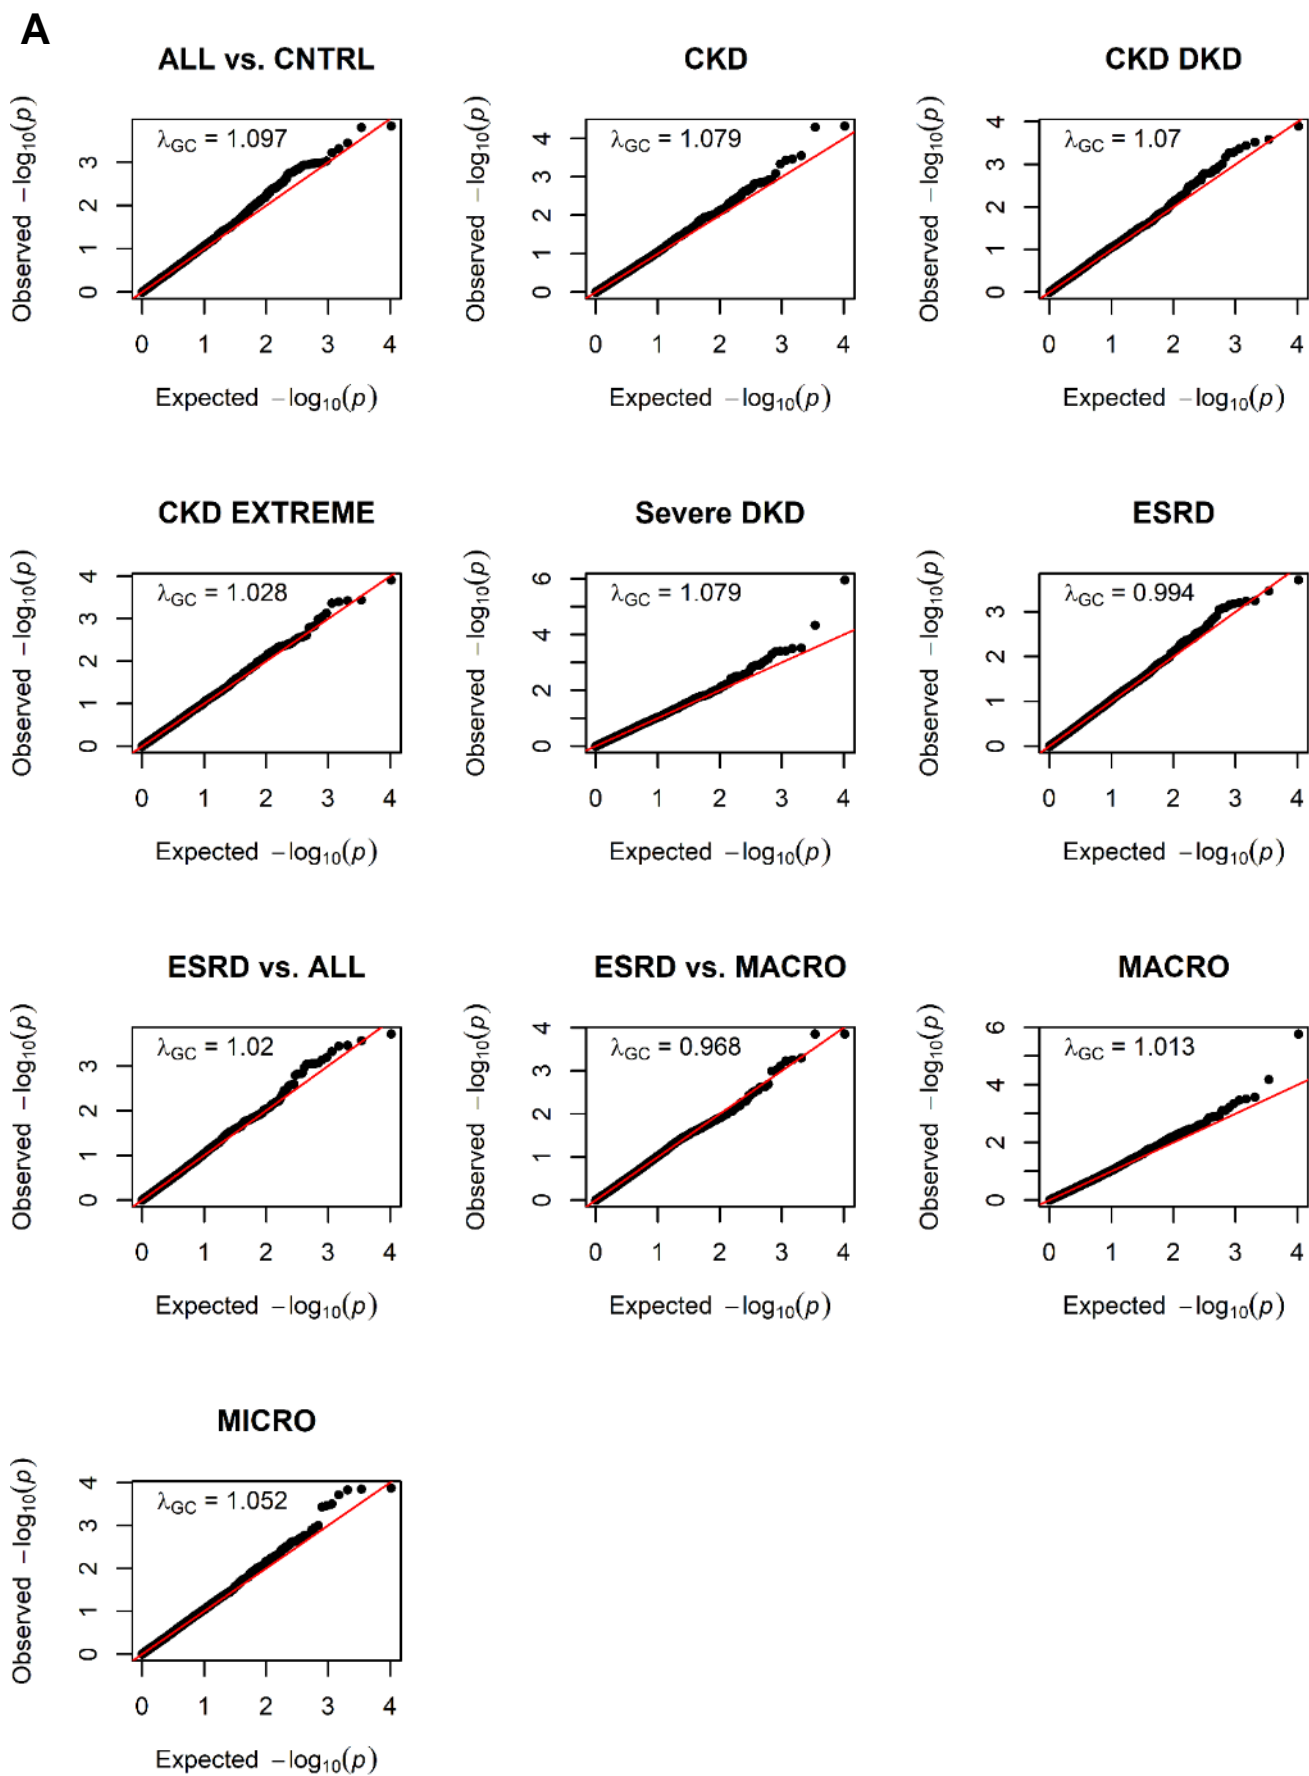

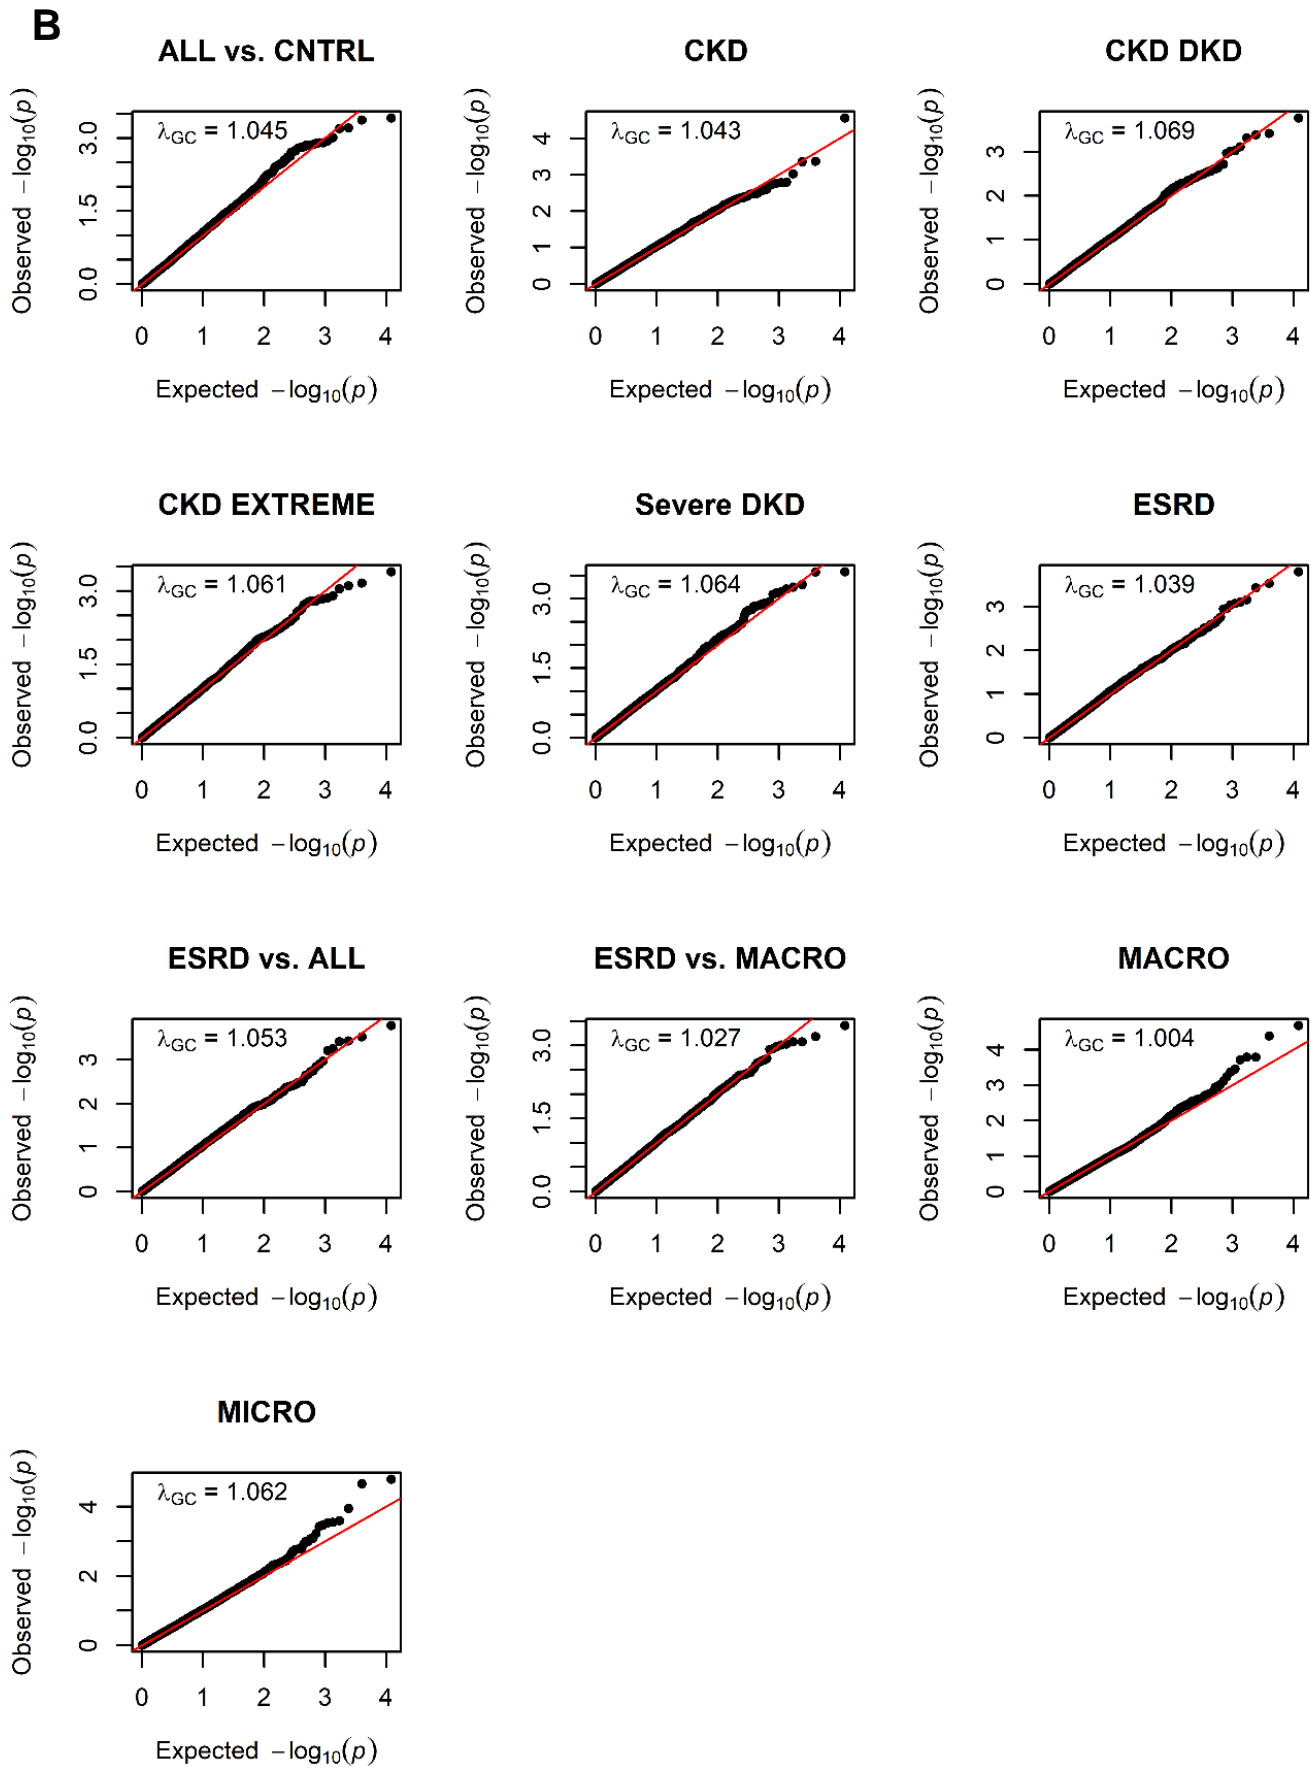

**ESM Figure 8: Tubular and glomerular gene expression of the lead genes correlate with multiple morphological and pathological renal parameters.** Golden rectangles indicate glomerular gene expression, green ellipses tubular gene expression, and gray circles the morphological phenotypes. All nominally significant correlations are shown. Blue edges indicate negative correlation, red edges positive correlation. Correlation with fibrosis, Glomerulosclerosis (GlomScl), and eGFR are measured in the nephrectomy samples. B1\_ and B2\_ indicate phenotypes from the first and second renal biopsies (B1, B2, respectively) from the Pima Indians, correlated with gene expression in transcriptomic data from the corresponding time point. B1/2\_GlomVol: glomerular volume; B1/2\_GlomW: glomerular width; B1/2\_FPW: podocyte foot process width. B1/2\_ACR: albumin creatinin ratio; B1/2\_Fibr: fibrosis; B1/2\_HbA1c: HbA1c B1/2\_MesVol: mesangial volume; B1/2\_SV: Surface volume of peripheral glomerular basement membrane per glomerulus; B1\_Slope: measured GFR (mGFR) slope between the B1 and B2. B1\_DMesVol: change in mesangial volume between B1 and B2. B1\_DSV: change in SV between B1 and B2.

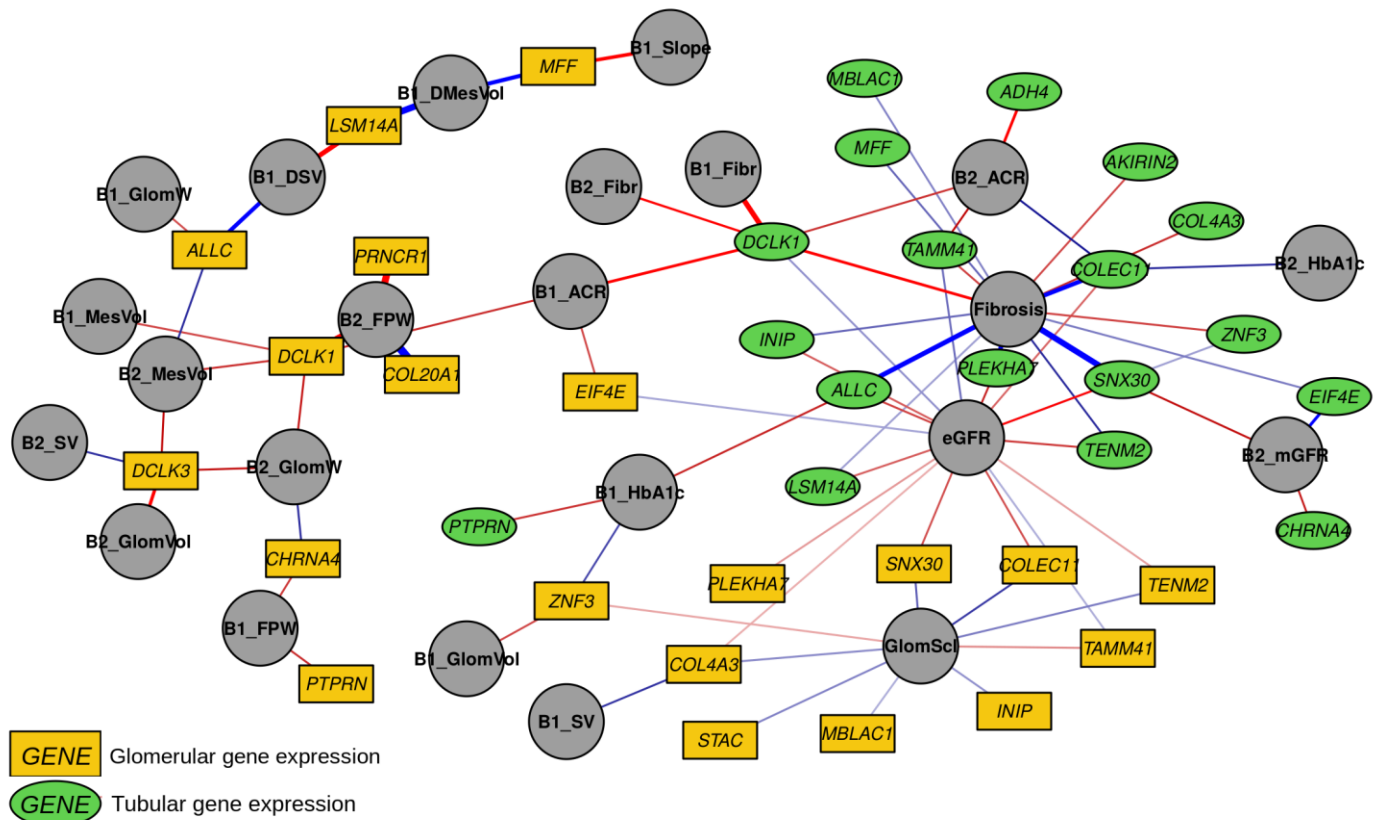

**ESM Figure 9: Genetic correlation between DKD and related traits based on LD score regression.** Only trait combinations with  $p < 0.05$  are shown, and traits that remained significant after correcting for 78 studied traits ( $p\text{-value} < 0.05/78 = 6.4 \times 10^{-4}$ ) are indicated with dark dot borders. Dot colors indicate aging related (light purple), anthropometric (green; including BMI and obesity related (light green), height (dark green), and waist and/or hip related (pale green)), inflammatory bowel disease (orange), bone mineral density (light gray), coronary artery disease (red), glyceimic (light blue), type 2 diabetes (dark blue), serum creatinine and cystatin C (brown), lipids (yellow), uric acid (purple), and smoking related (dark gray) traits.

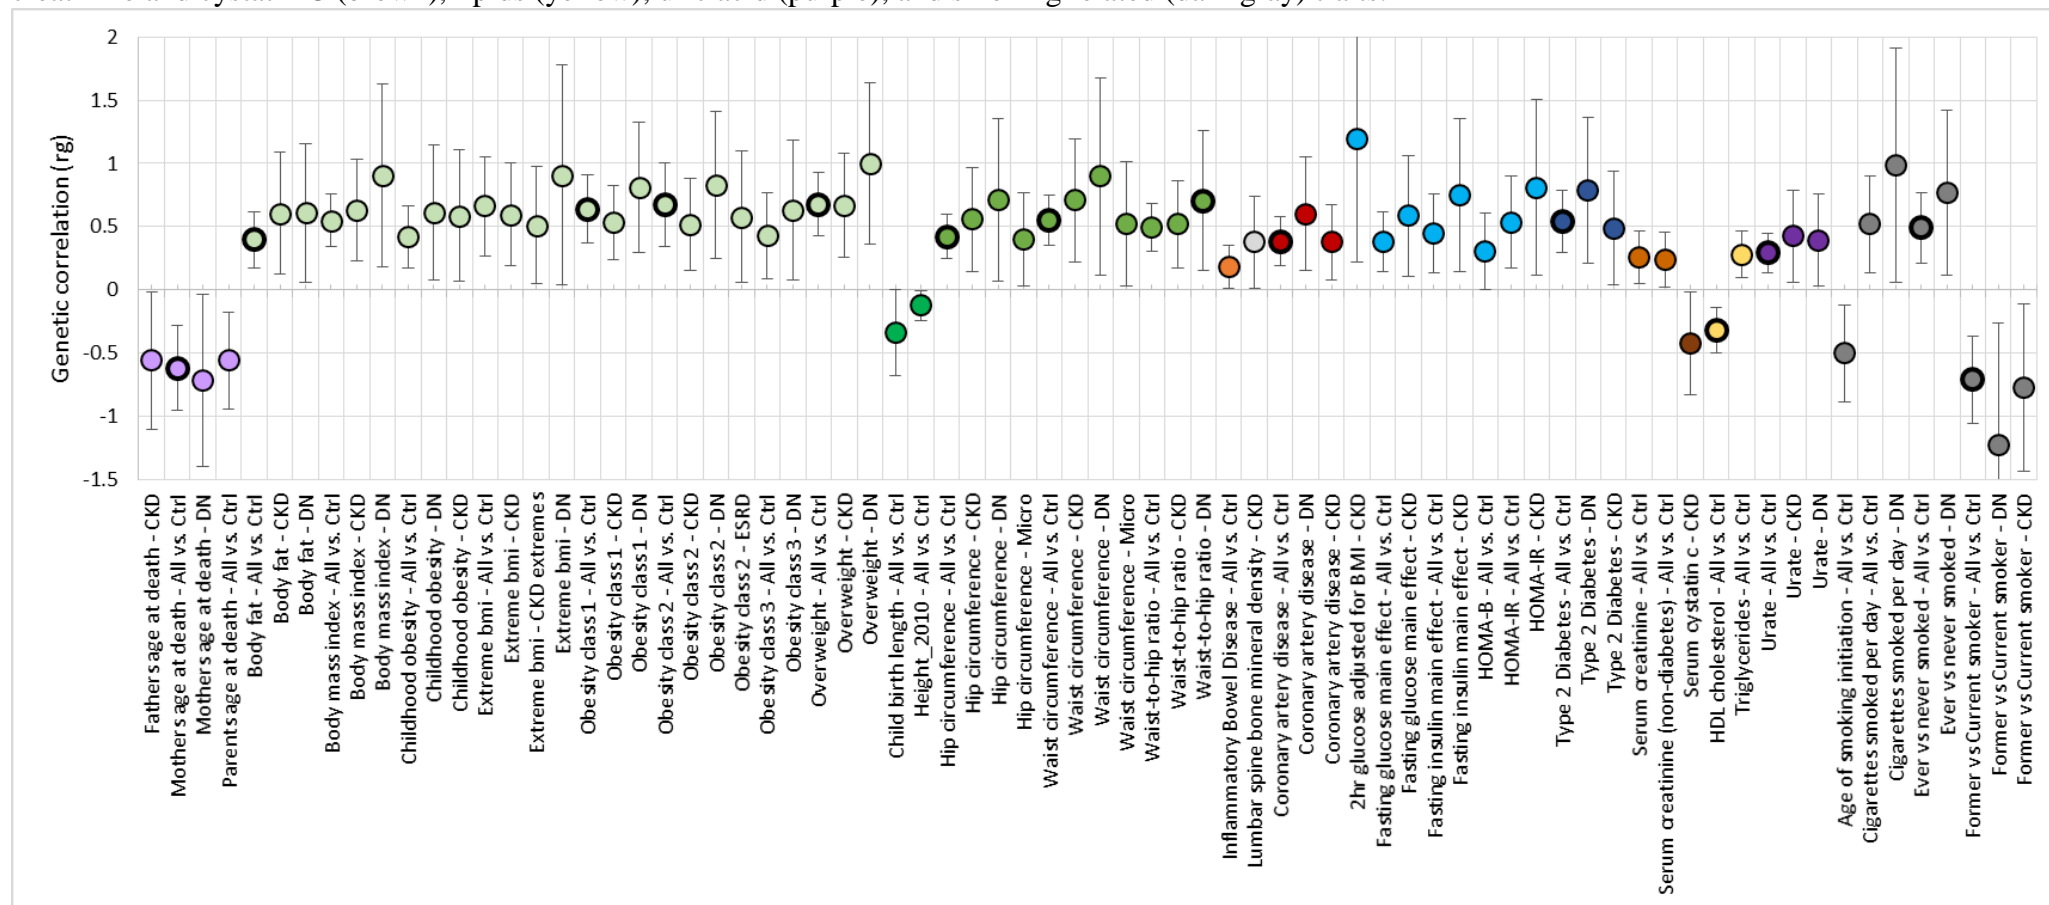

**ESM Figure 10: Mendelian Randomization scatter plots for SNP effects for the metabolic traits vs. DKD (All vs. Ctrl).** Lines indicate IVW, Weighted median, and MR Egger coefficients.

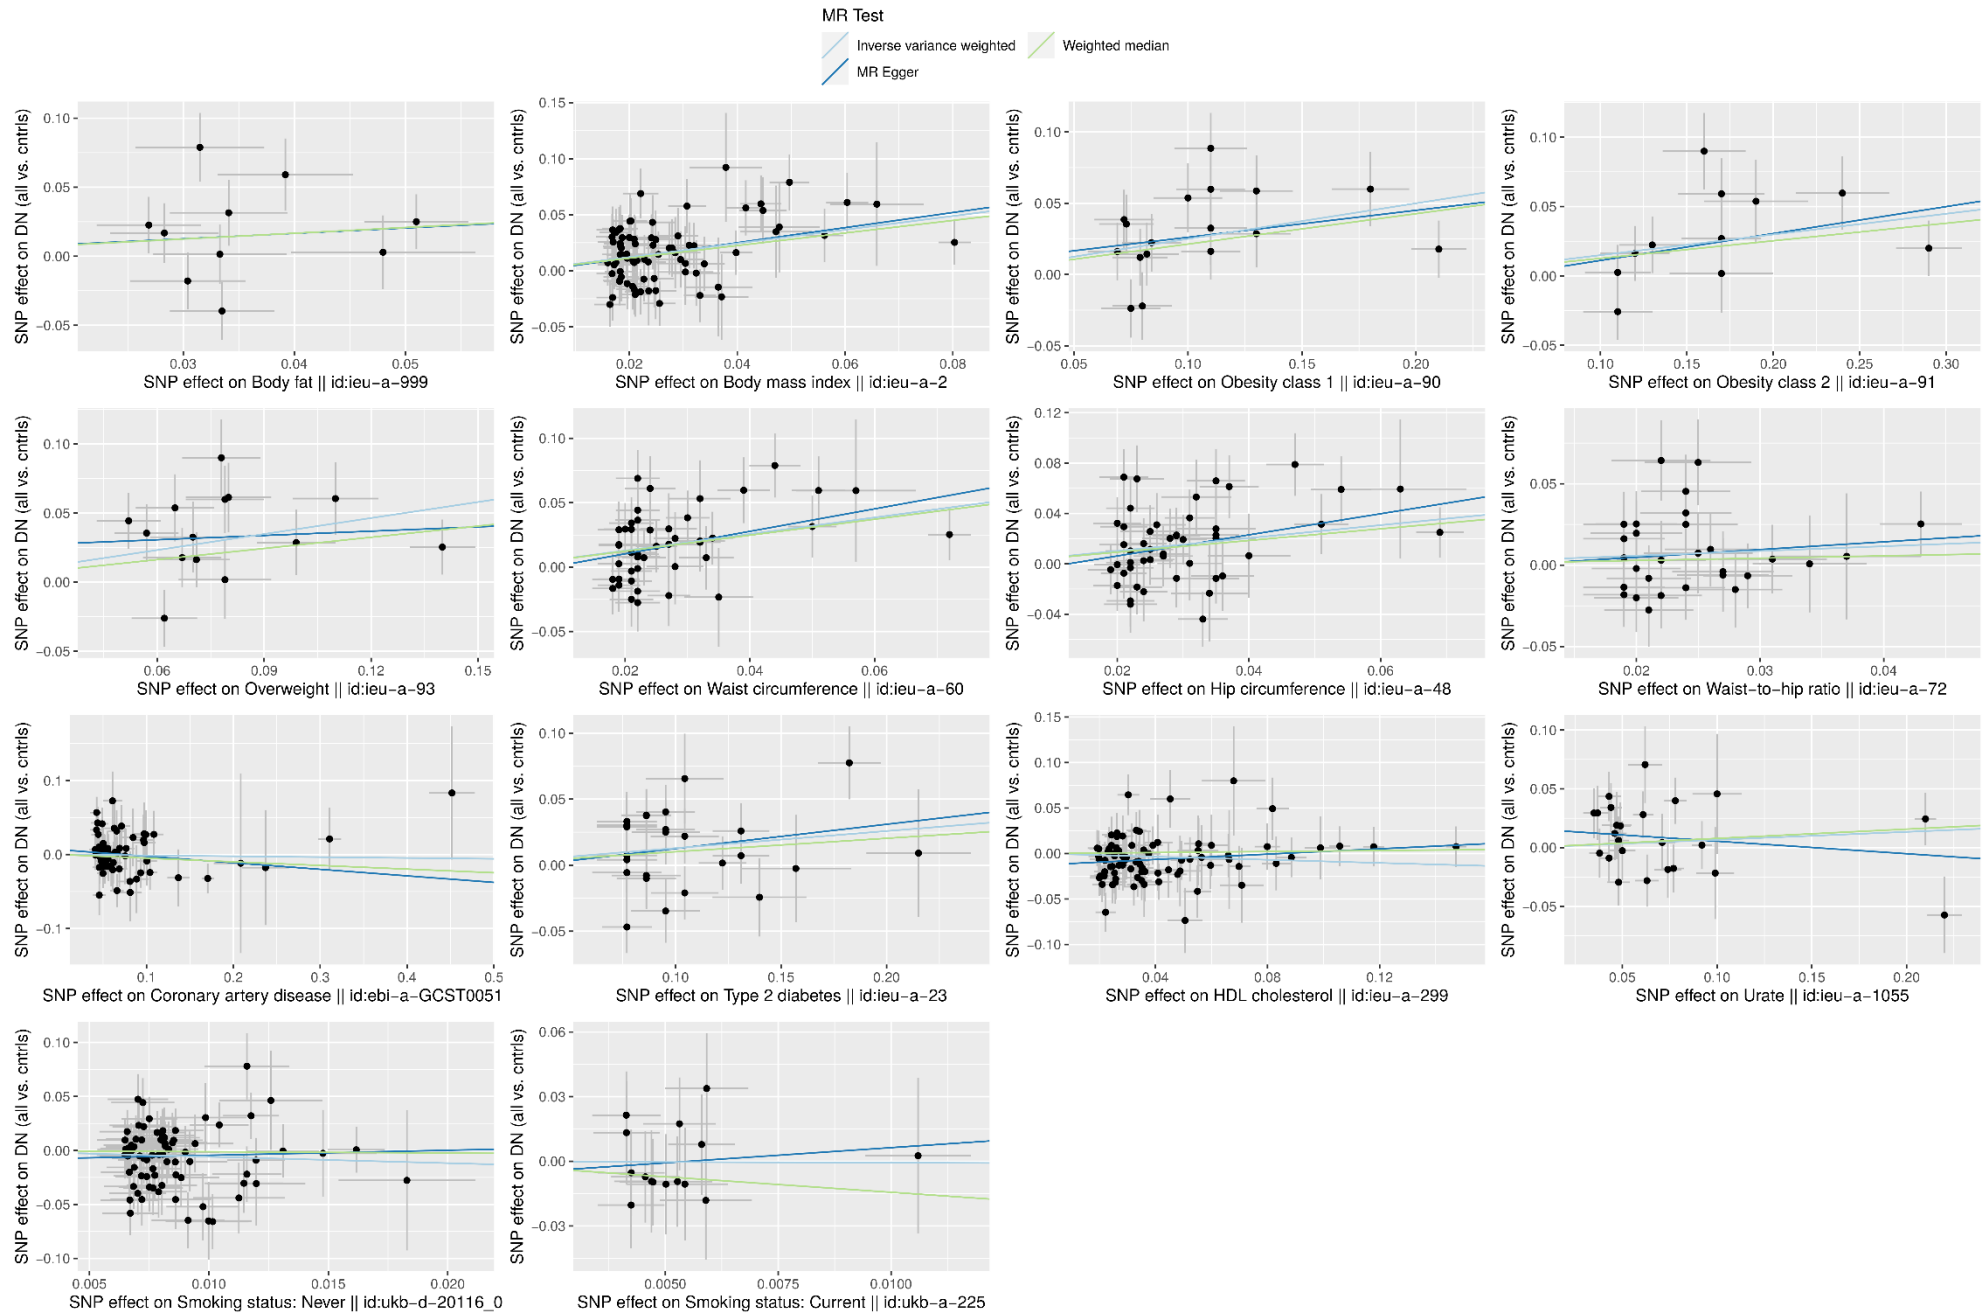



**ESM Figure 11: rs1260634 intronic in the LSM14A gene affects the predicted binding motifs for KLF12, KLF4, and SP8 (top to bottom).** Images obtained from the RegulomeDB ([www.regulomedb.org](http://www.regulomedb.org))

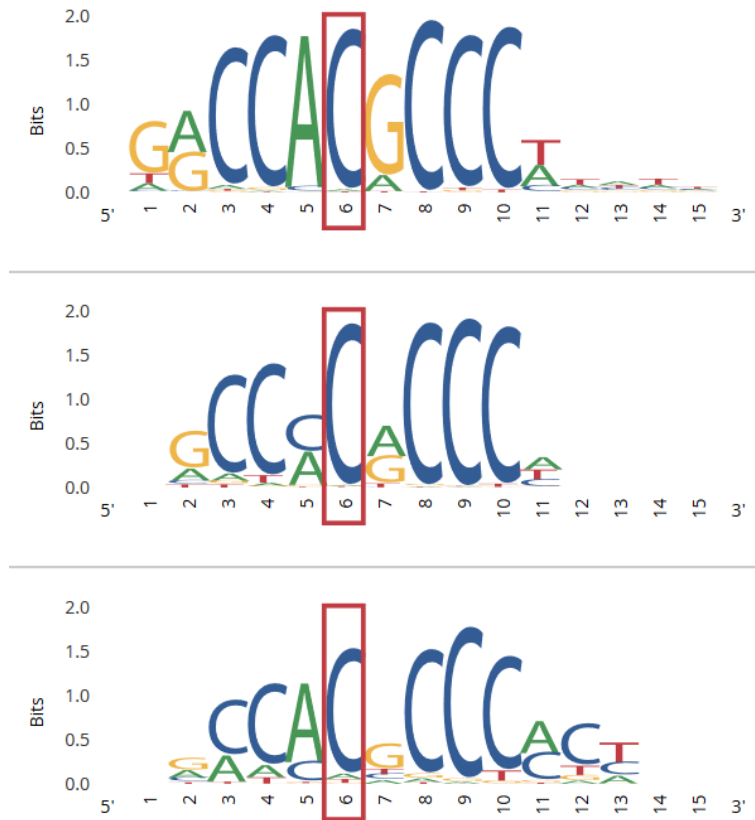

Supplement: 125_2022_5735_MOESM1_ESM.pdf [file 125_2022_5735_MOESM1_ESM.pdf]
